# Supplementary material for: N-Heterocyclic imino-catalyzed 1,4-regioselective azide–alkyne cycloaddition (AAC): a metal-free approach
Source: Royal Society of Chemistry journal article supplement (doi:10.1039/d3cc04065h), 2023-01-01
Supplement: d3cc04065h2.pdf [file d3cc04065h2.pdf]

## Supporting Information

### **N-Heterocyclic Imino Catalyzed 1,4-Regioselective Azide-Alkyne Cycloaddition (AAC): A Metal-free Approach**

Shanmugam Revathi,<sup>a</sup> Aditya L. Shinde,<sup>a</sup> Mulimani K. Rajashekhar,<sup>a</sup> Debasish Mandal,<sup>b</sup>  
Amit Ranjan Maity,<sup>c</sup> Somenath Garai,<sup>d</sup> and Tapas Ghatak,<sup>\*a</sup>

## Table of Contents

|                                                                                                                                                |     |
|------------------------------------------------------------------------------------------------------------------------------------------------|-----|
| <b>1. General Experimental Details</b>                                                                                                         | S3  |
| <b>2. Instrumentation Methods</b>                                                                                                              | S3  |
| <b>3. Experimental Section</b>                                                                                                                 | S4  |
| <b>4. Spectral data of the compounds</b>                                                                                                       | S9  |
| <b>Figure S1:</b> IR spectrum of <b>C-A</b>                                                                                                    | S10 |
| <b>Figure S2:</b> IR spectrum of <b>C-B</b>                                                                                                    | S11 |
| <b>Figure S3:</b> IR spectrum of <b>C-D</b>                                                                                                    | S12 |
| <b>Figure S4:</b> <sup>1</sup> H and <sup>13</sup> C NMR spectra of 1,3-dihydro-2H-benzo[d]imidazol-2-imine ( <b>C-A</b> )                     | S13 |
| <b>Figure S5:</b> <sup>1</sup> H and <sup>13</sup> C NMR spectra of 1H-perimidin-2(3H)-imine ( <b>C-B</b> )                                    | S14 |
| <b>Figure S6:</b> <sup>1</sup> H and <sup>13</sup> C NMR spectra of N,N- <sup>i</sup> Pr-Perimidin-2-imine)-N'-p-tolylisoureate ( <b>C-D</b> ) | S15 |
| <b>Figure S7:</b> Molecular structure of compound <b>C-D</b>                                                                                   | S16 |
| <b>Table ST1:</b> Crystal data and structure refinement parameters for <b>C-D</b>                                                              | S17 |
| <b>Table ST2:</b> Selected bond length (Å) for <b>C-D</b>                                                                                      | S18 |
| <b>Table ST3:</b> Selected bond angles (°) for <b>C-D</b>                                                                                      | S19 |
| <b>Scheme S1:</b> Synthesis of various NHI precatalysts <b>C-A</b> , <b>C-B</b> , and <b>C-D</b>                                               | S20 |
| <b>Scheme S2:</b> Formation N-heterocyclic imino ( <b>C-A'-C-D'</b> ) from NHI ( <b>C-A-C-D</b> )                                              | S20 |
| <b>Table ST4:</b> Optimization of the reaction conditions                                                                                      | S20 |
| <b>Figure S8:</b> <sup>1</sup> H and <sup>13</sup> C NMR spectra of 1-benzyl-4-phenyl-triazole ( <b>1a</b> )                                   | S21 |
| <b>Figure S9:</b> <sup>1</sup> H and <sup>13</sup> C NMR spectra of 1-benzyl-4-(4-fluorophenyl)-triazole ( <b>1b</b> )                         | S22 |
| <b>Figure S10:</b> <sup>1</sup> H and <sup>13</sup> C NMR spectra of 1-benzyl-4-(p-tolyl)-triazole ( <b>1c</b> )                               | S23 |
| <b>Figure S11:</b> <sup>1</sup> H and <sup>13</sup> C NMR spectra of 1-benzyl-4-(4-methoxyphenyl)-triazole ( <b>1d</b> )                       | S24 |
| <b>Figure S12:</b> <sup>1</sup> H and <sup>13</sup> C NMR spectra of 2-(1-benzyl-triazol-4-yl) pyridine ( <b>1e</b> )                          | S25 |
| <b>Figure S13:</b> <sup>1</sup> H and <sup>13</sup> C NMR spectra of 1-benzyl-4-butyl-triazole ( <b>1f</b> )                                   | S26 |
| <b>Figure S14:</b> <sup>1</sup> H and <sup>13</sup> C NMR spectra of 1-benzyl-4-tert-butyl-triazole ( <b>1g</b> )                              | S27 |
| <b>Figure S15:</b> <sup>1</sup> H and <sup>13</sup> C NMR spectra of 1-benzyl-4-(cyclohexyl)-triazole ( <b>1h</b> )                            | S28 |
| <b>Figure S16:</b> <sup>1</sup> H and <sup>13</sup> C NMR spectra of 2-(1-benzyl-triazol)ethan-1-ol ( <b>1i</b> )                              | S29 |
| <b>Figure S17:</b> <sup>1</sup> H and <sup>13</sup> C NMR spectra of 2-(1-benzyl-triazol-4-yl) propan-2-ol ( <b>1j</b> )                       | S30 |
| <b>Figure S18:</b> <sup>1</sup> H and <sup>13</sup> C NMR spectra of 1,4-diphenyl-triazole ( <b>2a</b> )                                       | S31 |
| <b>Figure S19:</b> <sup>1</sup> H and <sup>13</sup> C NMR spectra of 1-naphthyl-4-phenyl-triazole ( <b>3a</b> )                                | S32 |
| <b>Figure S20:</b> <sup>1</sup> H and <sup>13</sup> C NMR spectra of 1-(4-methoxyphenyl)-4-phenyl-triazole ( <b>4a</b> )                       | S33 |
| <b>Figure S21:</b> <sup>1</sup> H and <sup>13</sup> C NMR spectra of 1-(4-tolyl)-4-phenyl-triazole ( <b>5a</b> )                               | S34 |
| <b>Figure S22:</b> <sup>1</sup> H and <sup>13</sup> C NMR spectra of 1-(3-tolyl)-4-phenyl-triazole ( <b>6a</b> )                               | S35 |
| <b>Figure S23:</b> <sup>1</sup> H and <sup>13</sup> C NMR spectra of 1-(2-tolyl)-4-phenyl-triazole ( <b>7a</b> )                               | S36 |
| <b>Figure S24:</b> <sup>1</sup> H and <sup>13</sup> C NMR spectra of 1-(2,4,6-mesityl)-4-phenyl-triazole ( <b>8a</b> )                         | S37 |
| <b>Figure S25:</b> <sup>1</sup> H and <sup>13</sup> C NMR spectra of 1-(4-fluorophenyl)-4-phenyl-triazole ( <b>9a</b> )                        | S38 |
| <b>Figure S26:</b> <sup>1</sup> H and <sup>13</sup> C NMR spectra of 1-(4-chlorophenyl)-4-phenyl-triazole ( <b>10a</b> )                       | S39 |
| <b>Figure S27:</b> <sup>1</sup> H and <sup>13</sup> C NMR spectra of 1-(4-bromophenyl)-4-phenyl-triazole ( <b>11a</b> )                        | S40 |
| <b>Figure S28:</b> <sup>1</sup> H and <sup>13</sup> C NMR spectra of 1-(4-nitrophenyl)-4-phenyl-triazole ( <b>12a</b> )                        | S41 |
| <b>Figure S29:</b> <sup>1</sup> H and <sup>13</sup> C NMR spectra of 1-(3-nitrophenyl)-4-phenyl-triazole ( <b>13a</b> )                        | S42 |
| <b>Figure S30:</b> <sup>1</sup> H and <sup>13</sup> C NMR spectra of 1-(2-nitrophenyl)-4-phenyl-triazole ( <b>14a</b> )                        | S43 |
| <b>Figure S31:</b> The potential energy profile and geometries of the transition states with important geometrical parameters                  | S44 |
| <b>5. Computational Details</b>                                                                                                                | S45 |
| <b>6. References</b>                                                                                                                           | S64 |

## 1. General Experimental Details

The chemicals *o*-Phenylene diamine, 1,8-diamino naphthalene, LiAlH<sub>4</sub>, cyanogen bromide, *p*-tolyl isocyanate, KOH, alkynes, amines, acetone, chloroform (CDCl<sub>3</sub>), and other solvents pentane, hexane, PET ether, ethyl acetate were purchased from Sigma-Aldrich and Avra and used as received. Diethyl ether and toluene were distilled over sodium-benzophenone. Flash column chromatography was performed on silica gel (200–300 mesh) and thin-layer chromatography (TLC) analyses were performed on commercial silica gel plates (60 F254).

## 2. Instrumentation Methods

### 2.1 Infrared spectroscopy

FT-IR spectra were obtained using a SHIMADZU IR Affinity-1 instrument equipped with a high-sensitivity DLaTGS detector and the spectra were recorded in KBr discs. The scans were taken between 400 and 4000 cm<sup>-1</sup> range.

### 2.2. Single crystal data collection and structure determination

The Photon II area detector 3-circle diffractometer was used to glue a suitable crystal to a nylon loop. The Bruker APEX4 Software was used to collect intensity data sets using Mo K $\alpha$  radiation ( $\lambda = 0.71073$ ). The crystal structure was solved in the monoclinic symmetry, space group P21/n using APEX4 software. The structures were solved with SHELXT<sup>1</sup> and refined with the full-matrix least-squares procedure on F<sup>2</sup> by SHELXL.<sup>2</sup> All non-hydrogen atoms were refined anisotropically. The figures were drawn using the DIAMOND software.

### 2.3. NMR spectroscopy

<sup>1</sup>H and <sup>13</sup>C NMR spectra were recorded on a BRUKER (400 MHz) spectrometer. The chemical shifts are reported in parts per million (ppm). Tetramethylsilane is used as an internal standard.

### 2.4. Melting point analysis

Melting points were determined in open-end capillary tubes on a Guna melting point apparatus with 130 watts, and 230 A/C volts, and were uncorrected.

## 3. Experimental Section

### 3.1. Synthesis of 1,3-dihydro-2H-benzo[d]imidazol-2-imine (C-A)

A 100 mL round bottom flask was charged with magnetic pellet, *o*-phenylene diamine (1g, 9.250 mmol), and dried toluene (30 mL). Then the round bottom flask was attached with a dropping funnel containing a dried toluene solution of cyanogen bromide (1.223g, 11.56

mmol). The whole setup was transferred to an oil bath at 110°C. After attending the 110°C temperature, dropwise addition of cyanogen bromide solution was started. Yellowish orange precipitate was formed instantaneously. This reaction was allowed to run overnight. The whole setup was allowed to cool at room temperature. The precipitate was filtered using a Buchner funnel followed by (3×10 mL) washings of diethyl ether to the precipitate and dried under vacuum. This precipitate was suspended in diethyl ether treated with an aqueous solution of potassium hydroxide (1.23 g, 21.98 mmol) at room temperature for 30 minutes. Finally, the product was extracted with diethyl ether (3 × 50 mL) and dried over anhydrous sodium sulphate, filtered and the solvent was evaporated under reduced pressure. The product 1,3-dihydro-2H-benzo[d]imidazol-2-imine was dried under vacuum. 1,3-dihydro-2H-benzo[d]imidazol-2-imine was isolated as a pale yellow solid (yield 88%). mp: 307-308°C <sup>1</sup>H NMR (400MHz, DMSO-d<sub>6</sub>): δ<sub>H</sub> 10.70(s, 1H), 7.13-7.15(t, 2H), 6.85-9.93(s, 2H), 6.13(s, 2H) <sup>13</sup>C NMR (100MHz, DMSO-d<sub>6</sub>): δ<sub>C</sub> 155.76, 135.40, 119.41, 117.76, 115.18.

### 3.2. Synthesis of 1H-perimidin-2(3H)-imine (C-B)

1H-perimidin-2(3H)-imine was synthesized using the same protocol as 1,3-dihydro-2H-benzo[d]imidazol-2-imine. 1H-perimidin-2(3H)-imine was isolated as reddish brown solid (yield 90%). mp: 244-245°C <sup>1</sup>H NMR (400MHz, DMSO-d<sub>6</sub>): δ<sub>H</sub> 9.67(s, 1H), 7.08-7.12(t, 2H), 6.90-6.92(d, 2H), 6.33-6.35(d, 2H), 5.92 (, 2H), <sup>13</sup>C NMR (100MHz, DMSO-d<sub>6</sub>): δ<sub>C</sub> 151.90, 143.09, 135.47, 128.62, 119.02, 116.45, 106.22.

### 3.3. Synthesis of N-(1,3-isopropyl perimidin-2-ylidene)-N'-p-tolylisoureate (C-D)

The 1,3-diisopropyl-1H-perimidin-2(3H)-imine (C-C) was synthesized using a methodology published in the literature. A solution of 5% excess para-tolyl isocyanate (0.133 g, 1 mmol) was dropwise added to a stirring suspension of C-C, (0.26 g, 1 mmol) in distilled toluene (20 ml). The resulting mixture was subsequently stirred for 24 hours at room temperature. The resultant solution was then evaporated under a vacuum to produce a pale yellow powder. The desired product was obtained with a 97% yield. The white block crystals were grown from slow diffusion pentane into a saturated solution of **1** in THF at -15 °C. mp: 253°C <sup>1</sup>H NMR (400MHz, CDCl<sub>3</sub>): δ<sub>H</sub> 7.25-7.35(d, 2H), 7.01-7.18(m, 4H), 6.90-6.94(m, 4H), 4.73-4.83(s, 2H), 2.23(s, 3H), 1.48-1.50(d, 12H), <sup>13</sup>C NMR (100MHz, CDCl<sub>3</sub>): δ<sub>C</sub> 157.55, 137.95, 135.67, 134.02, 131.43, 129.53, 129.28, 126.78, 120.52, 108.67, 54.17, 53.91, 20.81, 20.47, 20.13.

### 3.4. Synthesis of azide

In a 100-mL round, the bottom flask was charged magnetic pellet, aniline (1 g, 0.10 mol), and water (10 mL). Then 1.8 mL (0.21 mol) of concentrated HCl was added to the reaction mixture in an ice bath. Following 20–30 minutes of stirring and cooling to 0°C, a freshly prepared, ice-cold solution of NaNO<sub>2</sub> (0.7408 g, 0.10 mol) in water (10 mL) was added dropwise to the reaction mixture while maintaining the ice bath. After the addition of NaNO<sub>2</sub>(aqueous), the reaction mixture was stirred for an additional 10 min. A freshly prepared solution of sodium azide (0.698 g, 0.10 mol) in water (10 mL) was added dropwise to the reaction mixture via an additional funnel while maintaining the internal temperature of the reaction mixture below 5°C. Upon complete addition of the sodium azide solution, the reaction mixture was stirred for an additional 20–30 min at 0°C, followed by stirring at room temperature for another 3 h. The completion of the reaction was monitored by TLC. The reaction mixture was extracted with ethyl acetate (2 × 100 mL). The organic layer was removed under reduced pressure to get the crude product, which was further purified by silica gel chromatography (petroleum ether/ethyl acetate as eluent) to yield corresponding aromatic azide.

### **3.5. Optimization of catalyst, solvent, and base**

A solution of phenylacetylene (1 equiv) and benzyl azide (1 equiv) in the selected solvent (5 mL) was added to the active catalyst suspension (0.10 equiv) and the reaction mixture was stirred at 90°C for 24 h. The reaction was quenched by pouring into ice-cold water (20 mL) in a 100-mL Erlenmeyer flask. The extraction was carried out with ethyl acetate and dried over anhydrous Na<sub>2</sub>SO<sub>4</sub>. The solvent was removed under reduced pressure, the crude was purified by flash column chromatography over silica gel, using 10% EA/PET ether as eluent, to give the target compound.

### **3.6. Formation of active catalyst (C-A'-C-D')**

At ambient temperature, various N-heterocyclic imines (C-A/D) were suspended in dimethyl sulfoxide with sodium hydride (1:1) and stirred for 10 minutes resulting in an active imino catalysts (C-A'-C-D').

### **3.7. General procedures for imine-catalyzed triazoles synthesis from terminal alkynes and azides:**

To a solution of phenylacetylene (1 equiv) and benzyl azide (1 equiv) in DMSO (5 mL) treated with active catalyst suspension (0.10 equiv) the reaction mixture was stirred at 90°C for 24h. The reaction was quenched by pouring into ice-cold water (20 mL) in a 100-mL Erlenmeyer flask. The extraction was carried out with ethyl acetate and dried over anhydrous

Na<sub>2</sub>SO<sub>4</sub>. The solid was washed twice with petroleum ether to remove any traces of side products, unreacted-alkynes, and catalysts. The solvent was removed under reduced pressure, the crude was purified by flash column chromatography over silica gel, using 10% EA/PET ether as eluent, to give the target compound.

#### 4. Spectral data of the compounds

**1-benzyl-4-phenyl-1H-1,2,3-triazole (1a):** (table 1, entry 1) **1a** was isolated as a white crystalline solid (yield A'-71%, B'-84%, C'-91%, D'-87%). mp: 128-130°C. <sup>1</sup>H NMR (400 MHz, CDCl<sub>3</sub>): δ<sub>H</sub> 7.76–7.78(d, 2H), 7.64(s, 1H), 7.34–7.38(m, 5H), 7.23–7.28(m, 3H), 5.54(s, 2H). <sup>13</sup>C NMR (100 MHz, CDCl<sub>3</sub>): δ<sub>C</sub> 148.17, 134.63, 130.48, 129.08, 128.73, 128.70, 128.09, 127.98, 125.63, 119.46, 54.15.

**1-benzyl-4-(4-fluorophenyl)-1H-1,2,3-triazole (1b):** (table 1, entry 2). **1b** was isolated as a white solid (yield A'-74%, B'-79%, C'-86%, D'-84%). mp: 113-115°C. <sup>1</sup>H NMR (400 MHz, CDCl<sub>3</sub>): δ<sub>H</sub> 7.80-7.78(m, 2H), 7.71(s, 1H), 7.35-7.39(m, 3H), 7.30-7.32(m, 2H), 7.06-7.10(m, 2H), 5.55(s, 2H). <sup>13</sup>C NMR (100 MHz, CDCl<sub>3</sub>): δ<sub>C</sub> 163.84, 161.38, 147.27, 134.71, 129.14, 128.77, 128.04, 127.48, 127.40, 126.85, 119.53, 115.86, 115.64, 54.17.

**1-benzyl-4-(p-tolyl)-1H-1,2,3-triazole (1c):** (table 1, entry 3) **1c** was isolated as a white solid (yield A'-73%, B'-76%, C'-85%, D'-79%). mp: 113-115°C. <sup>1</sup>H NMR (400 MHz, CDCl<sub>3</sub>): δ<sub>H</sub> 7.64-7.70(m, 2H), 7.63(s, 1H), 7.27-7.36(m, 5H), 7.18-7.20(m, 2H), 5.52(s, 2H), 2.35 (s, 3H). <sup>13</sup>C NMR (100MHz, CDCl<sub>3</sub>): δ<sub>C</sub> 148.11, 137.83, 134.67, 129.34, 128.96, 128.67, 128.55, 127.62, 125.46, 119.16, 53.98, 21.12.

**1-benzyl-4-(4-methoxyphenyl)-1H-1,2,3-triazole (1d):** (table 1, entry 4) **1d** was isolated as a white solid (yield A'-74%, B'-83%, C'-90%, D'-89%). mp: 113-115°C. <sup>1</sup>H NMR (400 MHz, CDCl<sub>3</sub>): δ<sub>H</sub> 7.72-7.75(m, 2H), 7.60(s, 1H), 7.36-7.39(m, 3H), 7.30-7.32(m, 2H), 6.90-6.95(m, 2H), 5.55(s, 2H) 3.83(s, 3H). <sup>13</sup>C NMR (100 MHz, CDCl<sub>3</sub>): δ<sub>C</sub> 159.67, 148.14, 134.89, 129.18, 128.78, 128.10, 127.37, 123.37, 118.84, 114.28, 55.37, 54.22.

**2-(1-benzyl-1H-1,2,3-triazol-4-yl)pyridine (1e):** (table 1, entry 5) **1e** was isolated as a white solid (yield A'-75%, B'-78%, C'-88%, D'-81%). mp: 114-115°C. <sup>1</sup>H NMR (400 MHz, CDCl<sub>3</sub>): δ<sub>H</sub> 8.52(s,1H), 8.09-8.17(m, 2H), 7.73(s, 1H), 7.18-7.33(m, 6H), 5.56(s, 2H). <sup>13</sup>C NMR (100 MHz, CDCl<sub>3</sub>): δ<sub>C</sub> 150.02, 149.10, 148.47, 136.64, 134.20, 128.91, 128.68, 128.05, 122.63, 121.83, 119.99, 54.12.

**1-benzyl-4-(cyclohexyl)-1H-1,2,3-triazole (1f):** (table 1, entry 6) **1f** was isolated as a white solid (yield A'-73%, B'-77%, C'-83%, D'-81%). mp: 78-80°C. <sup>1</sup>H NMR (400 MHz, CDCl<sub>3</sub>): δ<sub>H</sub> 7.27-7.32(m, 3H), 7.15-7.24(m, 2H), 7.08(s, 1H), 5.39(s, 2H), 2.62-2.68(m, 1H), 1.93-

1.95(m, 2H), 1.68-1.69(m, 3H), 1.26-1.31(m, 4H), 1.12-1.14(m, 1H). <sup>13</sup>C NMR (100 MHz, CDCl<sub>3</sub>): δ<sub>C</sub> 154.17, 135.07, 129.01, 128.54, 127.97, 119.23, 53.94, 35.34, 32.99, 26.12, 26.03.

**1-benzyl-4-butyl-1H-1,2,3-triazole (1g):** (table 1, entry 7) **1g** was isolated as a white solid (yield A'-76%, B'-77%, C'-84%, D'-82%). mp: 82-84°C. <sup>1</sup>H NMR (400 MHz, CDCl<sub>3</sub>): δ<sub>H</sub> 7.34-7.38(m, 3H), 7.25-7.27(m, 2H), 7.16(s, 1H), 5.48(s, 2H), 2.67-2.71(t, 2H), 1.59-1.66(m, 2H), 1.31-1.41(m, 2H), 0.89-0.93(t, 3H). <sup>13</sup>C NMR (100 MHz, CDCl<sub>3</sub>): δ<sub>C</sub> 147.73, 134.39, 128.08, 126.90, 119.76, 52.89, 30.48, 24.37, 20.28, 12.86.

**1-benzyl-4-tert-butyl-1H-1,2,3-triazole (1h):** (table 1, entry 8) **1h** was isolated as a white solid (yield A'-72%, B'-75%, C'-79%, D'-76%). mp: 84-85°C. <sup>1</sup>H NMR (400 MHz, CDCl<sub>3</sub>): δ<sub>H</sub> 7.34-7.38(m, 3H), 7.25-7.29(m, 2H), 7.16(s, 1H), 5.48(s, 2H), 1.32(s, 9H). <sup>13</sup>C NMR (100 MHz, CDCl<sub>3</sub>): δ<sub>C</sub> 158.07, 134.47, 128.94, 128.46, 127.92, 120.80, 118.29, 105.38, 53.83, 30.68.

**2-(1-benzyl-1H-1,2,3-triazol-4-yl)ethan-1-ol (1i):** (table 1, entry 9) **1i** was isolated as a white solid (yield A'-70%, B'-72%, C'-76%, D'-74%). mp: 78-80°C. <sup>1</sup>H NMR (400 MHz, CDCl<sub>3</sub>): δ<sub>H</sub> 7.29(s, 1H), 7.19-7.22(m, 3H), 7.14-7.20(m, 2H), 5.35(s, 2H), 3.76(s, 2H), 2.79(s, 2H). <sup>13</sup>C NMR (100 MHz, CDCl<sub>3</sub>): δ<sub>C</sub> 146.05, 134.78, 129.03, 128.63, 128.02, 121.93, 61.28, 53.99, 28.89, 19.81.

**2-(1-benzyl-1H-1,2,3-triazol-4-yl)propan-2-ol (1j):** (table 1, entry 10) **1j** was isolated as a white solid (yield A'-71%, B'-73%, C'-78%, D'-75%). mp: 78-80°C. <sup>1</sup>H NMR (400 MHz, CDCl<sub>3</sub>): δ<sub>H</sub> 7.41(s, 1H), 7.31-7.35(m, 3H), 7.23-7.27(m, 2H), 5.45(s, 2H), 1.58(s, 6H). <sup>13</sup>C NMR (100 MHz, CDCl<sub>3</sub>): δ<sub>C</sub> 156.02, 134.46, 128.85, 128.46, 127.90, 119.16, 68.19, 53.86, 30.24.

**1,4-diphenyl-1H-1,2,3-triazole (2a):** (table 1, entry 11) **2a** was isolated as a white crystalline solid (yield A'-77%, B'-79%, C'-89%, D'-80%). mp: 183-184°C. <sup>1</sup>H NMR (400 MHz, CDCl<sub>3</sub>): δ<sub>H</sub> 8.12(s, 1H), 7.83-7.84(d, 2H), 7.70-7.72(d, 2H), 7.44-7.48(t, 2H), 7.27-7.39(m, 1H). <sup>13</sup>C NMR (100 MHz, CDCl<sub>3</sub>): δ<sub>C</sub> 147.40, 136.06, 129.24, 128.76, 127.90, 127.77, 127.41, 127.84, 119.51, 116.68, 116.59.

**1-naphthyl-4-phenyl-1H-1,2,3-triazole (3a):** (table 1, entry 12) **3a** was isolated as a white crystalline solid (yield A'-76%, B'-82%, C'-87%, D'-84%). mp: 183-184°C. <sup>1</sup>H NMR (400 MHz, CDCl<sub>3</sub>): δ<sub>H</sub> 7.97(s, 1H), 7.78-7.86(m, 4H), 7.53-7.55(d, 1H), 7.21-7.45(m, 8H). δ<sub>C</sub> 147.75, 134.19, 133.70, 130.46, 130.36, 129.02, 128.60, 128.45, 128.34, 127.93, 127.13, 125.92, 125.05, 123.56, 122.39.

**1-(4-methoxyphenyl)-4-phenyl-1H-1,2,3-triazole (4a):** (table 1, entry 13) **4a** was isolated as a white crystalline solid (yield A'-79%, B'-87%, C'-93%, D'-89%). mp: 183-184°C. <sup>1</sup>H NMR (400 MHz, CDCl<sub>3</sub>): δ<sub>H</sub> 8.11(s, 1H), 7.89-7.91(d, 2H), 7.66-7.69(d, 2H), 7.34-7.47(m, 3H), 7.02-7.04(d, 2H), 3.87(s, 3H). <sup>13</sup>C NMR (100 MHz, CDCl<sub>3</sub>): δ<sub>C</sub> 160.03, 148.42, 130.76, 130.48, 129.03, 128.45, 125.95, 122.31, 117.98, 114.86, 55.77.

**1-(4-tolyl)-4-phenyl-1H-1,2,3-triazole (5a):** (table 1, entry 14) **5a** was isolated as a white crystalline solid (yield A'-71%, B'-73%, C'-82%, D'-77%). mp: 183-184°C. <sup>1</sup>H NMR (400 MHz, CDCl<sub>3</sub>): δ<sub>H</sub> 8.15(s, 1H), 7.90-7.92(d, 2H), 7.66-7.68(d, 2H), 7.44-7.48(t, 2H), 7.33-7.39(m, 3H), 2.44 (s, 3H). <sup>13</sup>C NMR (100 MHz, CDCl<sub>3</sub>): δ<sub>C</sub> 148.53, 139.06, 135.00, 130.42, 120.33, 129.10, 128.51, 126.00, 120.69, 117.85, 21.20.

**1-(3-tolyl)-4-phenyl-1H-1,2,3-triazole (6a):** (table 1, entry 15) **6a** was isolated as a white crystalline solid (yield A'-80%, B'-83%, C'-86%, D'-86%). mp: 183-184°C. <sup>1</sup>H NMR (400 MHz, CDCl<sub>3</sub>): δ<sub>H</sub> 8.10(s, 1H), 7.83-7.85(d, 2H), 7.50(s, 1H), 7.34-7.40(d, 1H), 7.20-7.34(m, 4H), 7.18-7.31(t, 1H), 2.39(s, 3H). <sup>13</sup>C NMR (100 MHz, CDCl<sub>3</sub>): δ<sub>C</sub> 148.75, 140.38, 137.49, 130.62, 129.87, 129.86, 129.24, 128.72, 126.18, 121.54, 118.00, 117.93, 21.68.

**1-(2-tolyl)-4-phenyl-1H-1,2,3-triazole (7a):** (table 1, entry 16) **7a** was isolated as a white crystalline solid (yield A'-70%, B'-72%, C'-77%, D'-74%). mp: 183-184°C. <sup>1</sup>H NMR (400 MHz, CDCl<sub>3</sub>): δ<sub>H</sub> 7.96(s, 1H), 7.90-7.93(d, 2H), 7.33-7.48(m, 7H), 2.27 (s, 3H). <sup>13</sup>C NMR (100 MHz, CDCl<sub>3</sub>): δ<sub>C</sub> 147.46, 136.54, 136.46, 133.91, 133.81, 133.55, 131.55, 130.45, 129.93, 128.95, 128.35, 126.35, 126.00, 125.83, 121.16, 18.07.

**1-(2,4,6-mesityl)-4-phenyl-1H-1,2,3-triazole (8a):** (table 1, entry 17) **8a** was isolated as a white crystalline solid (yield A'-71%, B'-73%, C'-76%, D'-73%). mp: 183-184°C. <sup>1</sup>H NMR (400 MHz, CDCl<sub>3</sub>): δ<sub>H</sub> 7.90-7.94 (d, 2H), 7.83(s, 1H), 7.44-7.48(d, 2H), 7.35-7.42(m, 1H), 2.37 (s, 3H) 2.02 (s, 6H). <sup>13</sup>C NMR (100 MHz, CDCl<sub>3</sub>): δ<sub>C</sub> 147.59, 140.10, 135.14, 133.53, 130.53, 129.35, 129.13, 128.93, 128.28, 126.94, 125.77, 121.49.

**1-(4-fluorophenyl)-4-phenyl-1H-1,2,3-triazole (9a):** (table 1, entry 18) **9a** was isolated as a white crystalline solid (yield A'-73%, B'-77%, C'-84%, D'-79%). mp: 183-184°C. <sup>1</sup>H NMR (400 MHz, CDCl<sub>3</sub>): δ<sub>H</sub> 8.17(s, 1H), 7.89-7.92(d, 2H), 7.45-7.69(m, 4H), 7.36-7.40(m, 3H). <sup>13</sup>C NMR (100 MHz, CDCl<sub>3</sub>): δ<sub>C</sub> 133.14, 129.13, 128.74, 125.98, 122.56, 122.33, 117.49.

**1-(4-chlorophenyl)-4-phenyl-1H-1,2,3-triazole (10a):** (table 1, entry 19) **10a** was isolated as a white crystalline solid (yield A'-73%, B'-75%, C'-83%, D'-78%). mp: 183-184°C. <sup>1</sup>H NMR (400 MHz, CDCl<sub>3</sub>): δ<sub>H</sub> 8.17(s, 1H), 7.90-7.92(d, 2H), 7.75-7.77(d, 2H), 7.40-7.54(m, 4H), 7.26-7.40 (m, 1H). <sup>13</sup>C NMR (100 MHz, CDCl<sub>3</sub>): δ<sub>C</sub> 130.14, 129.13, 128.77, 126.04, 121.83, 117.57.



**1-(4-bromophenyl)-4-phenyl-1H-1,2,3-triazole (11a):** (table 1, entry 20) **11a** was isolated as a white crystalline solid (yield A'-70%, B'-71%, C'-75%, D'-75%). mp: 183-184°C. <sup>1</sup>H NMR (400 MHz, CDCl<sub>3</sub>): δ<sub>H</sub> 8.15(s, 1H), 7.90-7.92(d, 2H), 7.45-7.49(m, 2H), 7.36-7.40(m, 3H), 7.20-7.26 (m, 3H). <sup>13</sup>C NMR (100 MHz, CDCl<sub>3</sub>): δ<sub>C</sub> 161.41, 130.14, 129.11, 128.69, 125.96, 117.77, 117.11, 116.80.

**1-(4-nitrophenyl)-4-phenyl-1H-1,2,3-triazole (12a):** (table 1, entry 21) **12a** was isolated as a white crystalline solid (yield A'-71%, B'-74%, C'-80%, D'-76%). mp: 183-184°C. <sup>1</sup>H NMR (400 MHz, CDCl<sub>3</sub>): δ<sub>H</sub> 8.44-8.47(d, 2H) 8.30(s, 1H), 8.04-8.06(d 2H) 7.92-7.93(d, 2H), 7.40-7.51(m, 3H). <sup>13</sup>C NMR (100 MHz, CDCl<sub>3</sub>): δ<sub>C</sub> 164.33, 161.68, 147.48, 137.02, 129.82, 128.86, 127.59, 127.49, 126.49, 120.56, 117.37, 116.06, 115.84.

**1-(3-nitrophenyl)-4-phenyl-1H-1,2,3-triazole (13a):** (table 1, entry 22) **13a** was isolated as a white crystalline solid (yield A'-72%, B'-73%, C'-78%, D'-75%). mp: 183-184°C. <sup>1</sup>H NMR (400 MHz, CDCl<sub>3</sub>): δ<sub>H</sub> 8.12(s, 1H), 7.70-7.84 (d, 2H), 7.44-7.48(d, 2H), 7.18-7.39(m, 5H). <sup>13</sup>C NMR (100 MHz, CDCl<sub>3</sub>): δ<sub>C</sub> 137.94, 131.19, 129.70, 129.21, 129.04, 126.09, 126.04, 123.35, 117.41, 115.26.

**1-(2-nitrophenyl)-4-phenyl-1H-1,2,3-triazole (14a):** (table 1, entry 23) **14a** was isolated as a white crystalline solid (yield A'-69%, B'-71%, C'-74%, D'-72%). mp: 183-184°C. <sup>1</sup>H NMR (400 MHz, CDCl<sub>3</sub>): δ<sub>H</sub> 8.00 (s, 1H), 7.95-7.97(d, 1H), 7.80-7.95(d, 2H), 7.78-7.80(m, 1H), 7.67-7.71 (m, 2H), 7.18-7.67 (m, 3H). <sup>13</sup>C NMR (100 MHz, CDCl<sub>3</sub>): δ<sub>C</sub> 148.41, 144.47, 134.00, 130.88, 130.26, 129.85, 129.04, 128.73, 127.91, 126.04, 125.66, 121.14.

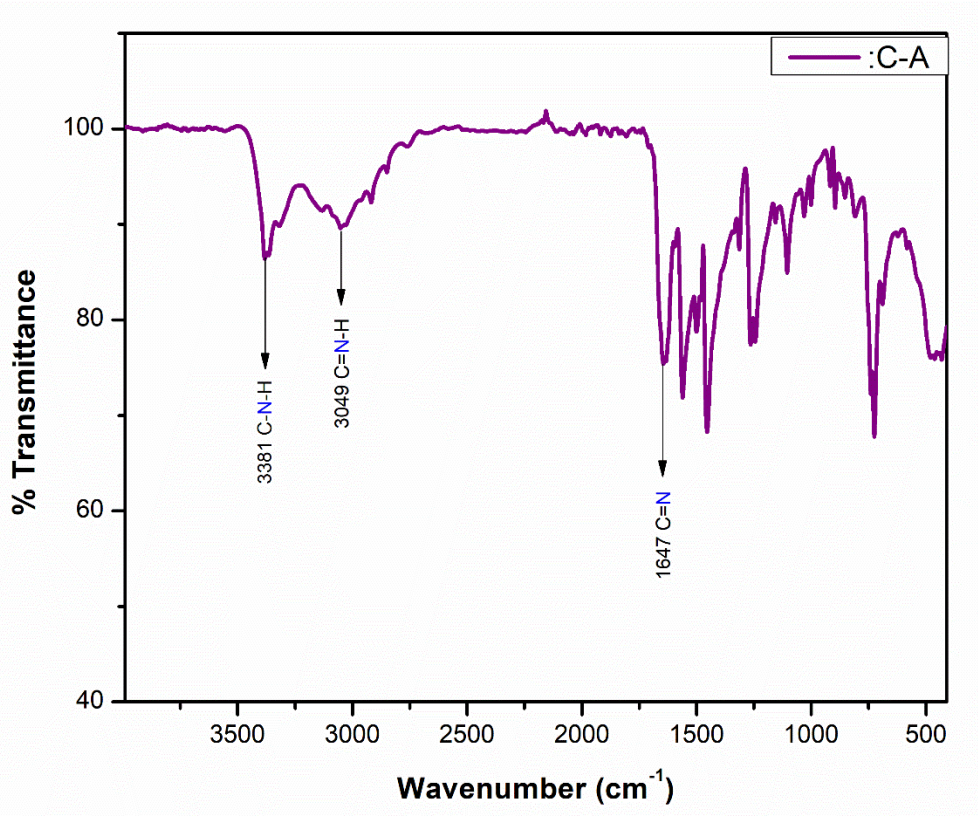

**Figure S1:** IR Spectrum of C-A.

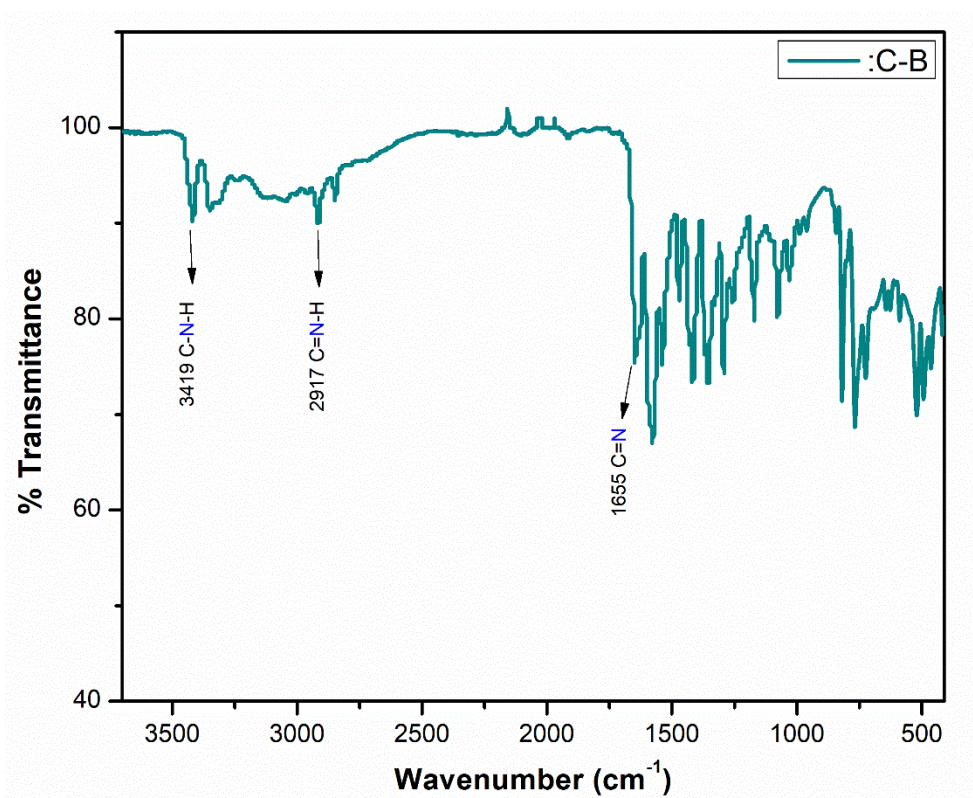

**Figure S2: IR Spectrum of C-B**

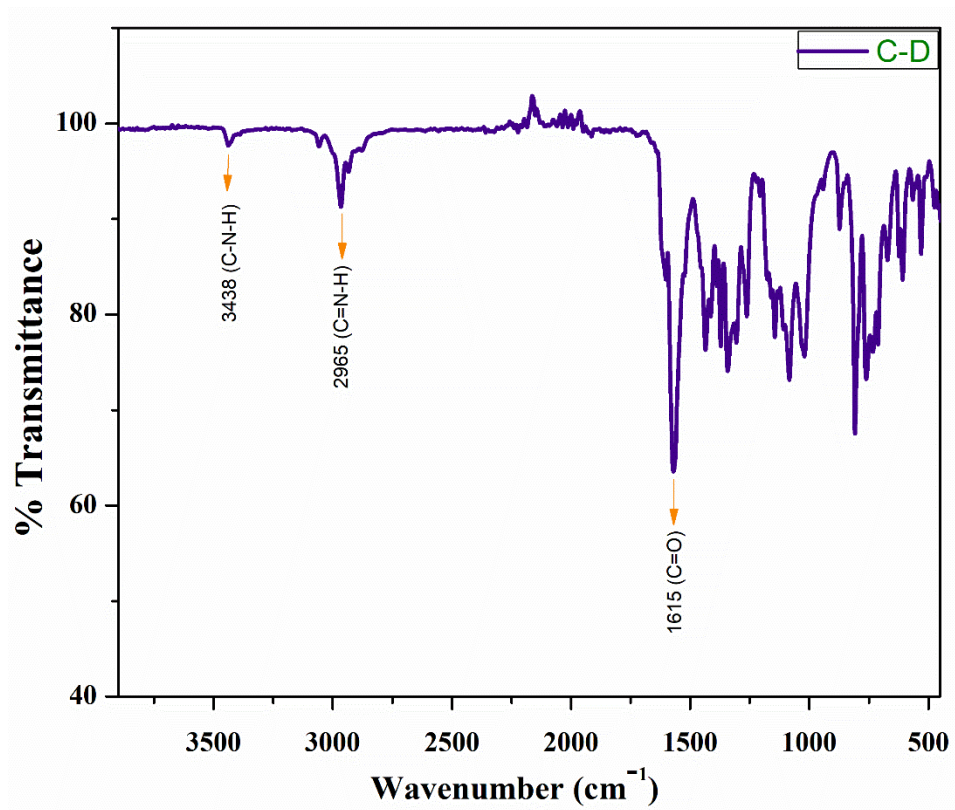

**Figure S3:** IR Spectrum of **C-D**

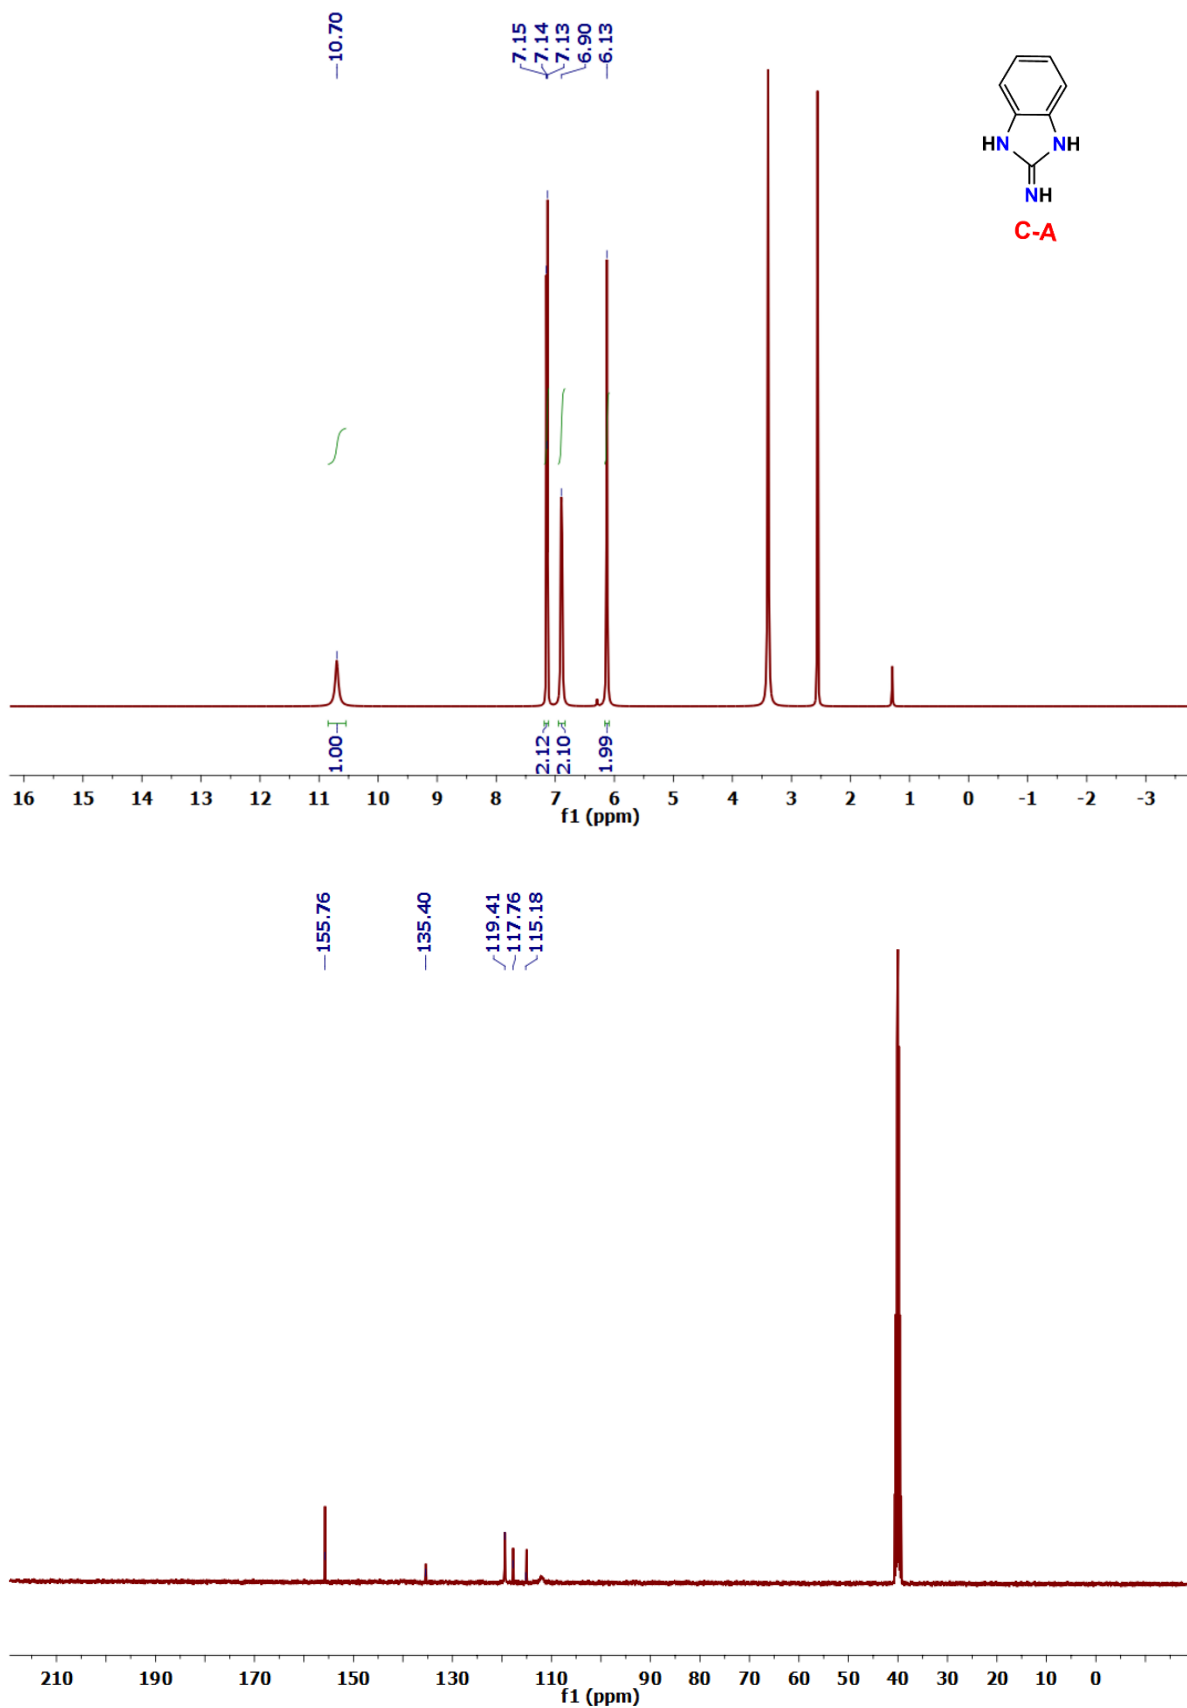

**Figure S4:**  $^1\text{H}$  and  $^{13}\text{C}$  NMR spectra of 1,3-dihydro-2H-benzo[d]imidazol-2-imine (C-A)

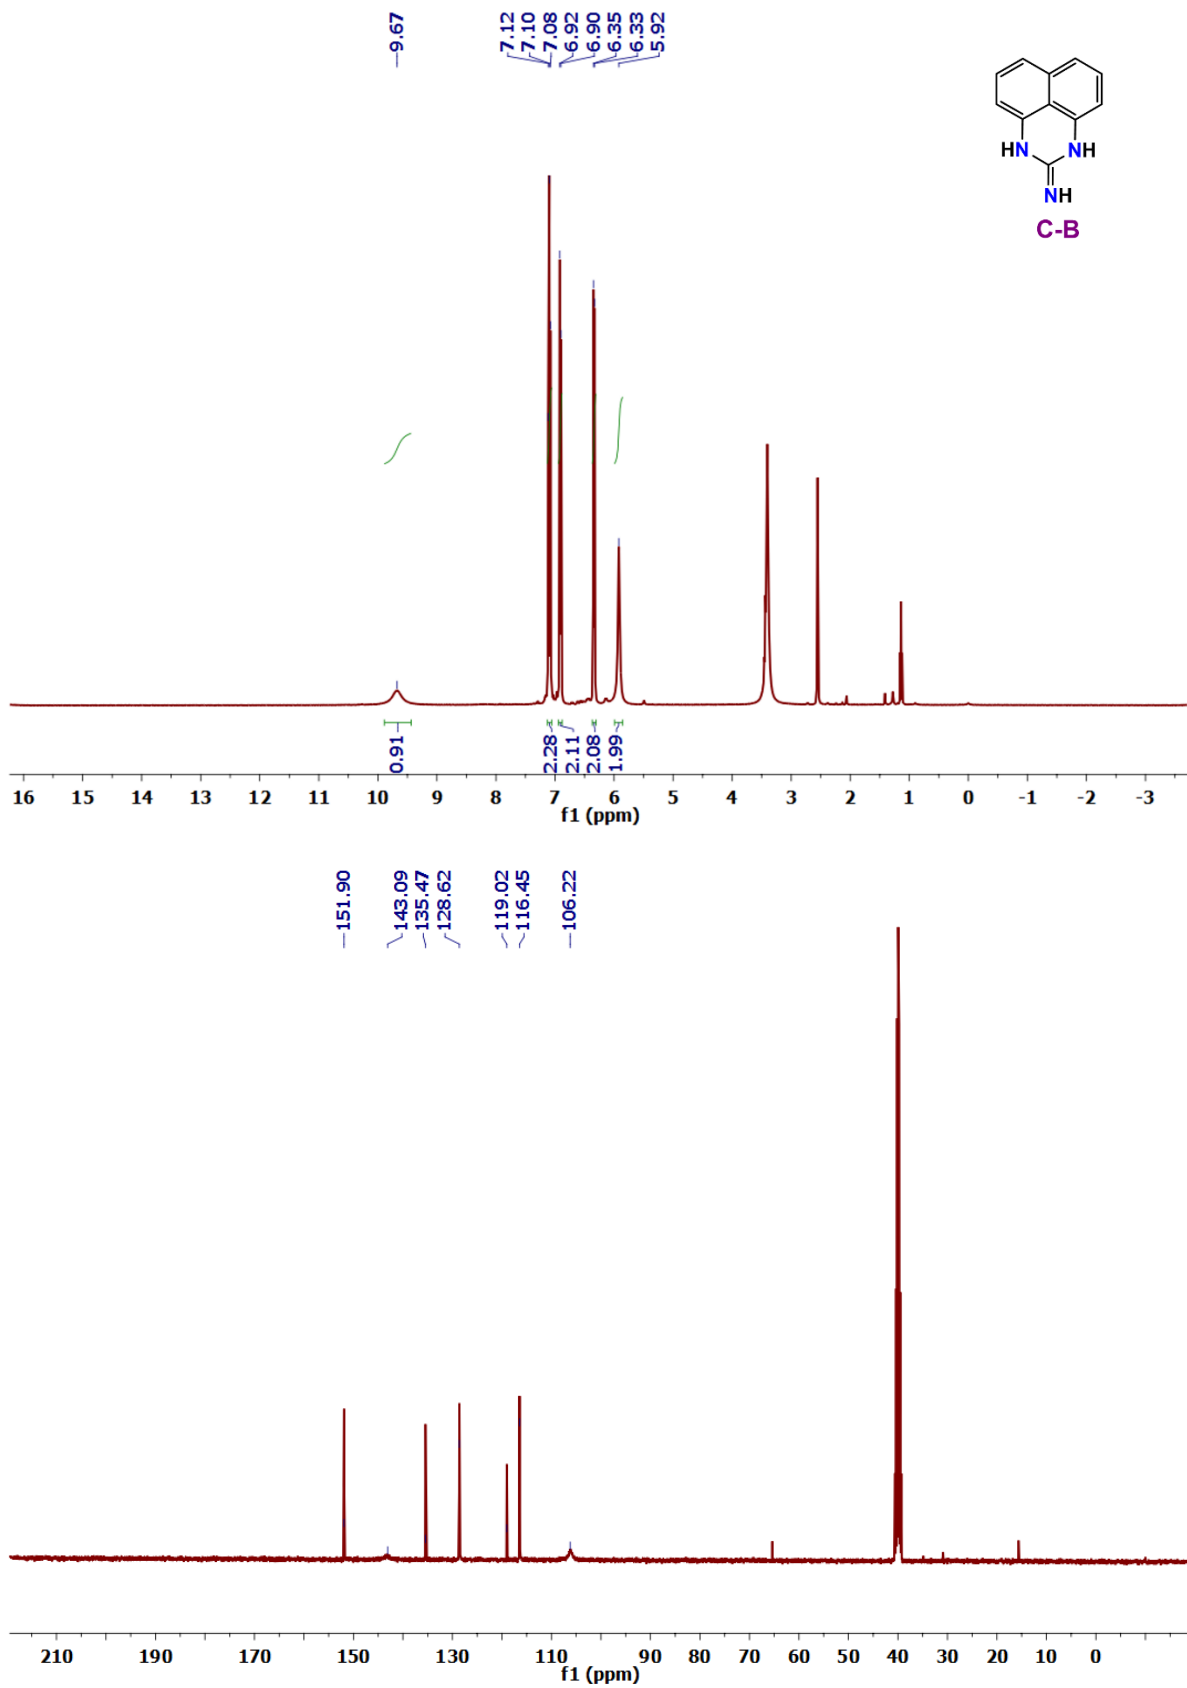

**Figure S5:** <sup>1</sup>H and <sup>13</sup>C NMR spectra of 1H-perimidin-2(3H)-imine (C-B)

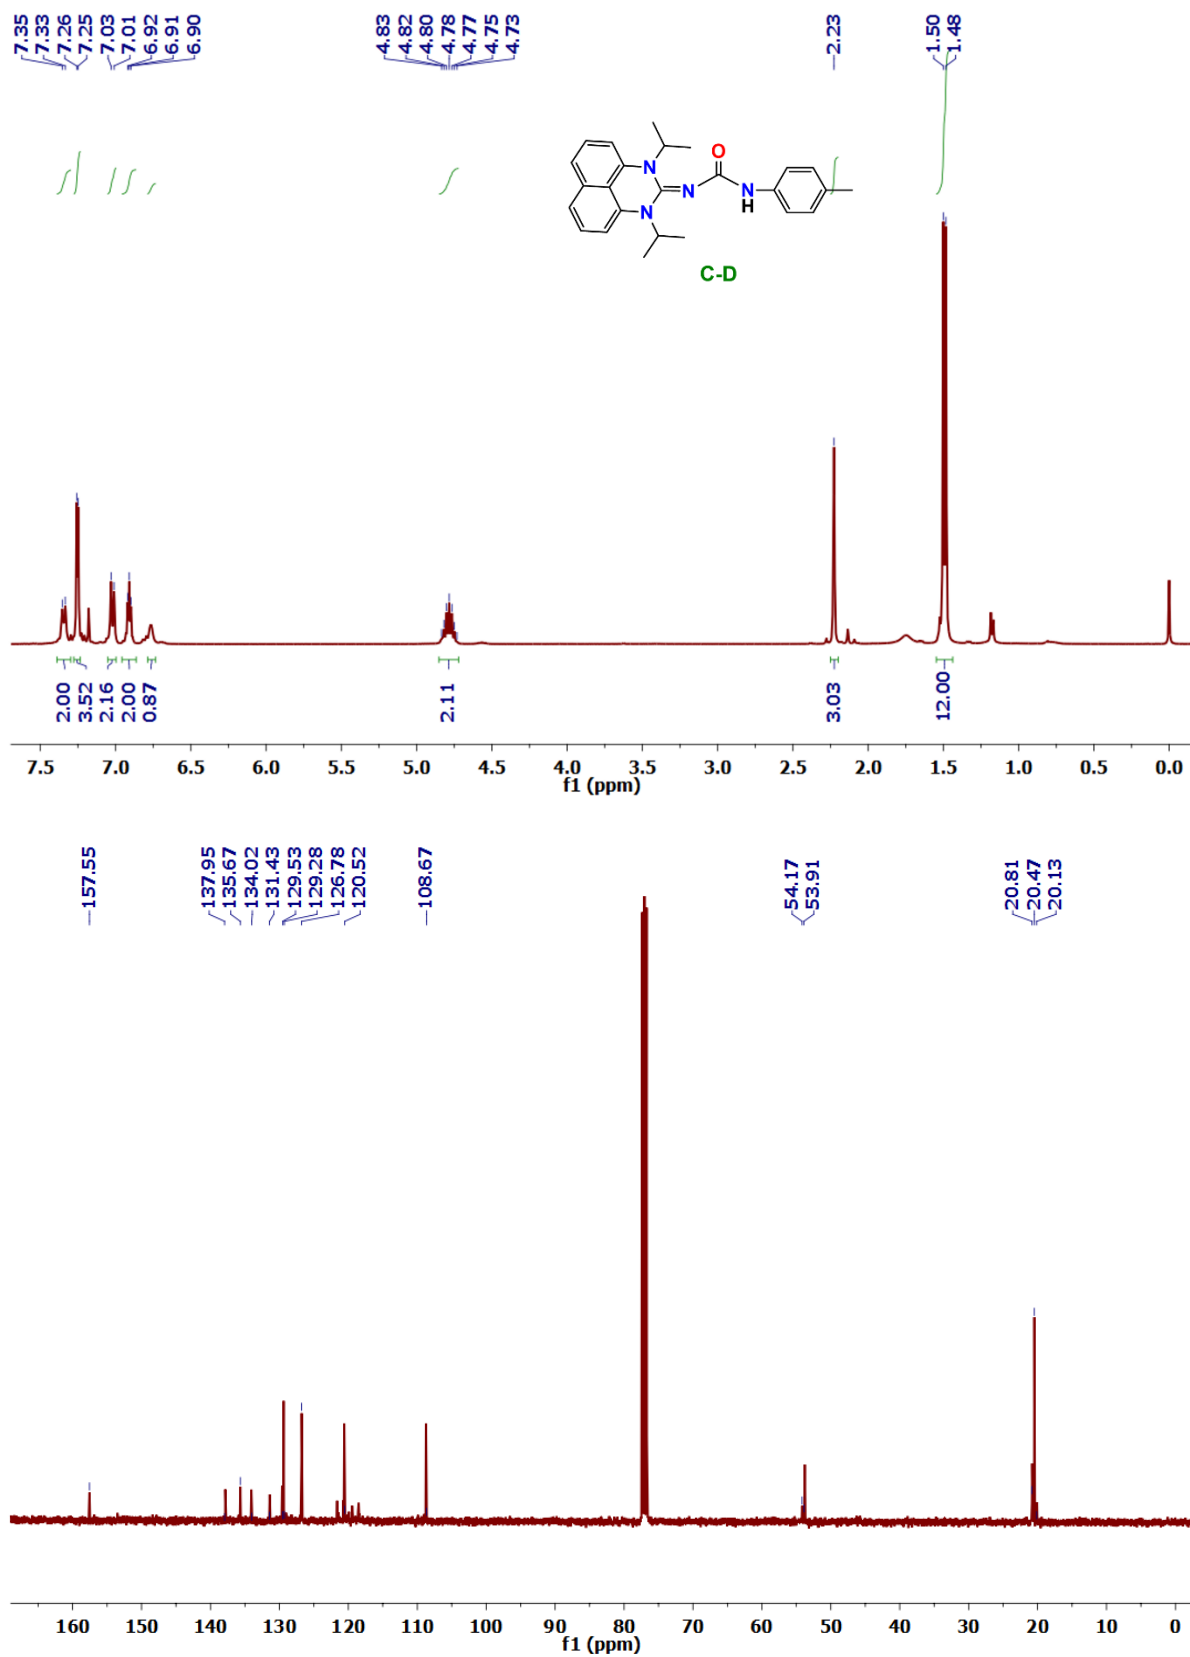

**Figure S6:**  $^1\text{H}$  and  $^{13}\text{C}$  NMR spectra of N,N-di-1,3-*i*Pr-perimidin-2-ylidene)-N'-*p*-tolylisoureate (**C-D**).

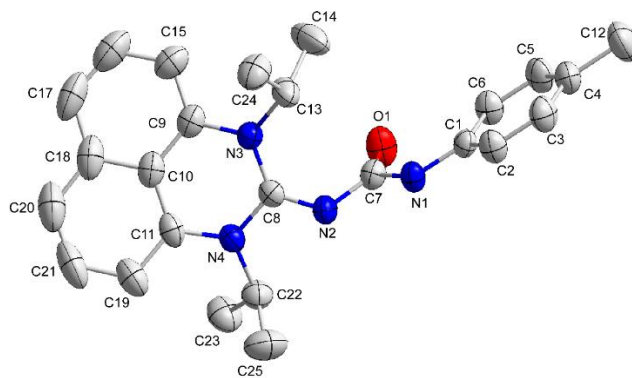

**Figure S7:** Molecular structure of compound **C-D** with thermal ellipsoid set at the 50% probability levels. All hydrogen atoms are omitted for clarity.



| <b>Table ST1: Crystal data and structure refinement parameters for C-D</b> |                                                  |
|----------------------------------------------------------------------------|--------------------------------------------------|
| Empirical formula                                                          | C <sub>25</sub> H <sub>28</sub> N <sub>4</sub> O |
| Formula weight (g mol <sup>-1</sup> )                                      | 400.51 g/mol                                     |
| Space group                                                                | P21/n                                            |
| Temperature                                                                | 301(2) K                                         |
| $\lambda$ (Å (Mo–K $\alpha$ ))                                             | 0.71073 Å                                        |
| Crystal system                                                             | Monoclinic                                       |
| a (Å)                                                                      | 8.0389(17) Å                                     |
| b (Å)                                                                      | 31.902 (7) Å                                     |
| c (Å)                                                                      | 9.109 (2) Å                                      |
| $\alpha$ (°)                                                               | 90°                                              |
| $\beta$ (°)                                                                | 109.917 (6)°                                     |
| $\gamma$ (°)                                                               | 90°                                              |
| V (Å <sup>3</sup> )                                                        | 2196.3(8)Å <sup>3</sup>                          |
| Z                                                                          | 4                                                |
| $\rho_{\text{calc}}$ (g cm <sup>-3</sup> )                                 | 1.211 g/cm <sup>3</sup>                          |
| Crystal size (mm)                                                          | 0.09 x 0.18 x 0.20 mm                            |
| F (000)                                                                    | 856                                              |
| Theta range for data collection                                            | 2.699 to 25.019°                                 |
| Index ranges                                                               | -9<=h<=9,<br>-37<=k<=37,<br>-10<=l<=10           |
| GOF <sup>a</sup> on F <sup>2</sup>                                         | 1.100                                            |
| R1 <sup>b</sup> [I[2 $\sigma$ (I)]]                                        | R1 = 0.0699                                      |
| R1 [all data]                                                              | R1 = 0.0457                                      |
| wR2 <sup>c</sup> [I[2 $\sigma$ (I)]]                                       | wR2 = 0.1192                                     |
| wR2 [all data]                                                             | wR2 = 0.1046                                     |
| CCDC                                                                       | <b>2278567</b>                                   |

| <b>Table ST2. Selected bond length (Å) for C-D</b> |                        |             |                        |
|----------------------------------------------------|------------------------|-------------|------------------------|
| <b>Bond</b>                                        | <b>Bond length (Å)</b> | <b>Bond</b> | <b>Bond length (Å)</b> |
| O1 C7                                              | 1.227(2)               | C1 C2       | 1.387(2)               |
| N1 C7                                              | 1.366(2)               | C1 C6       | 1.388(2)               |
| N1 C1                                              | 1.408(2)               | C2 C3       | 1.377(3)               |
| N2 C8                                              | 1.295(2)               | C3 C4       | 1.384(3)               |
| N2 C7                                              | 1.372(2)               | C4 C5       | 1.375(3)               |
| N3 C8                                              | 1.385(2)               | C4 C12      | 1.512(3)               |
| N3 C9                                              | 1.419(2)               | C5 C6       | 1.383(3)               |
| N3 C13                                             | 1.498(2)               | C9 C15      | 1.376(3)               |
| N4 C8                                              | 1.383(2)               | C9 C10      | 1.410(3)               |
| N4 C11                                             | 1.412(2)               | C10 C11     | 1.408(3)               |
| N4 C22                                             | 1.496(2)               | C10 C18     | 1.422(3)               |
| C13 C24                                            | 1.520(3)               | C11 C19     | 1.382(3)               |
| C13 C14                                            | 1.534(3)               | C17 C18     | 1.415(4)               |
| C15 C16                                            | 1.350(4)               | C18 C20     | 1.401(4)               |
| C16 C17                                            | 1.399(3)               | C19 C21     | 1.413(3)               |
| C20 C21                                            | 1.352(4)               | C22 C23     | 1.529(3)               |
| C22 C25                                            | 1.521(3)               |             |                        |

**Table ST3.** Selected bond angles (°) for **C-D**

| <b>Bond</b> | <b>Bond angle (°)</b> | <b>Bond</b> | <b>Bond angle (°)</b> |
|-------------|-----------------------|-------------|-----------------------|
| C7 N1 C1    | 128.24(15)            | C15 C9 C10  | 119.67(18)            |
| C8 N2 C7    | 126.23(15)            | C15 C9 N3   | 122.61(18)            |
| C8 N3 C9    | 120.79(14)            | C10 C9 N3   | 117.62(17)            |
| C8 N3 C13   | 118.68(14)            | C11 C10 C9  | 120.03(16)            |
| C9 N3 C13   | 119.45(15)            | C11 C10 C18 | 119.99(19)            |
| C8 N4 C11   | 121.48(15)            | C9 C10 C18  | 120.0(2)              |
| C8 N4 C22   | 116.36(14)            | C19 C11 C10 | 119.82(18)            |
| C11 N4 C22  | 122.11(14)            | C19 C11 N4  | 123.18(19)            |
| C2 C1 C6    | 118.27(16)            | C10 C11 N4  | 116.95(16)            |
| C2 C1 N1    | 117.08(15)            | N3 C13 C24  | 111.87(16)            |
| C6 C1 N1    | 124.64(16)            | N3 C13 C14  | 113.84(19)            |
| C3 C2 C1    | 120.87(17)            | C24 C13 C14 | 112.94(18)            |
| C2 C3 C4    | 121.57(18)            | C9 C15 C16  | 119.8(2)              |
| C5 C4 C3    | 116.90(17)            | C17 C16 C15 | 121.7(2)              |
| C5 C4 C12   | 121.34(19)            | C16 C17 C18 | 120.6(2)              |
| C3 C4 C12   | 121.8(2)              | C20 C18 C17 | 123.6(2)              |
| C4 C5 C6    | 122.84(18)            | C20 C18 C10 | 118.5(2)              |
| C5 C6 C1    | 119.54(17)            | C17 C18 C10 | 118.0(2)              |
| O1 C7 N1    | 123.18(16)            | C11 C19 C21 | 119.0(2)              |
| O1 C7 N2    | 124.19(16)            | C21 C20 C18 | 120.6(2)              |
| N1 C7 N2    | 112.46(15)            | C20 C21 C19 | 121.8(2)              |
| N2 C8 N4    | 117.04(15)            | N4 C22 C25  | 112.35(17)            |
| N2 C8 N3    | 125.10(15)            | N4 C22 C23  | 112.27(16)            |
| N4 C8 N3    | 117.80(15)            | C25 C22 C23 | 114.37(18)            |

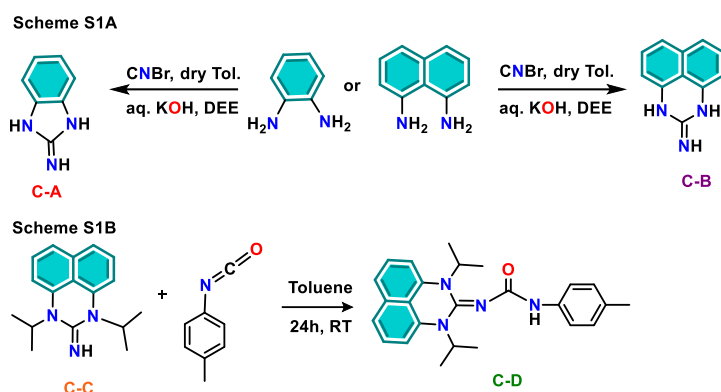

**Scheme S1:** Synthesis of various NHI pre-catalysts **C-A**, **C-B**, and **C-D**.

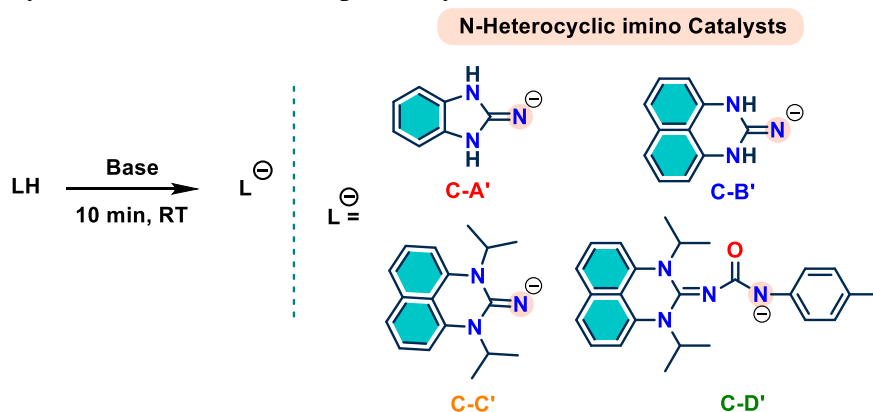

**Scheme S2:** Formation of active catalyst N-heterocyclic imino (**C-A'**-**C-D'**) from N-heterocyclic imine (**C-A-C-D**).

**Table ST4.** Optimization of the reaction conditions

| Entry | Precatalyst | Base               | Solvent     | Yield (%) |
|-------|-------------|--------------------|-------------|-----------|
| 1     | C-C         | —                  | DMSO        | 49        |
| 2     | C-A         | NaH                | DMSO        | 71        |
| 3     | C-B         | NaH                | DMSO        | 84        |
| 4     | <b>C-C</b>  | <b>NaH</b>         | <b>DMSO</b> | <b>91</b> |
| 5     | C-D         | NaH                | DMSO        | 87        |
| 6     | C-C         | <i>n</i> BuLi      | DMSO        | 81        |
| 7     | C-C         | KO <sup>t</sup> Bu | DMSO        | 0         |
| 8     | C-C         | KOH                | DMSO        | 21        |
| 9     | C-C         | NaH                | DMF         | 61        |
| 10    | C-C         | NaH                | Toluene     | >20       |

The reaction was carried out using a catalyst (**C-A-C-D**), phenylacetylene (1 mmol), and benzyl azide (1 mmol) in solvent (5 ml) at 90°C for 24h. Isolated yields after column chromatography.

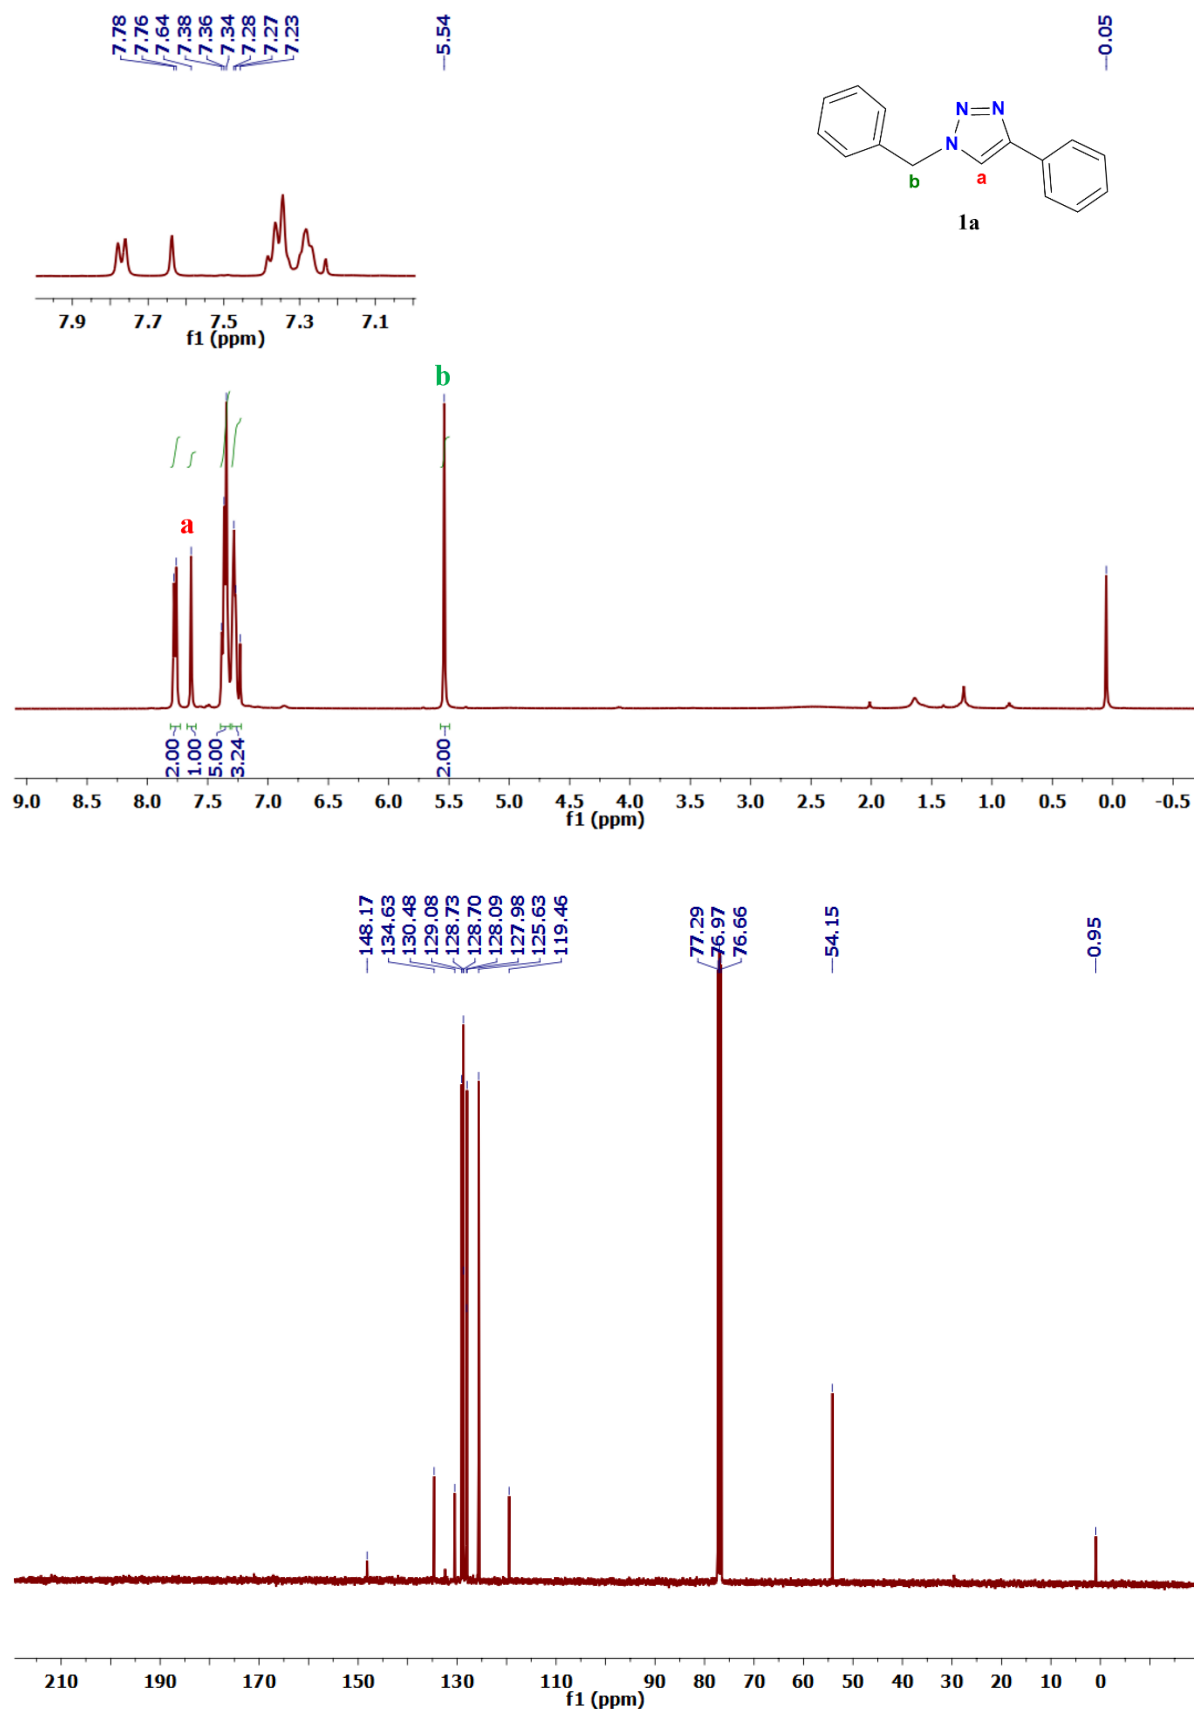

**Figure S8:** <sup>1</sup>H and <sup>13</sup>C NMR spectra of 1-benzyl-4-phenyl-1H-1,2,3-triazole (**1a**)

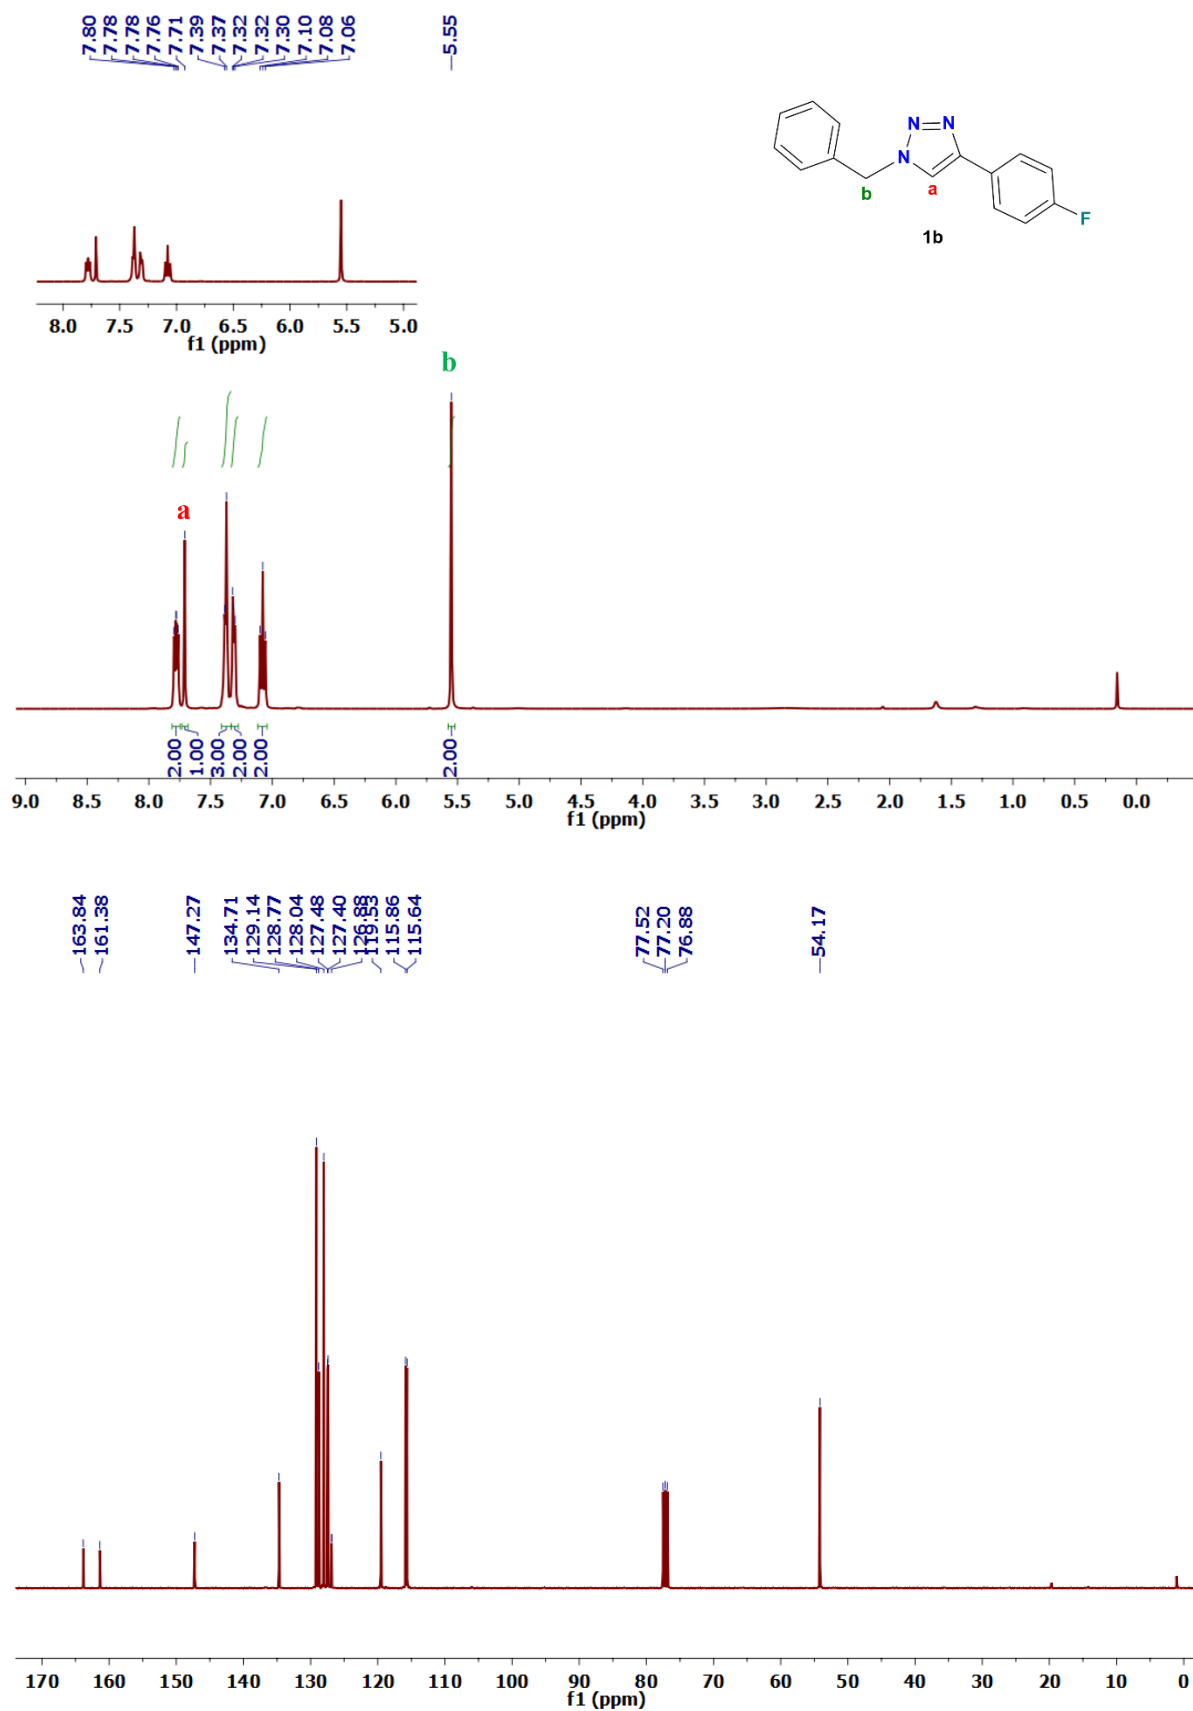

**Figure S9:** <sup>1</sup>H and <sup>13</sup>C NMR spectra of 1-benzyl-4-(4-fluorophenyl)-1H-1,2,3-triazole (**1b**)

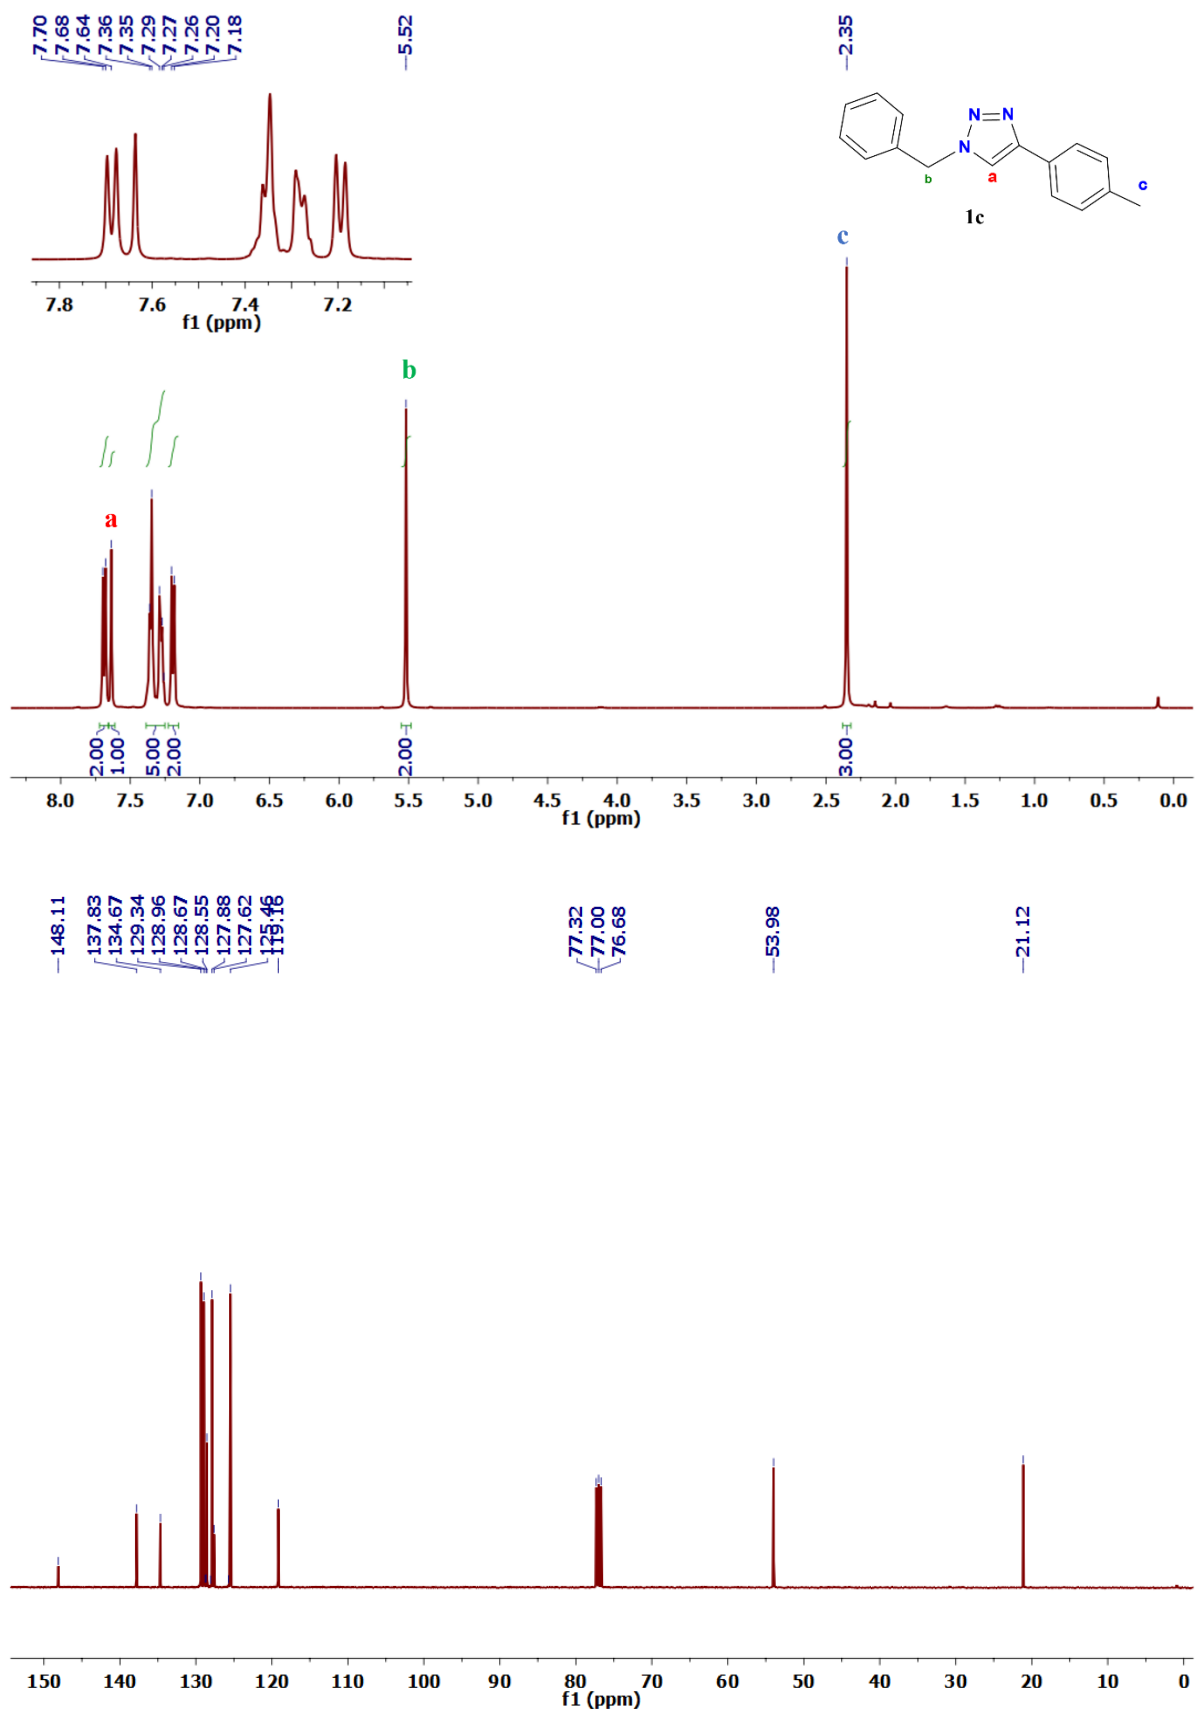

**Figure S10:** <sup>1</sup>H and <sup>13</sup>C NMR spectra of 1-Benzyl-4-(p-tolyl)-1H-1,2,3-triazole (**1c**)

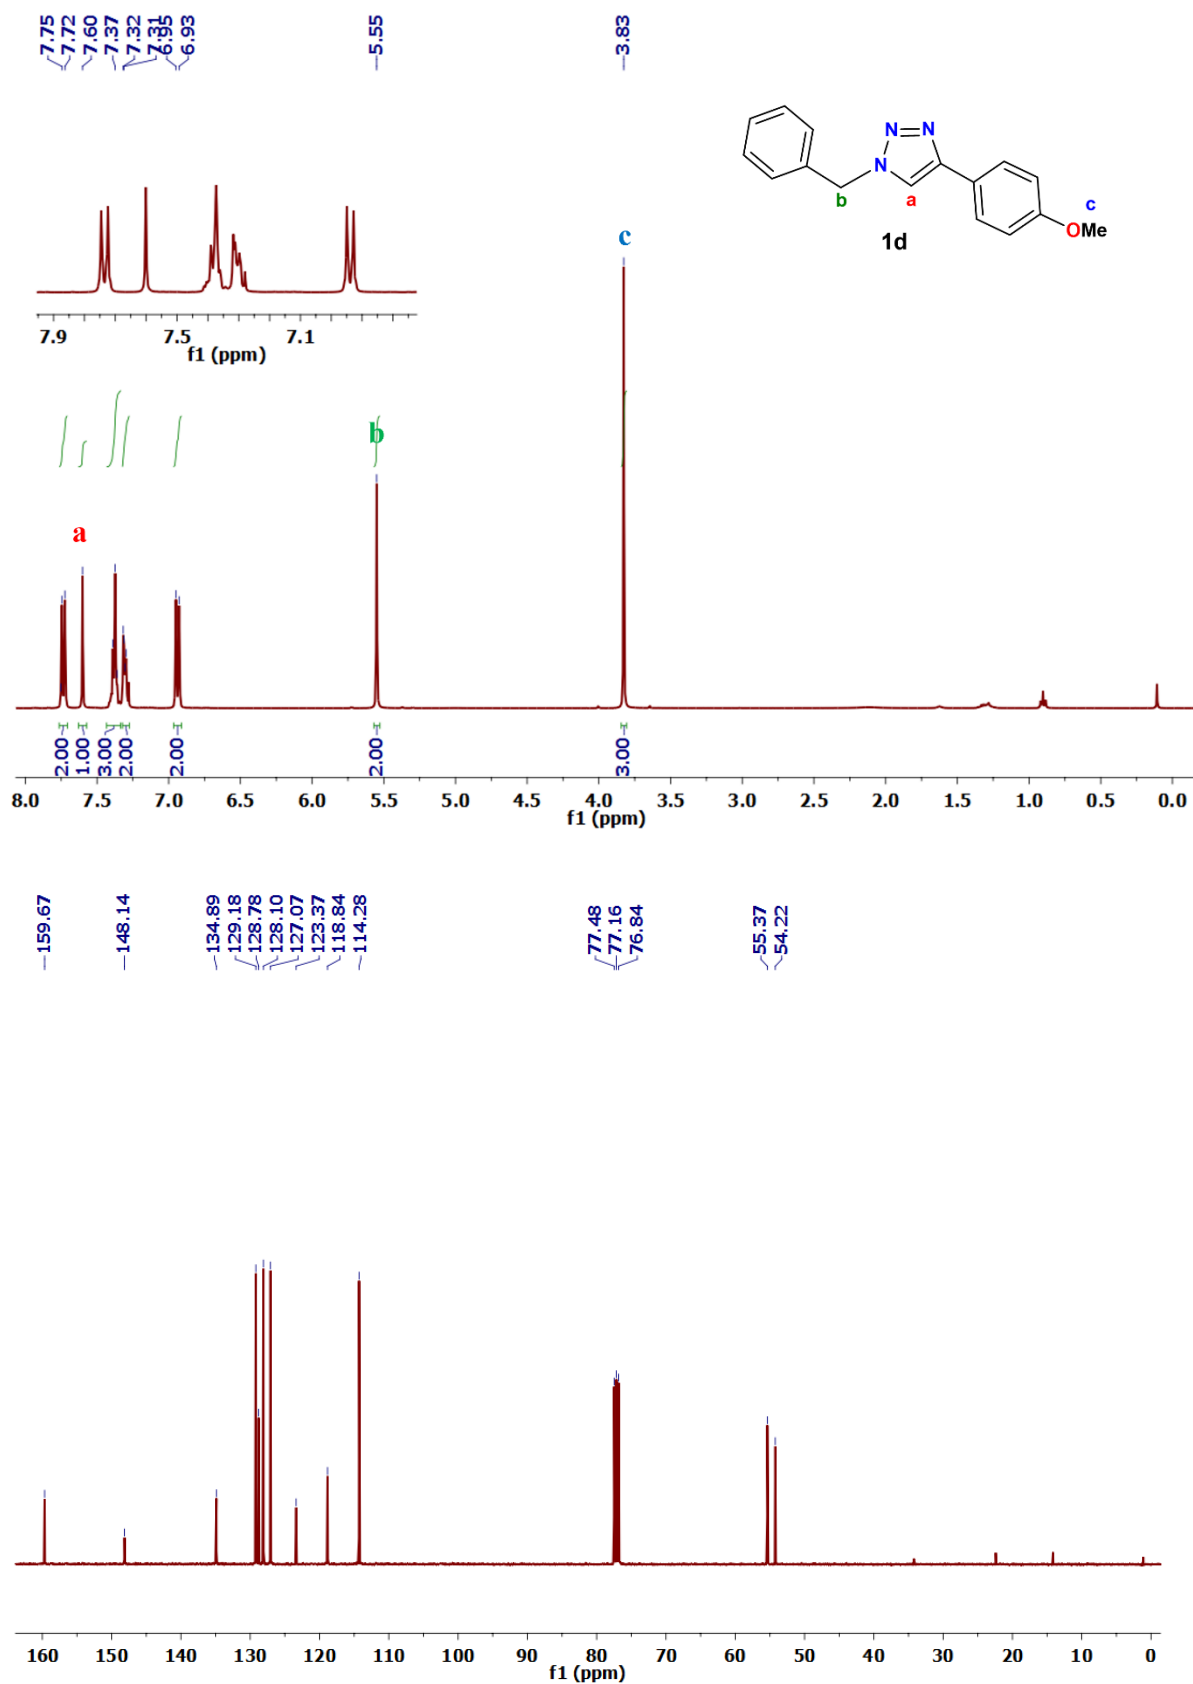

**Figure S11:** <sup>1</sup>H and <sup>13</sup>C NMR spectra of 1-benzyl-4-(4-methoxyphenyl)-1H-1,2,3-triazole (1d)



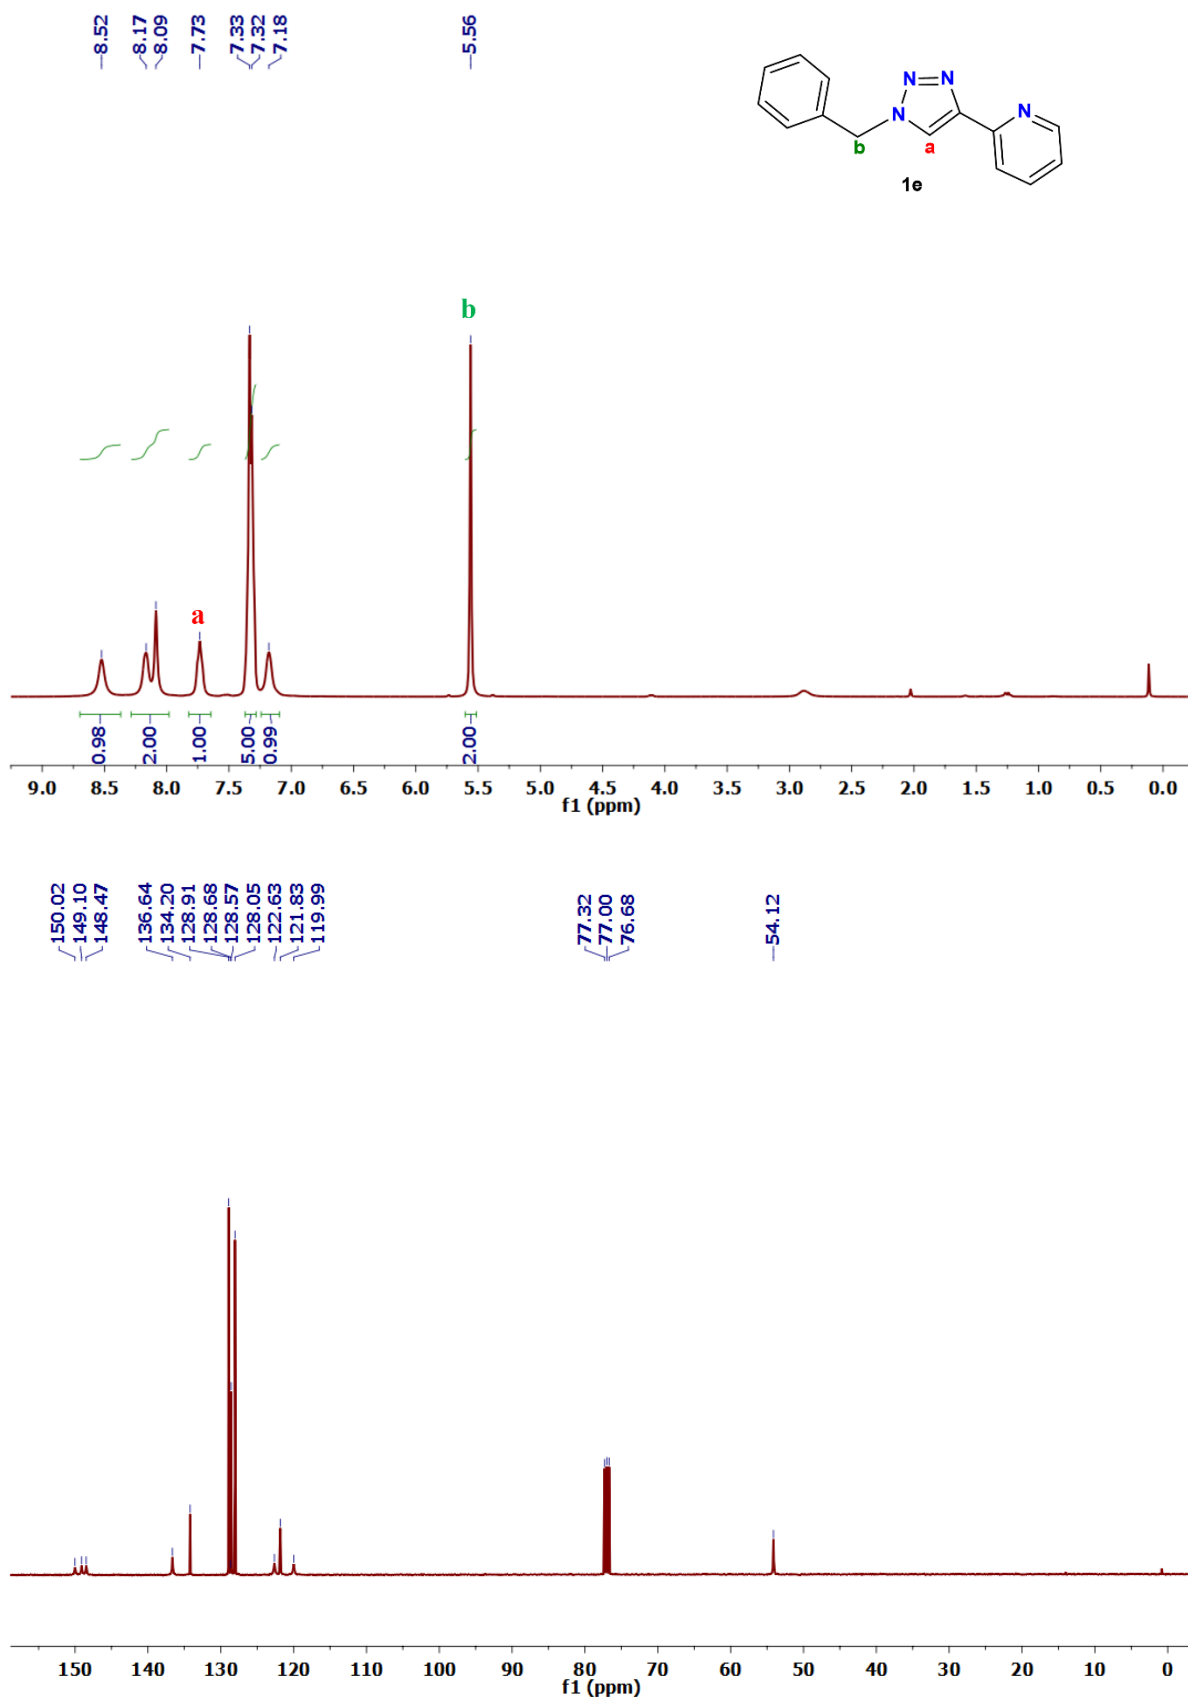

**Figure S12:** <sup>1</sup>H and <sup>13</sup>C NMR spectra of 2-(1-benzyl-1H-1,2,3-triazol-4-yl) pyridine (**1e**)

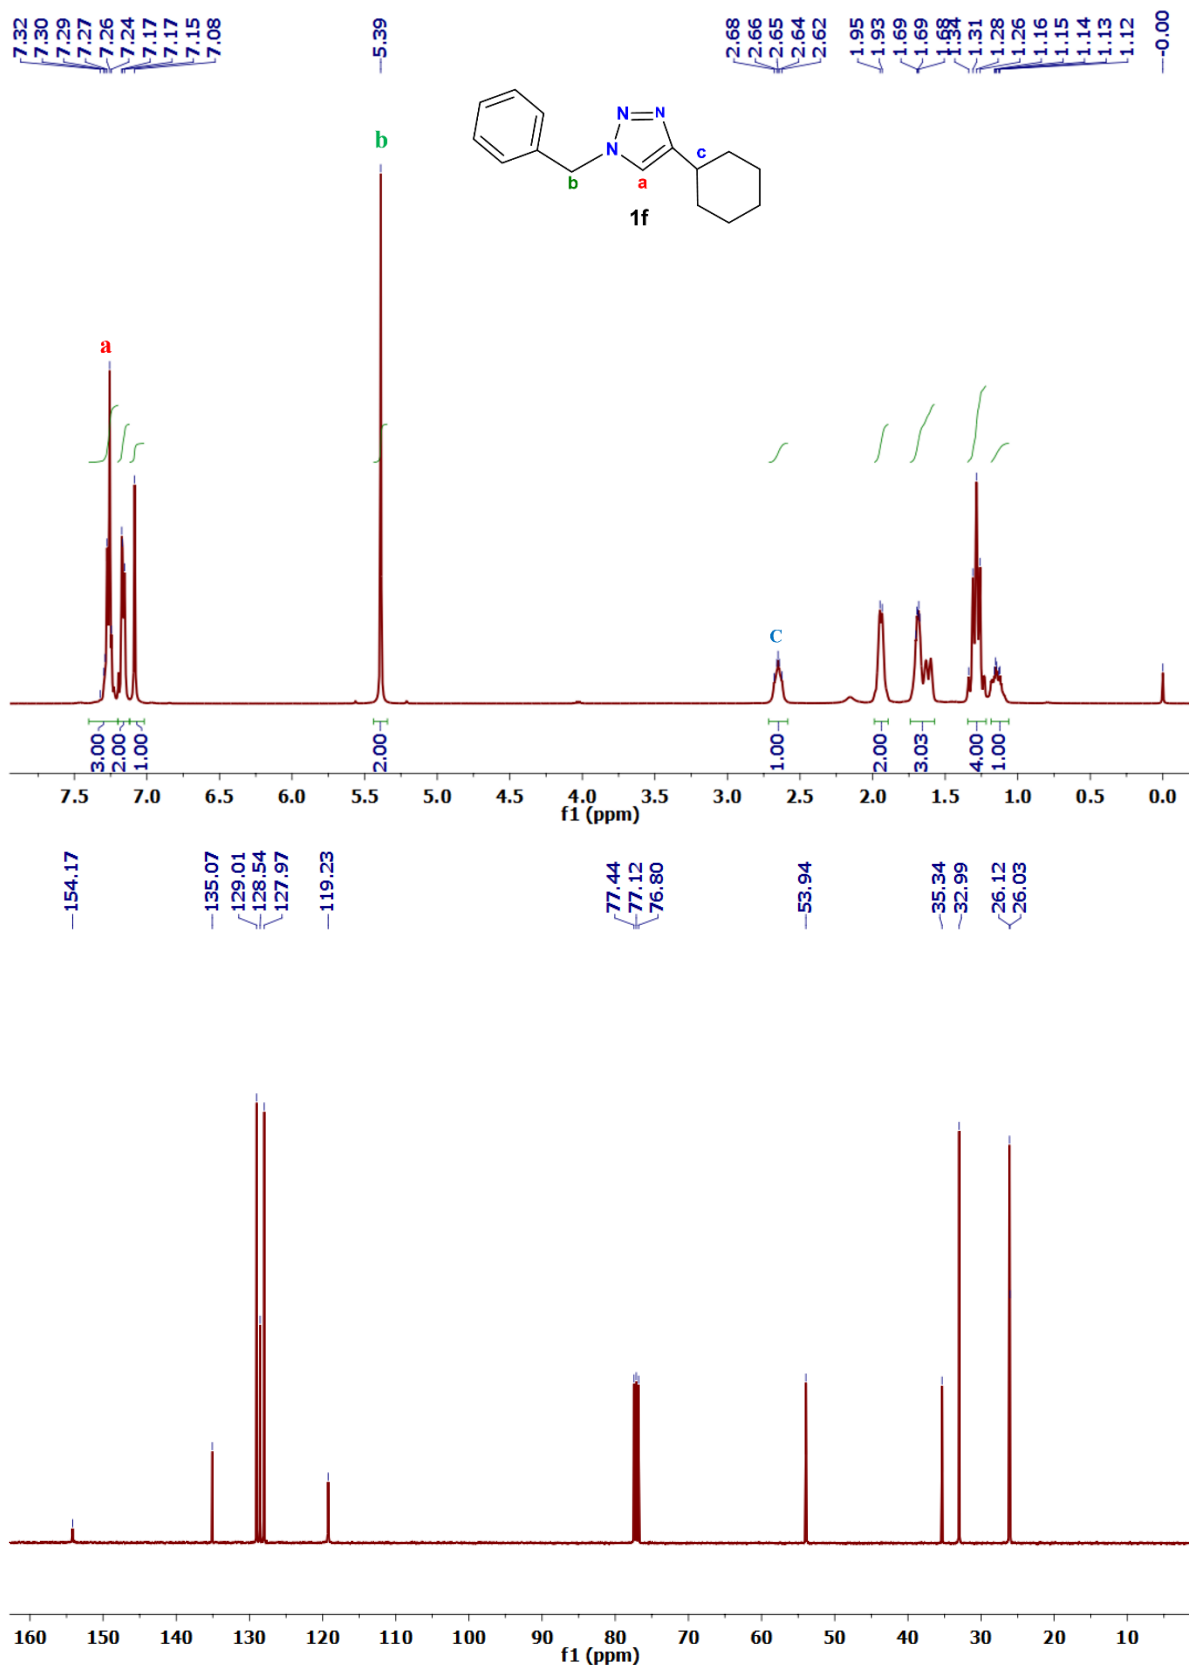

**Figure S13:** <sup>1</sup>H and <sup>13</sup>C NMR spectra of 1-benzyl-4-butyl-1H-1,2,3-triazole (**1f**)

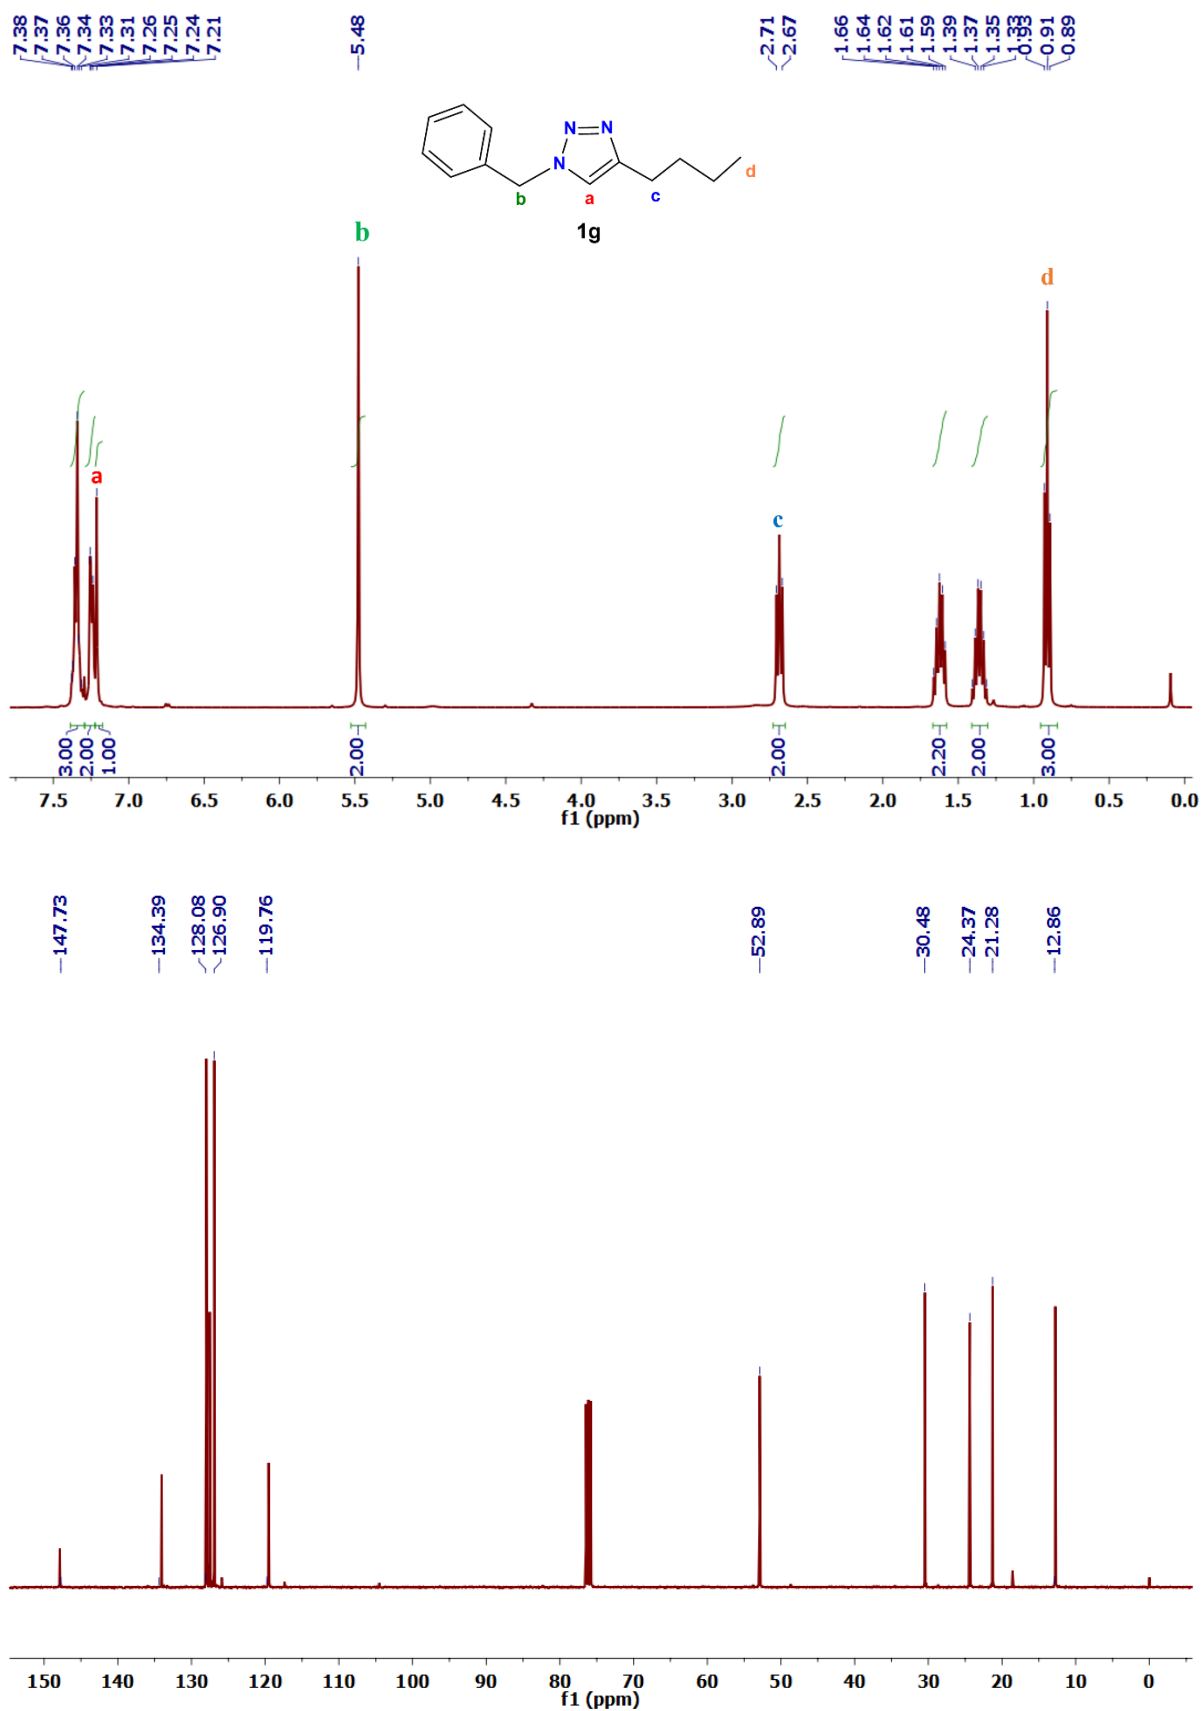

**Figure S14:** <sup>1</sup>H and <sup>13</sup>C NMR spectra of 1-benzyl-4-tert-butyl-1H-1,2,3-triazole (**1g**)

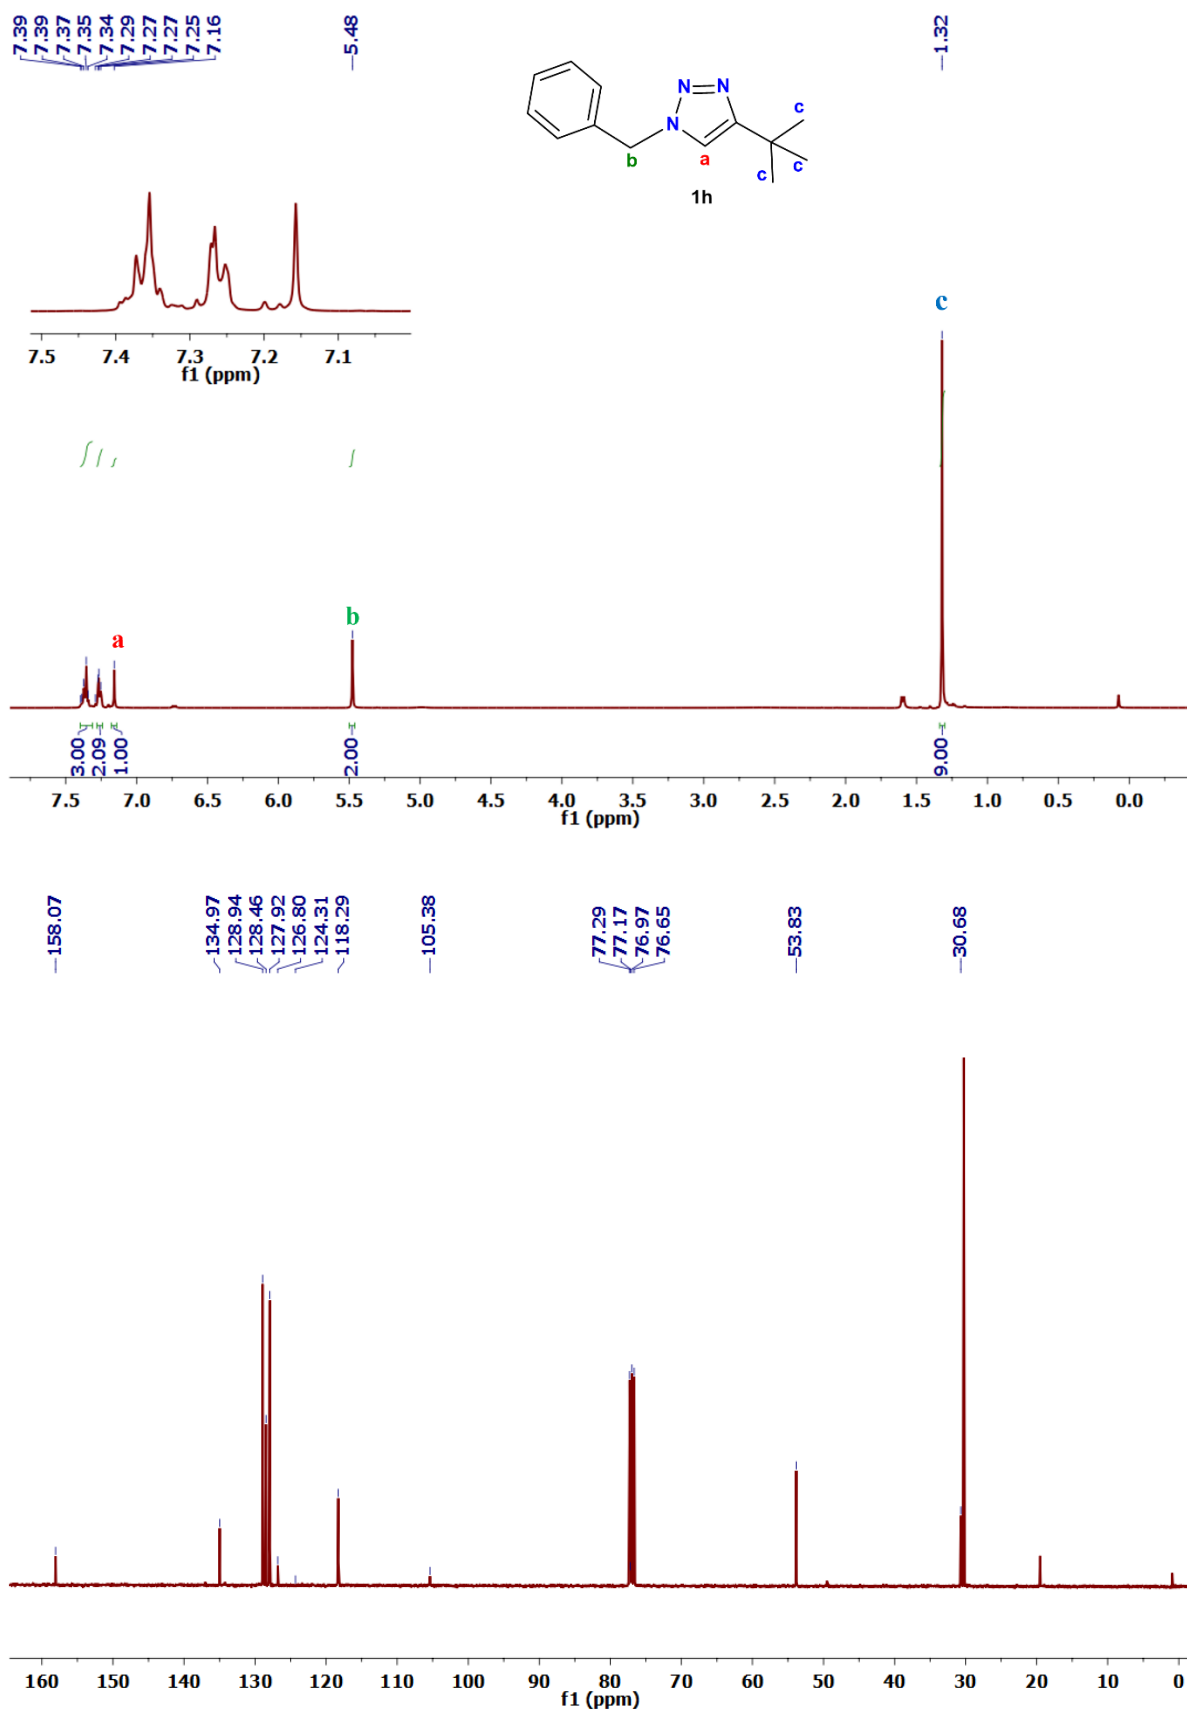

Figure S15: <sup>1</sup>H and <sup>13</sup>C NMR spectra of 1-benzyl-4-(cyclohexyl)-1H-1,2,3-triazole (**1h**)

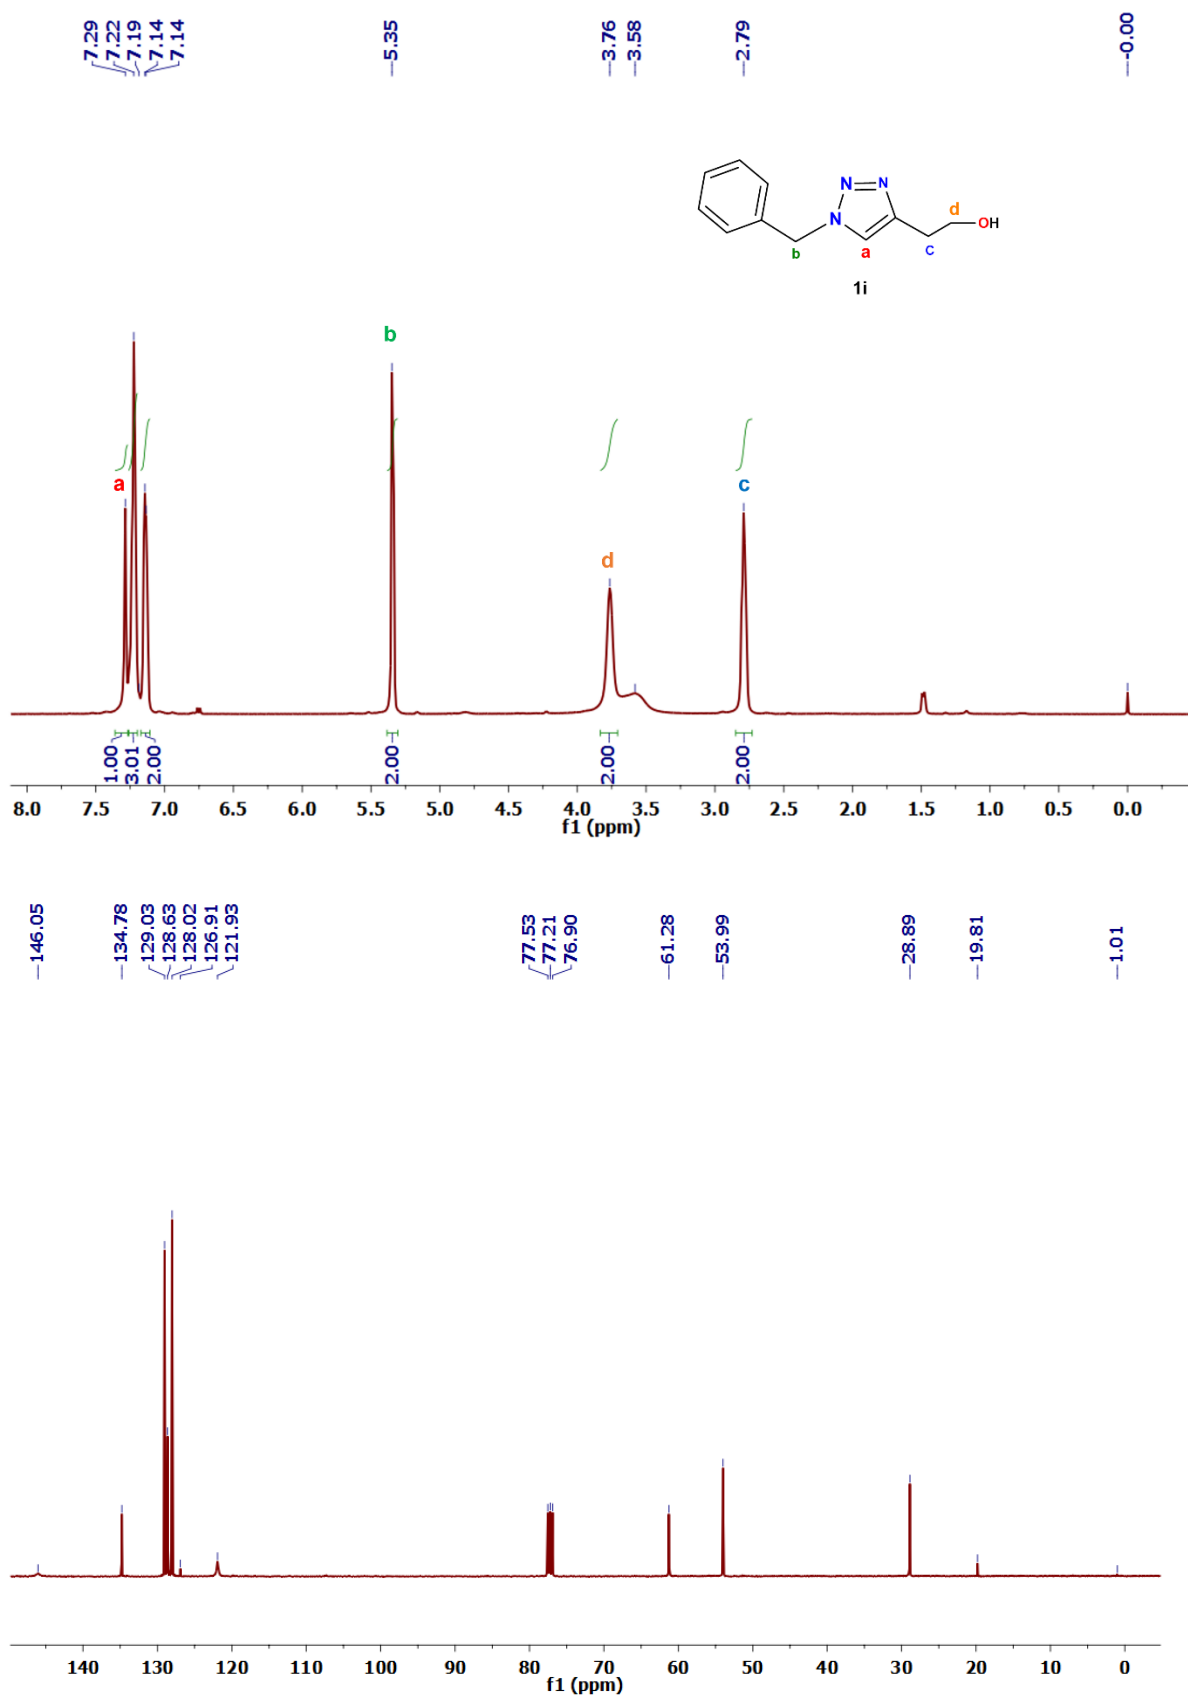

**Figure S16:** <sup>1</sup>H and <sup>13</sup>C NMR spectra of 2-(1-benzyl-1H-1,2,3-triazol-yl)ethan-1-ol (**1i**)

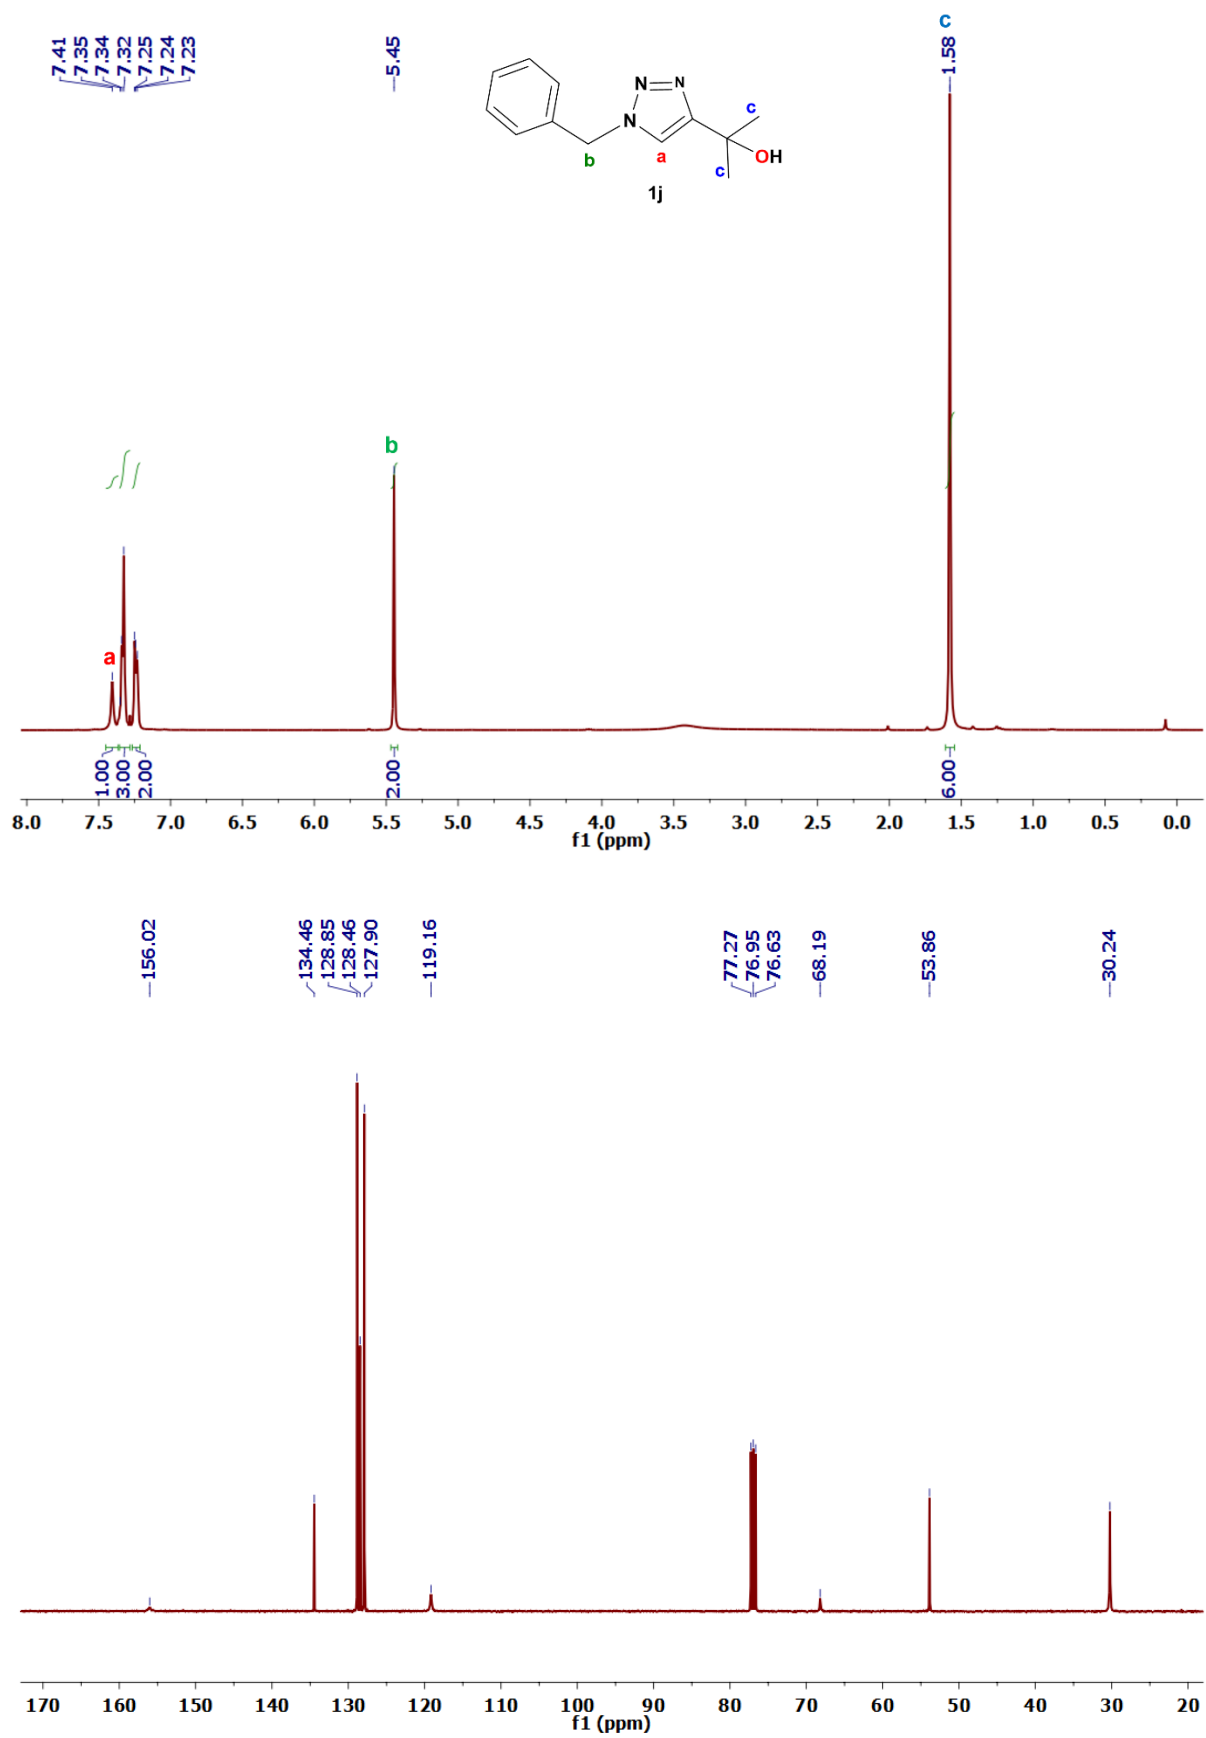

**Figure S17:** <sup>1</sup>H and <sup>13</sup>C NMR spectra of 2-(1-benzyl-1H-1,2,3-triazol-4-yl) propan-2-ol (**1j**)

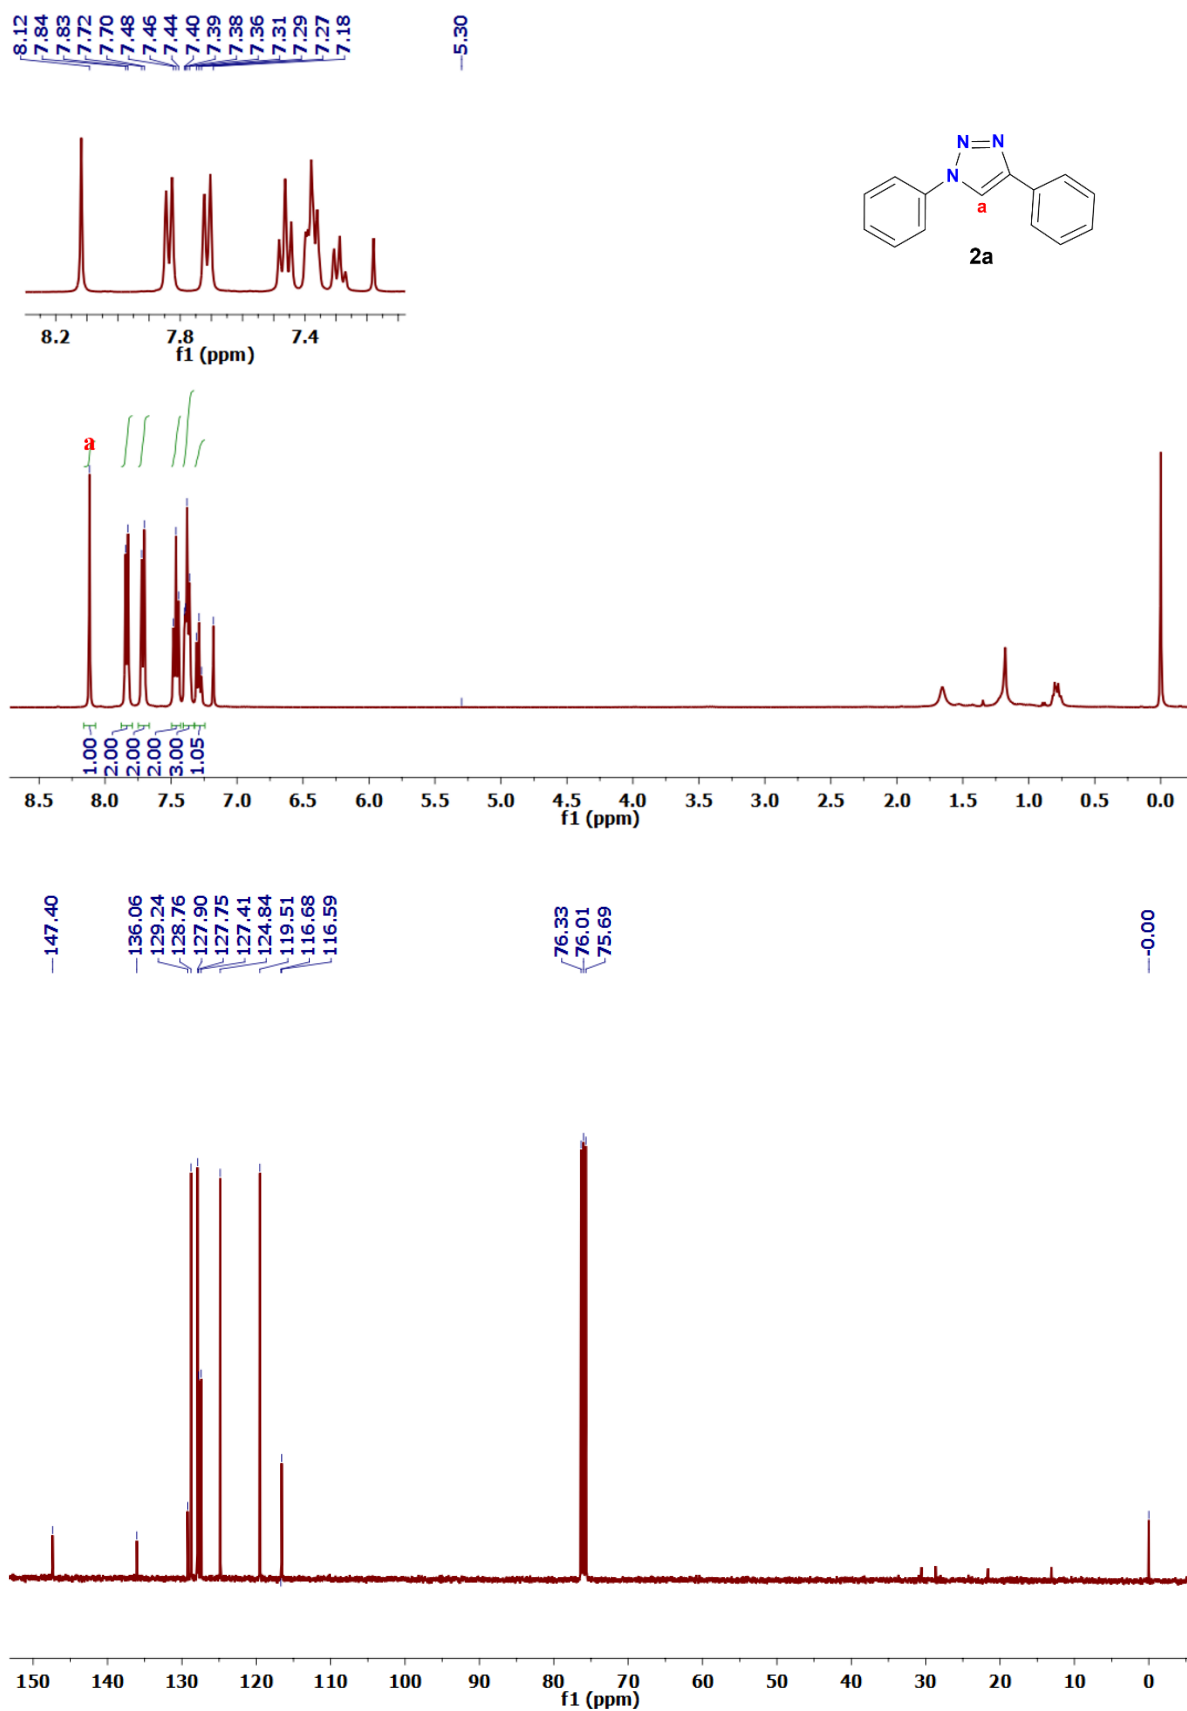

Figure S18: <sup>1</sup>H and <sup>13</sup>C NMR spectra of 1,4-diphenyl-1H-1,2,3-triazole (2a)

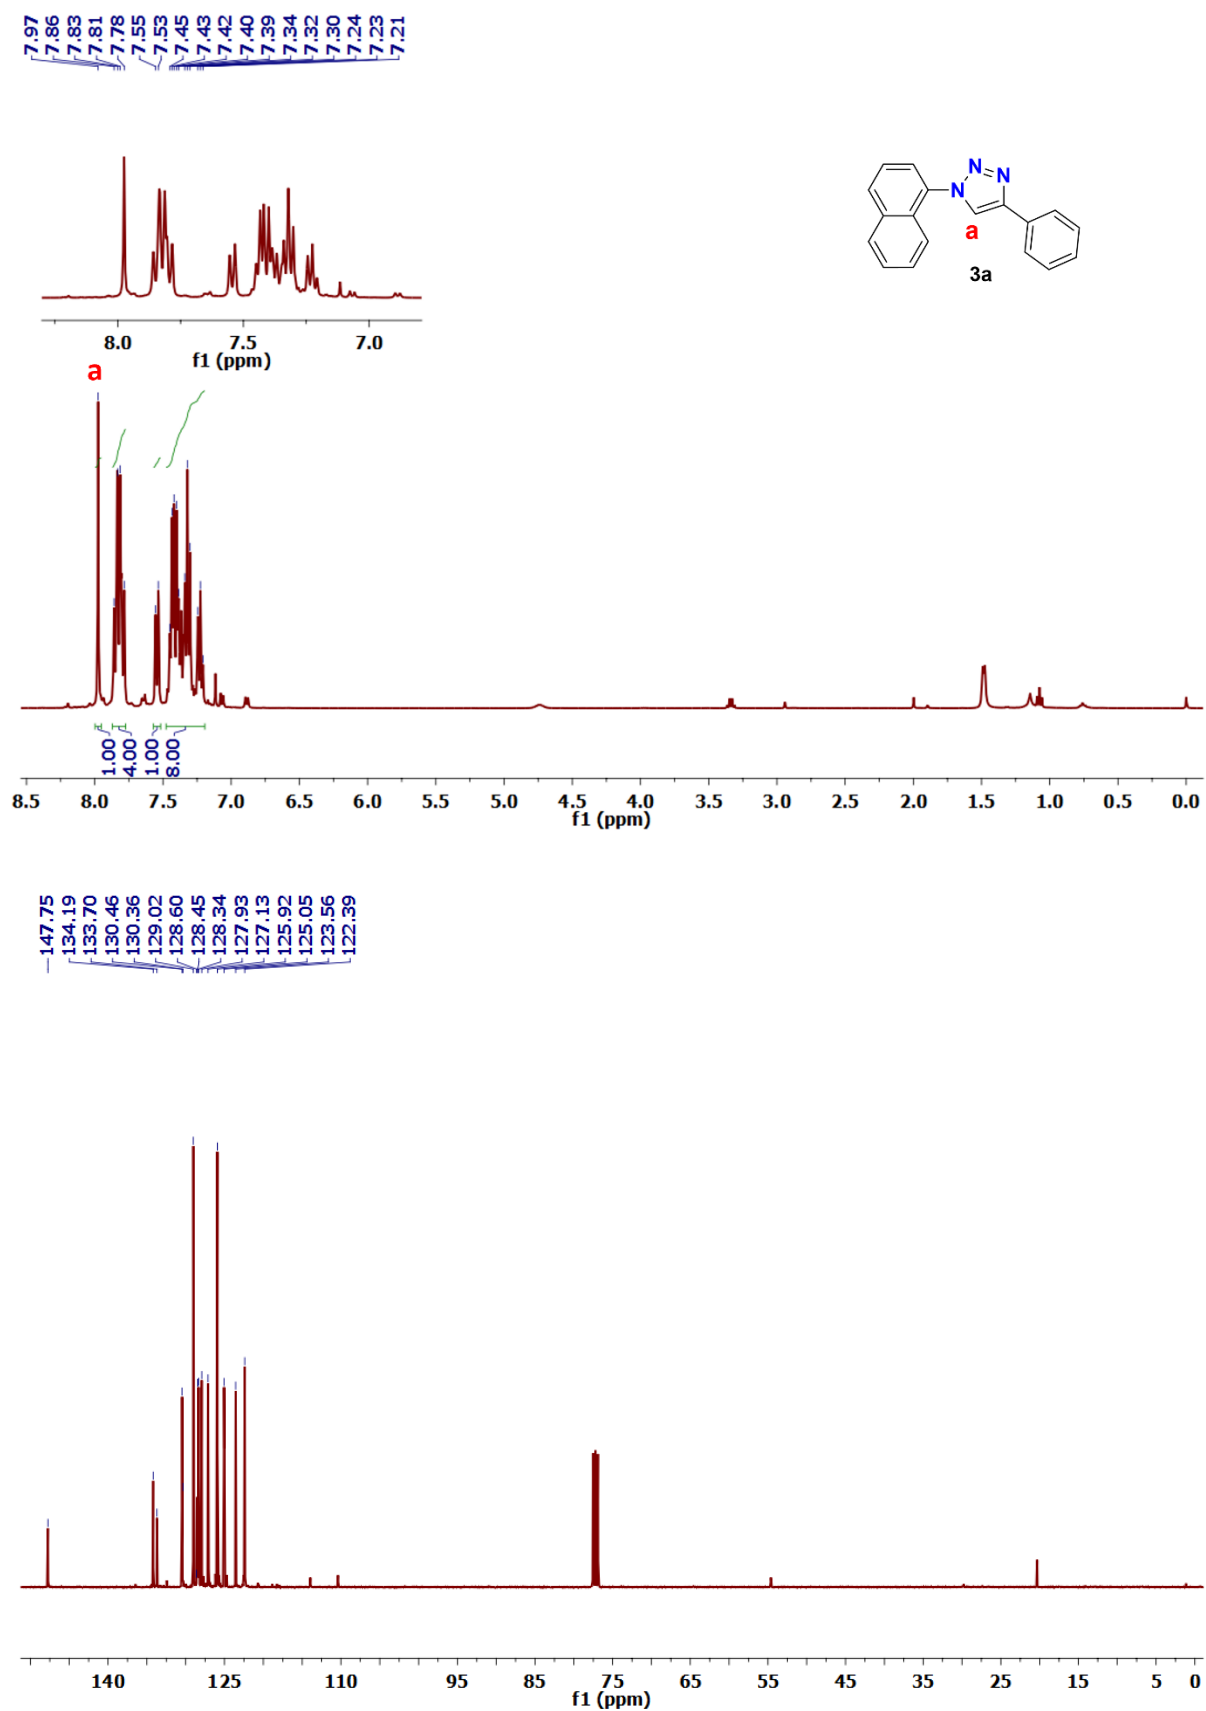

**Figure S19:** <sup>1</sup>H and <sup>13</sup>C NMR spectra of 1-naphthyl-4-phenyl-1H-1,2,3-triazole (**3a**)



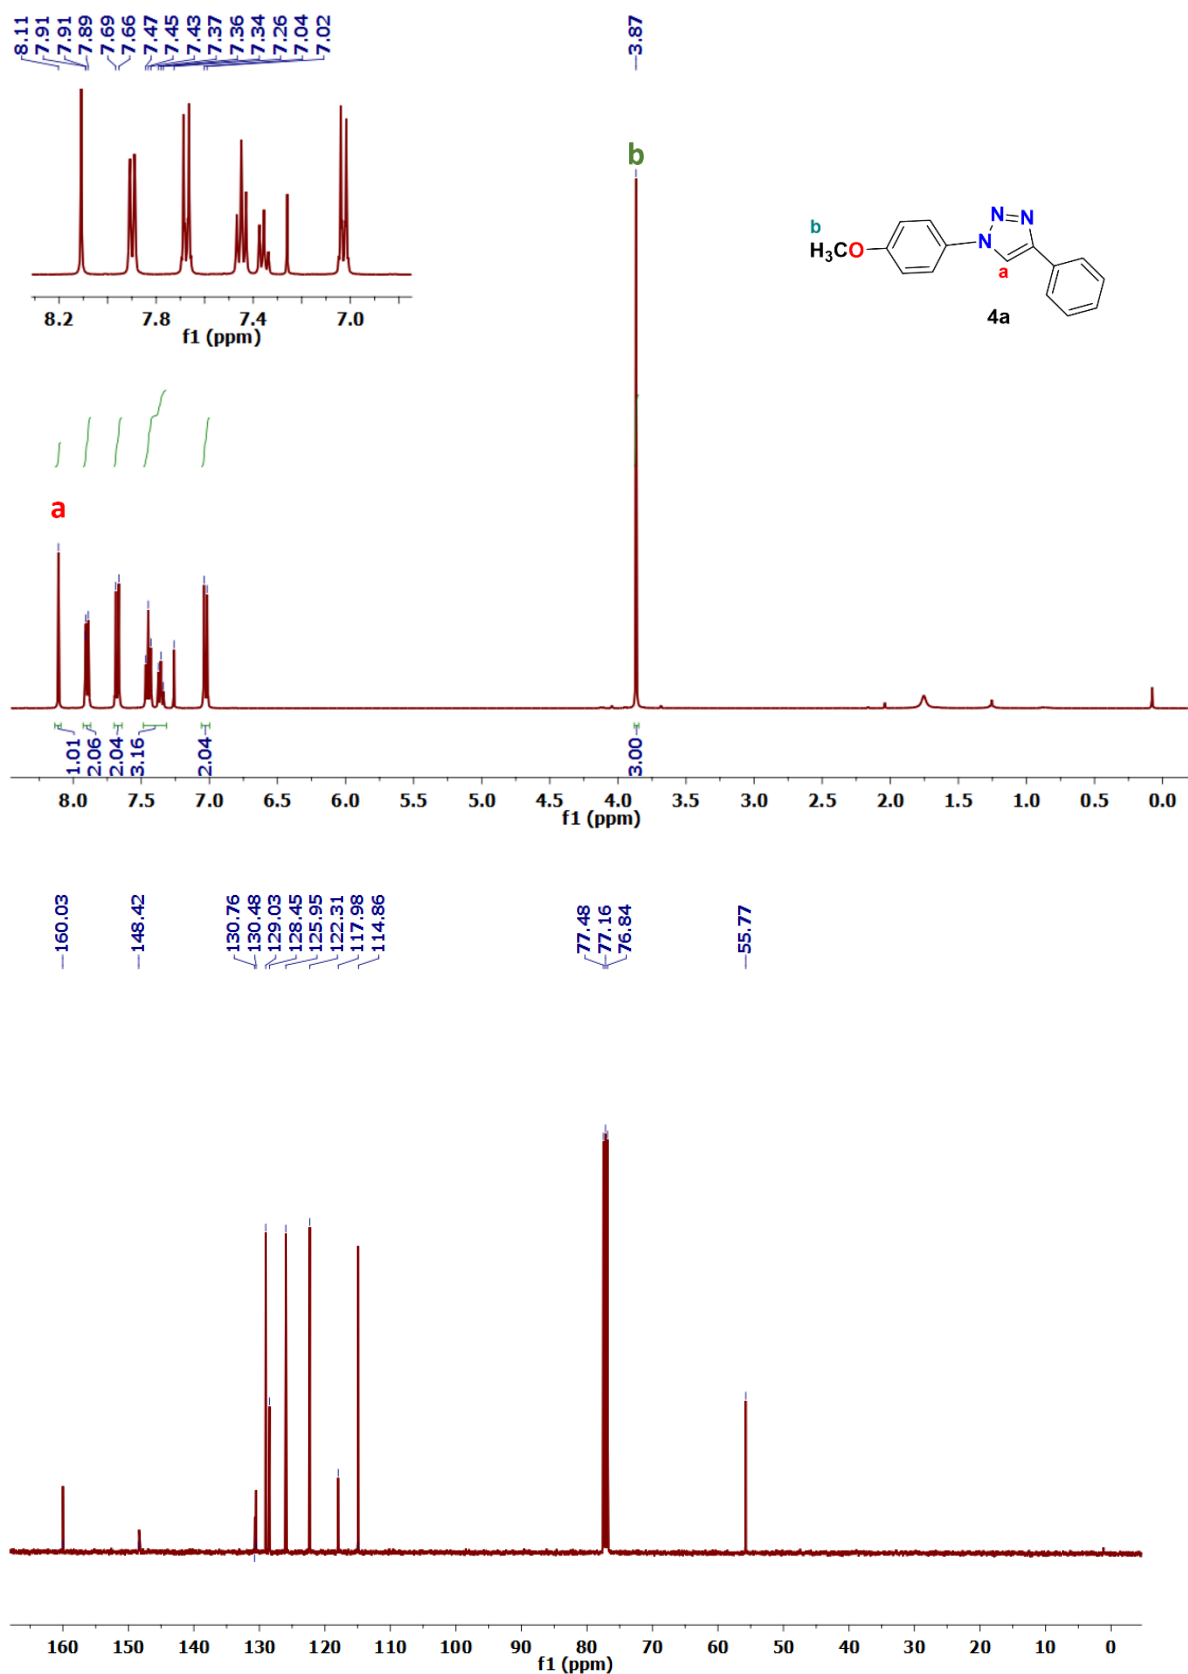

**Figure S20:** <sup>1</sup>H and <sup>13</sup>C NMR spectra of 1-(4-methoxyphenyl)-4-phenyl-1H-1,2,3-triazole (4a)

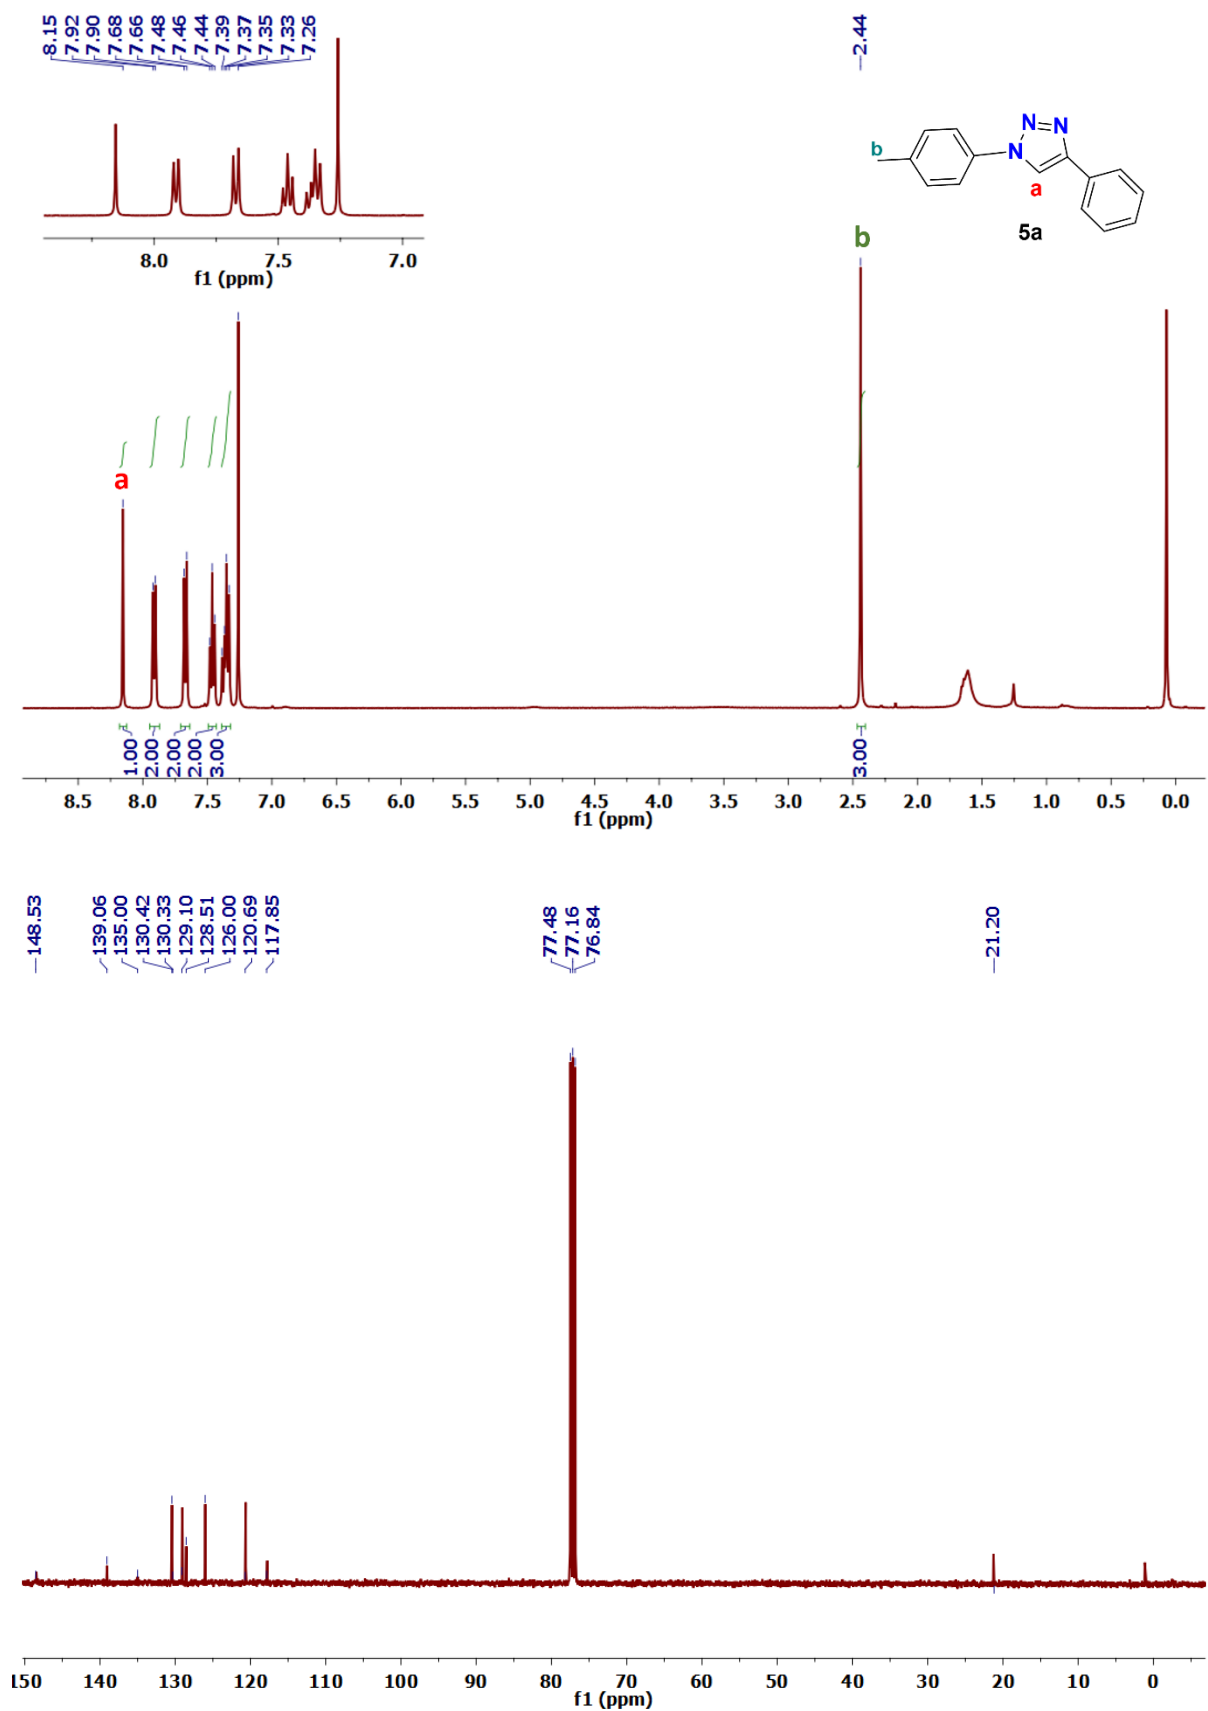

**Figure S21:** <sup>1</sup>H and <sup>13</sup>C NMR spectra of 1-(4-tolyl)-4-phenyl-1H-1,2,3-triazole (**5a**)

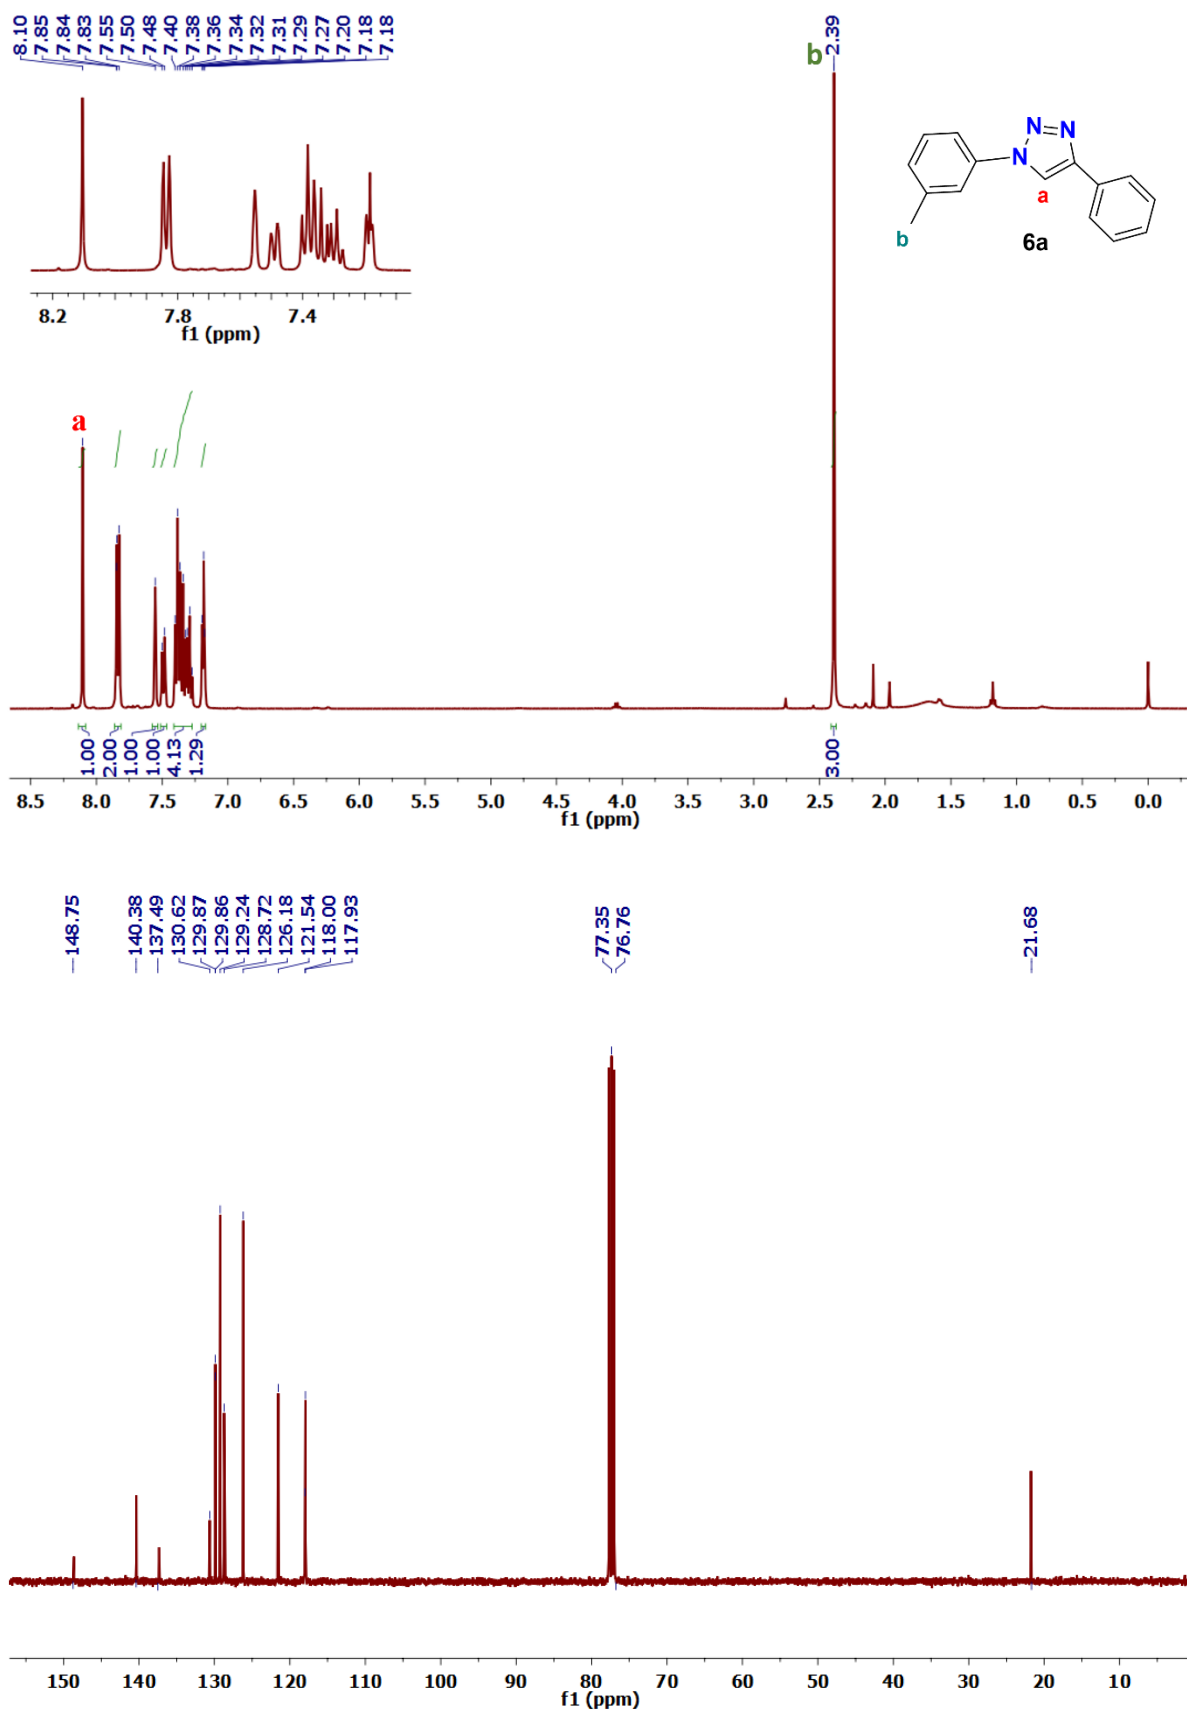

**Figure S22:** <sup>1</sup>H and <sup>13</sup>C NMR spectra of 1-(3-tolyl)-4-phenyl-1H-1,2,3-triazole (**6a**)

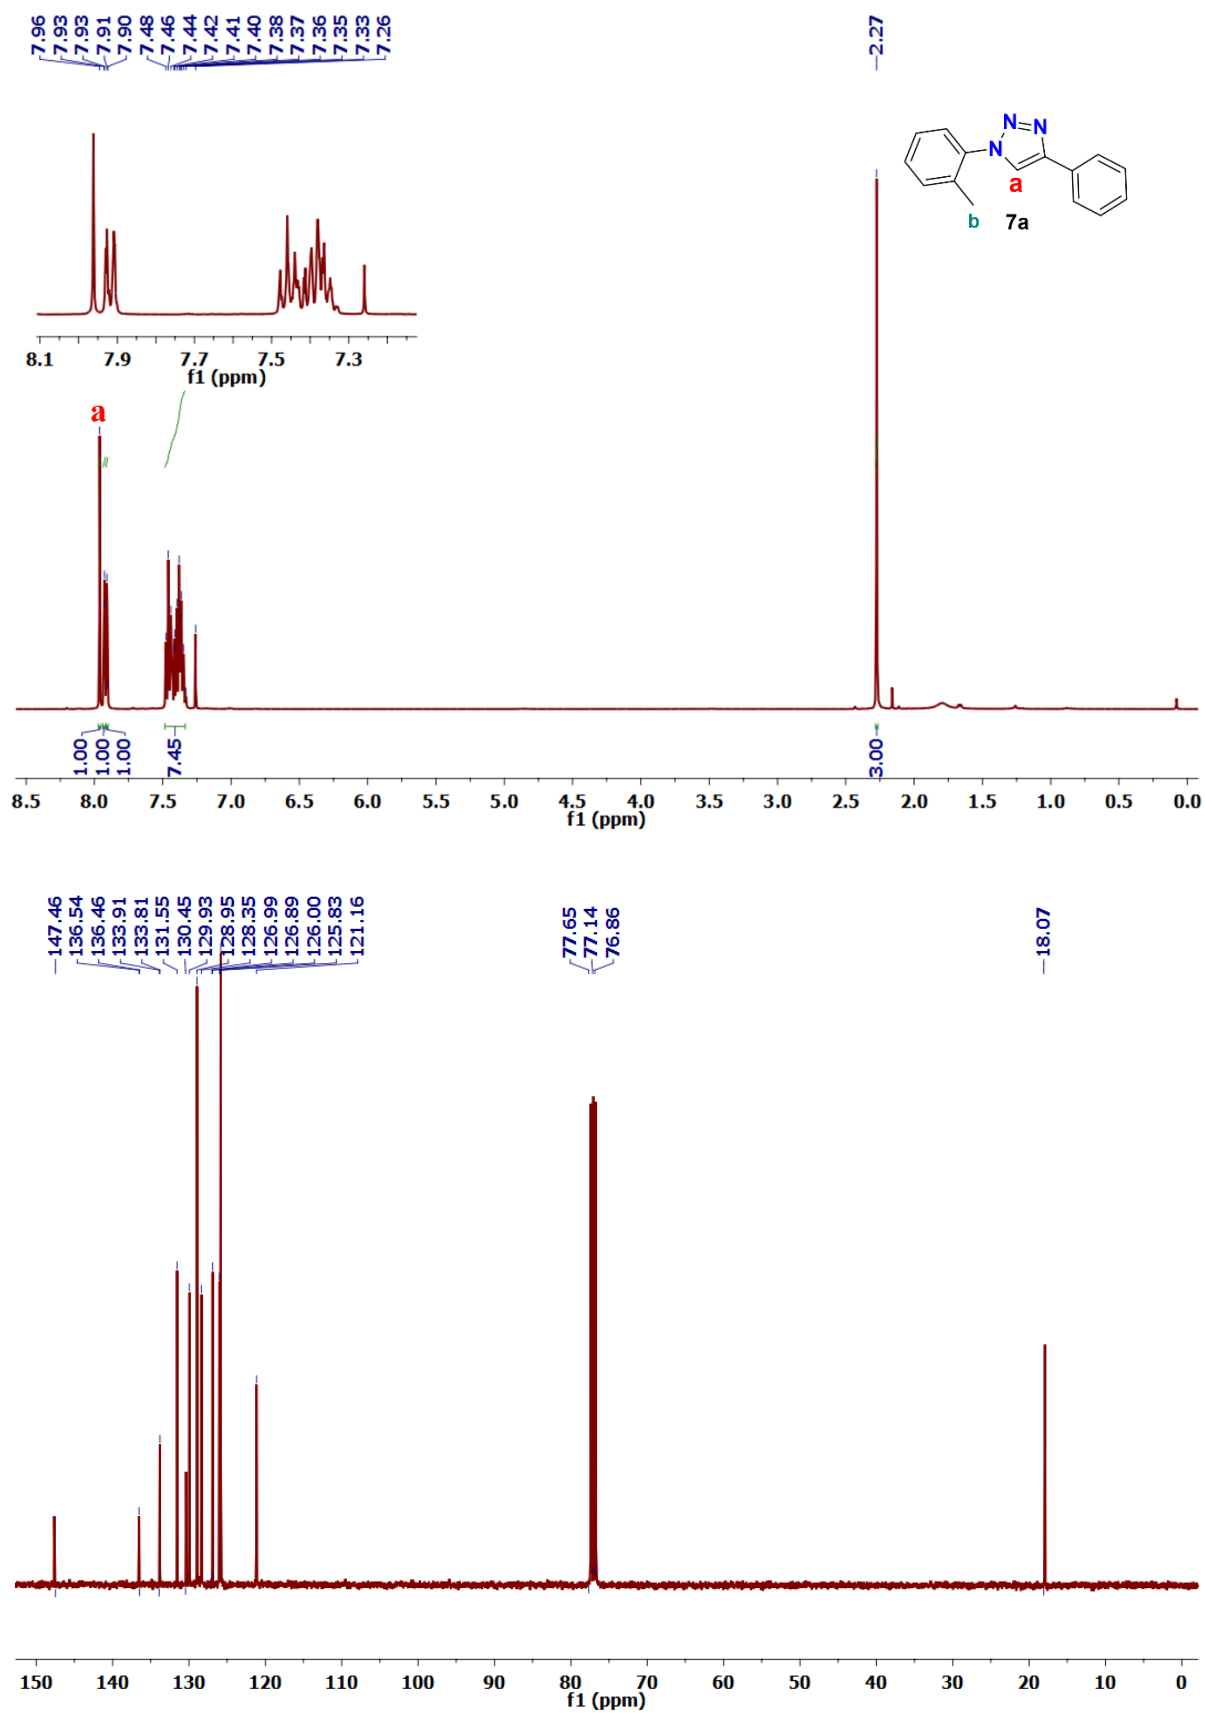

Figure S23: <sup>1</sup>H and <sup>13</sup>C NMR spectra of 1-(2-tolyl)-4-phenyl-1H-1,2,3-triazole (**7a**)

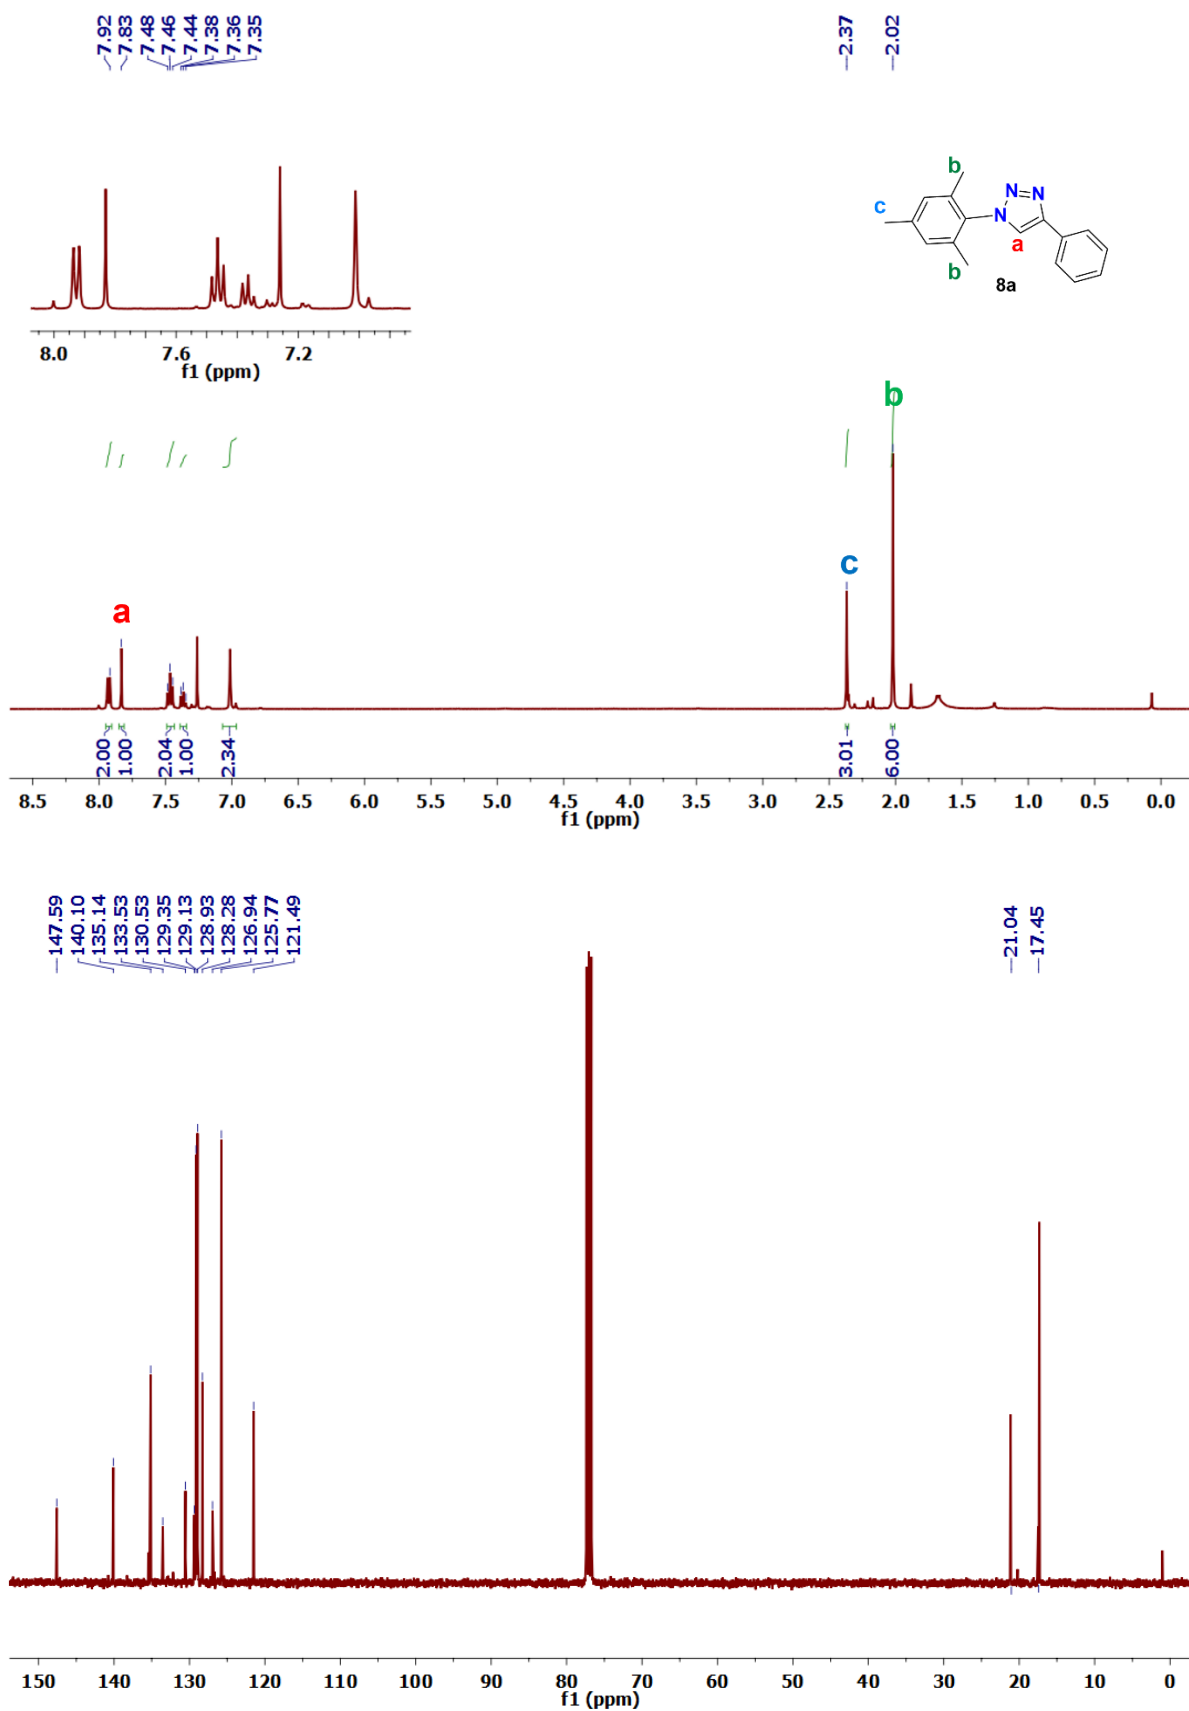

**Figure S24:** <sup>1</sup>H and <sup>13</sup>C NMR spectra of 1-(2,4,6-mesityl)-4-phenyl-1H-1,2,3-triazole (**8a**)

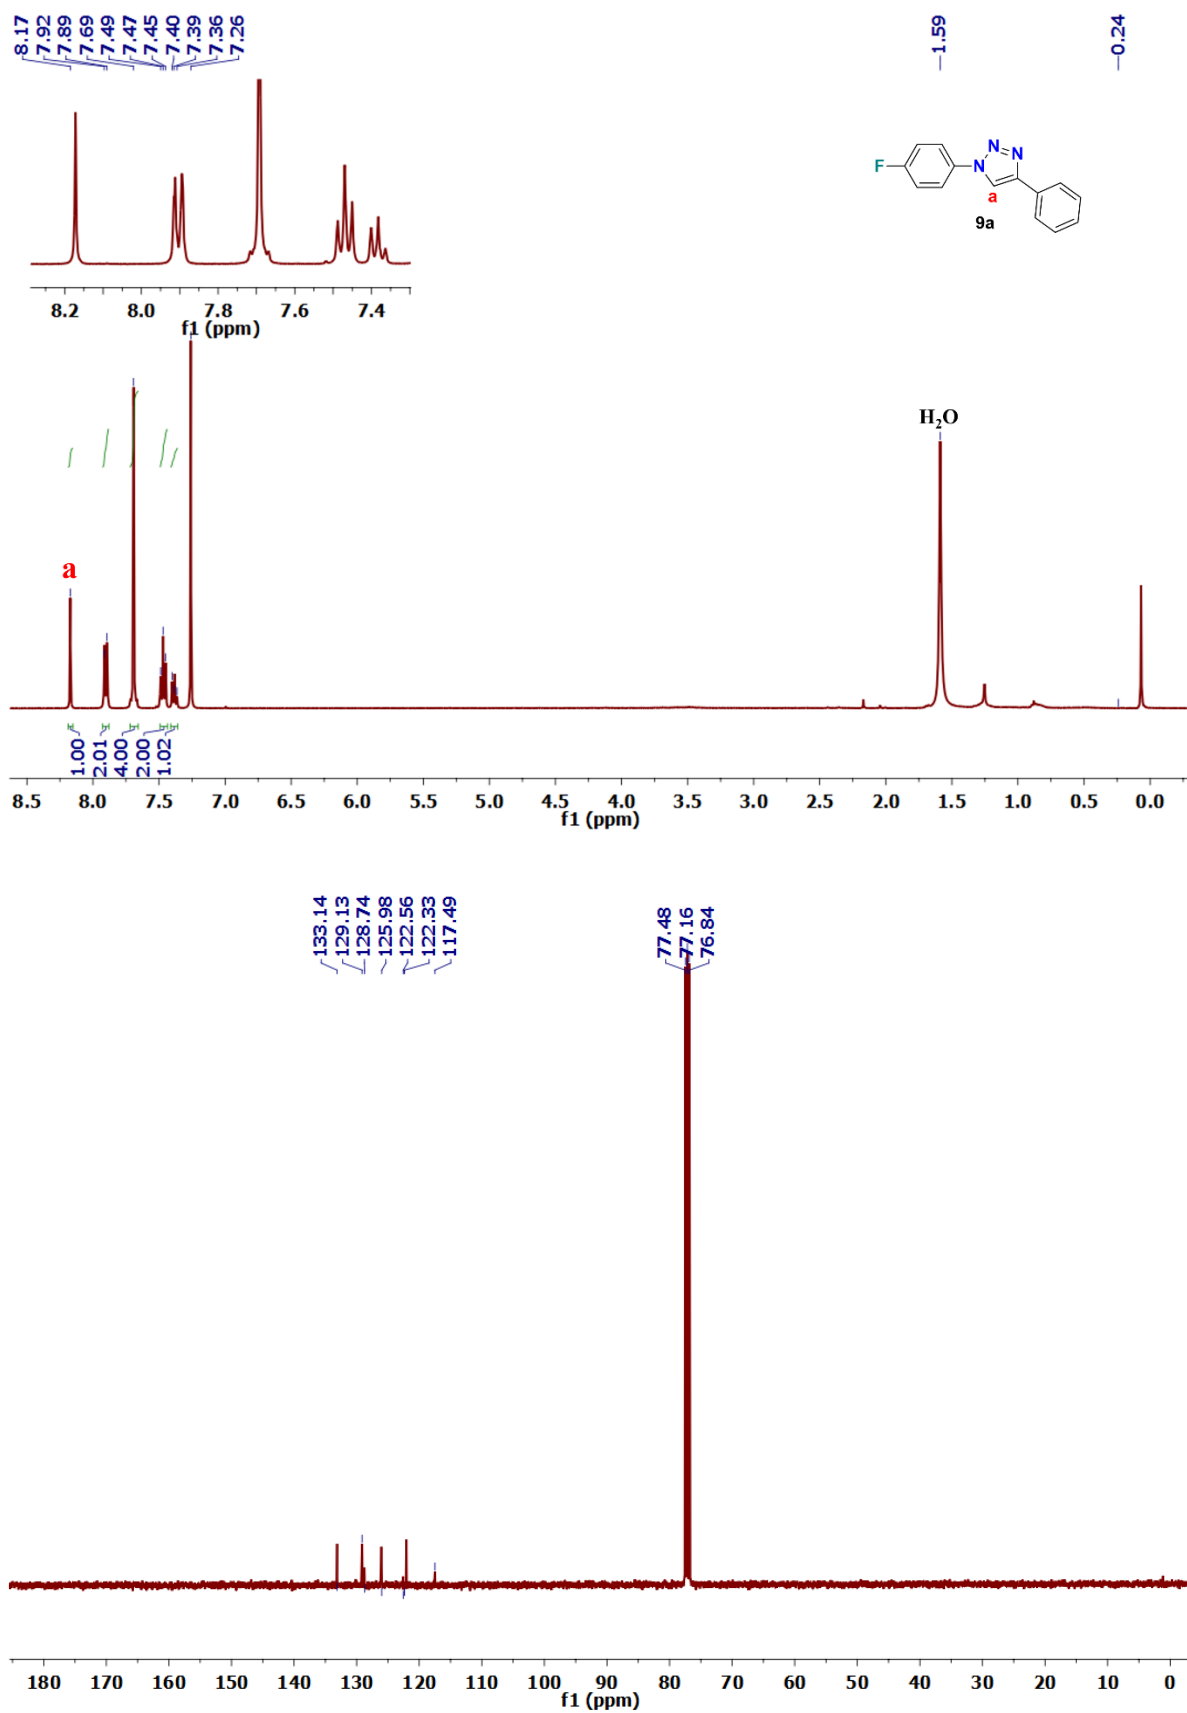

**Figure S25:** <sup>1</sup>H and <sup>13</sup>C NMR spectra of 1-(4-fluorophenyl)-4-phenyl-1H-1,2,3-triazole (**9a**)

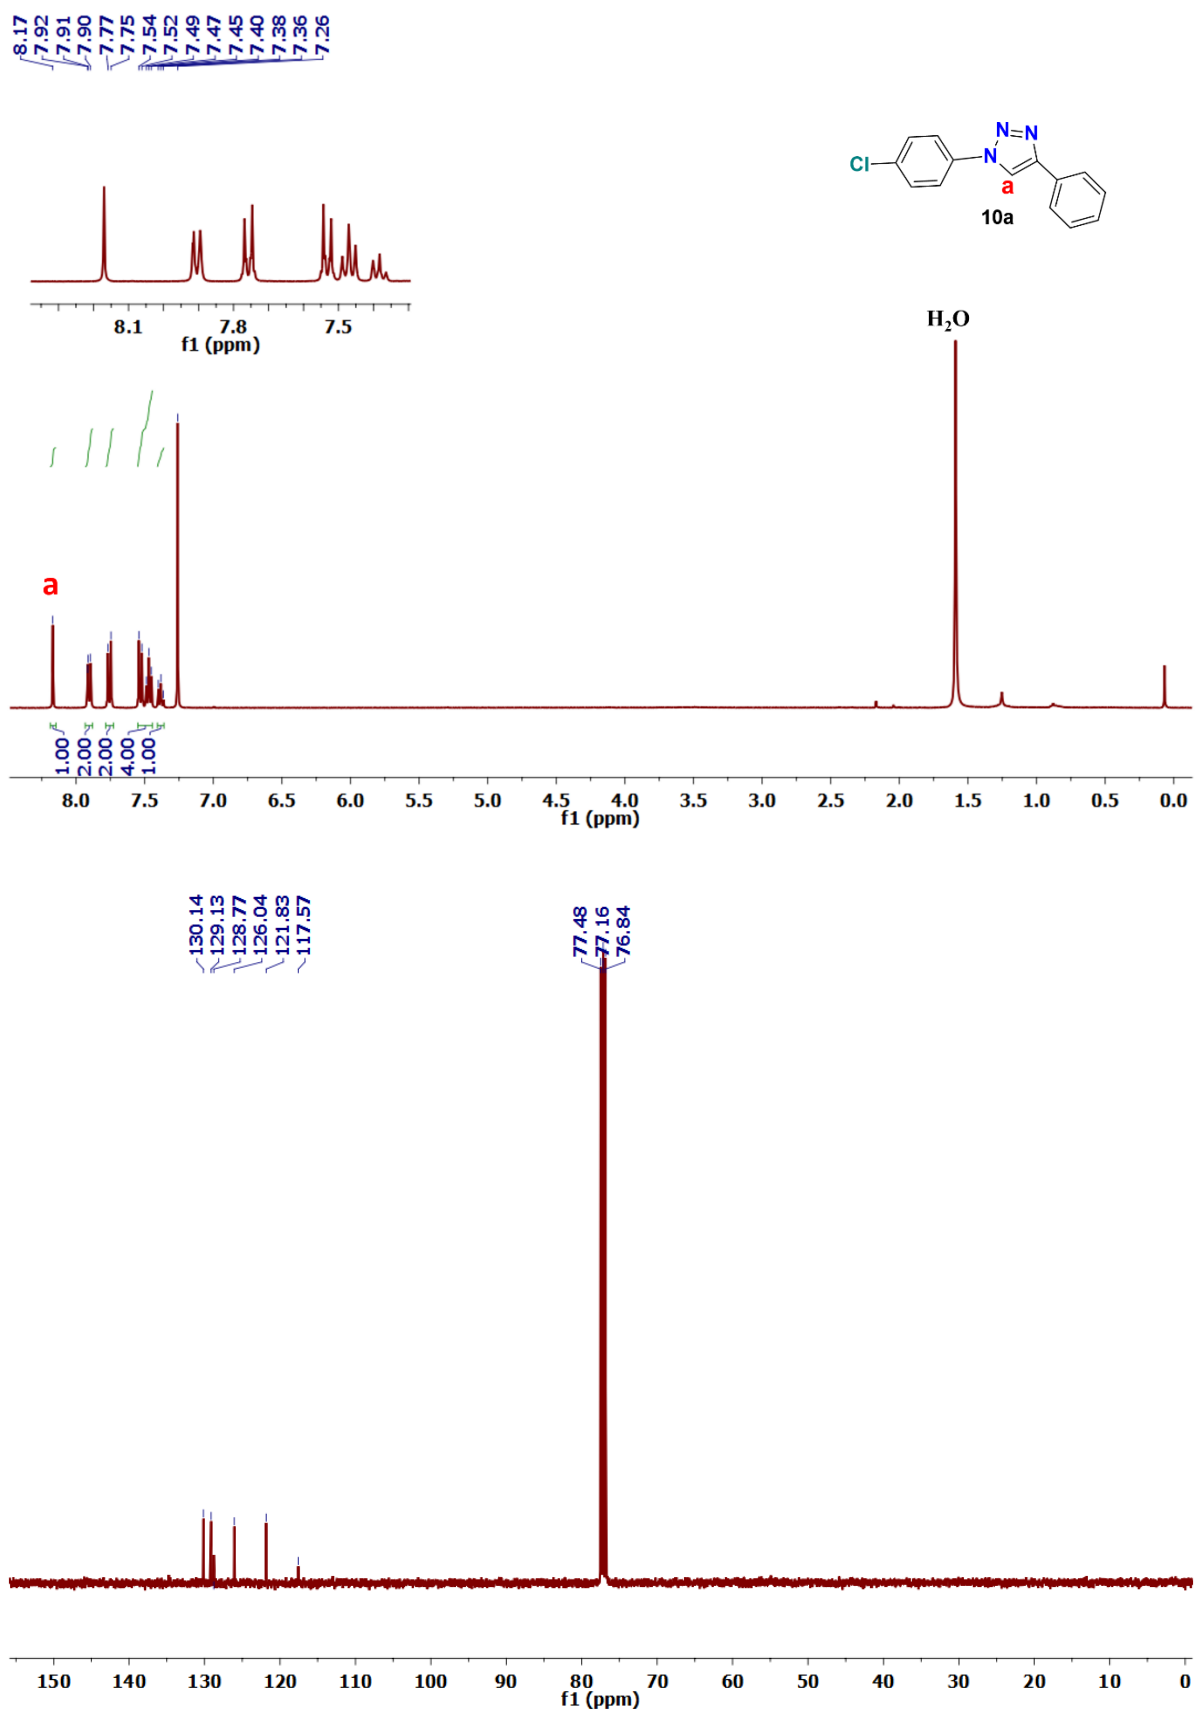

**Figure S26:** <sup>1</sup>H and <sup>13</sup>C NMR spectra of 1-(4-chlorophenyl)-4-phenyl-1H-1,2,3-triazole (10a)

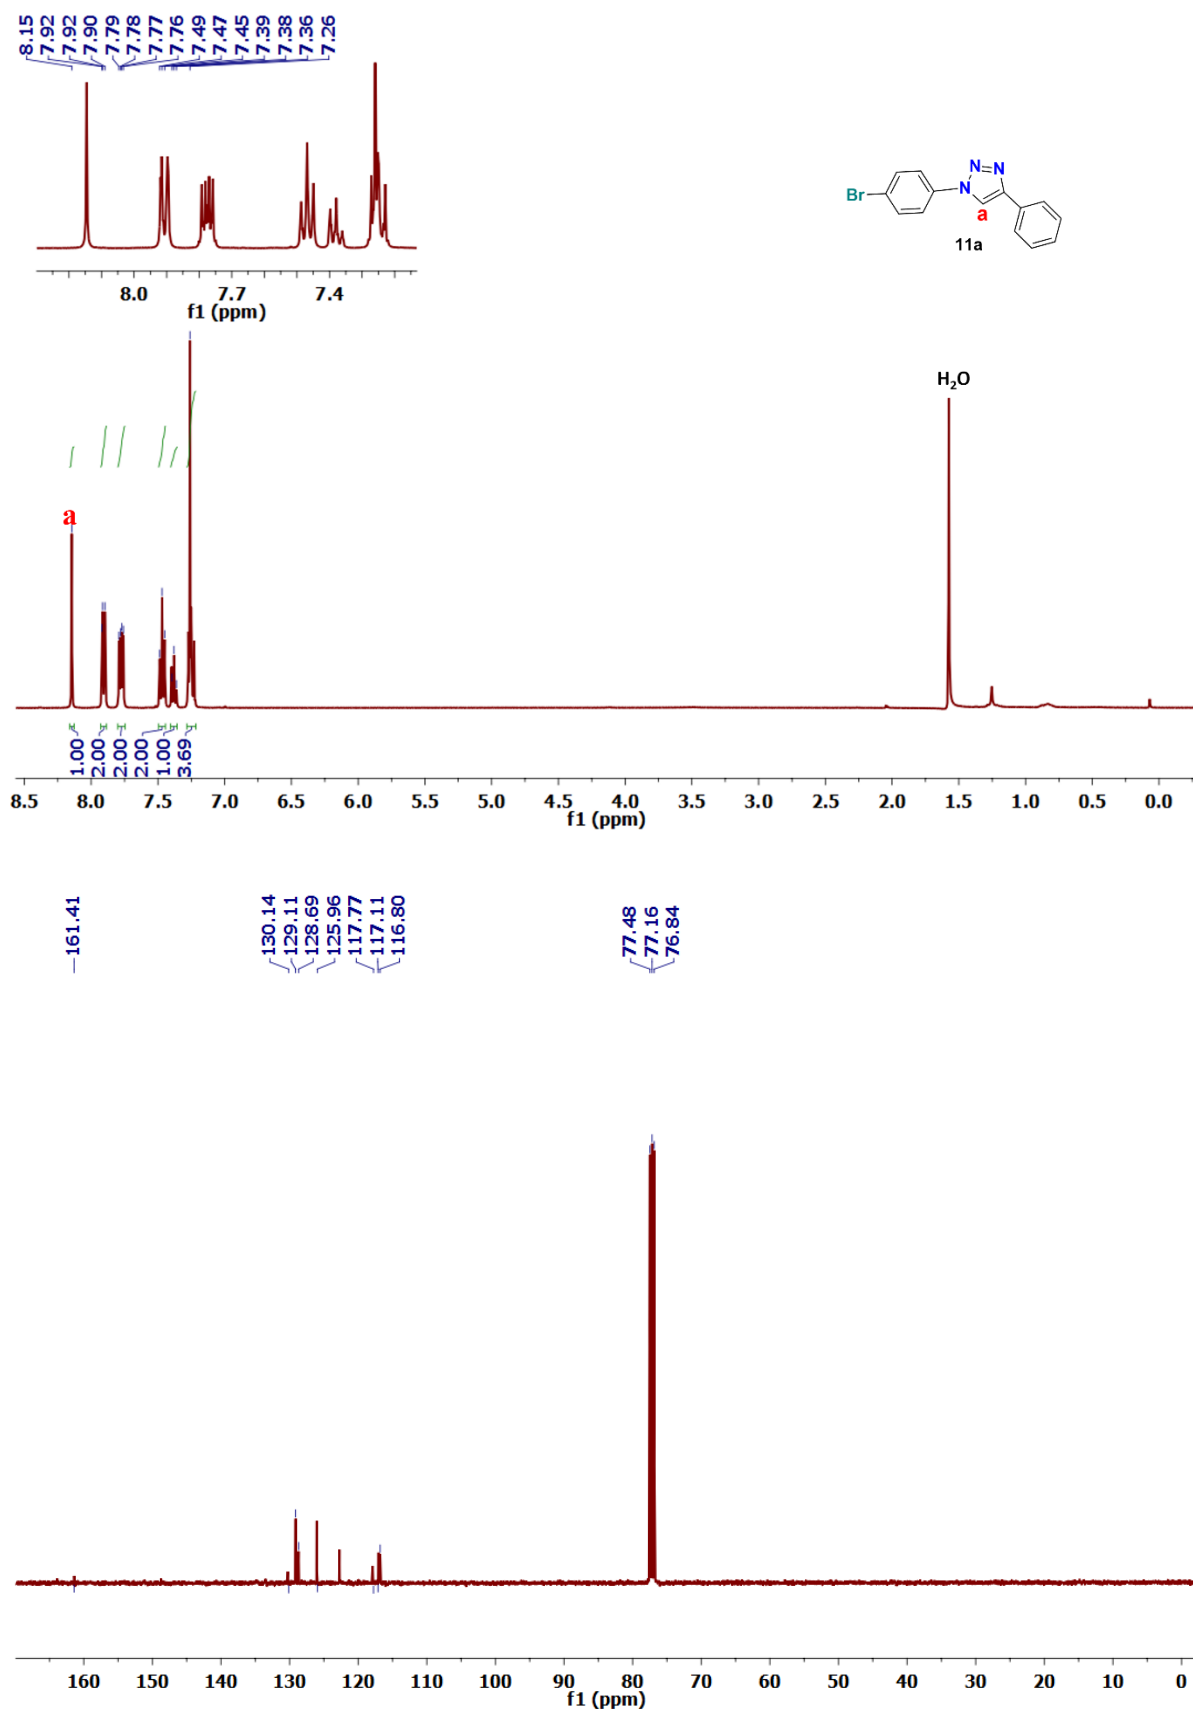

**Figure S27:** <sup>1</sup>H and <sup>13</sup>C NMR spectra of 1-(4-bromophenyl)-4-phenyl-1H-1,2,3-triazole (11a)



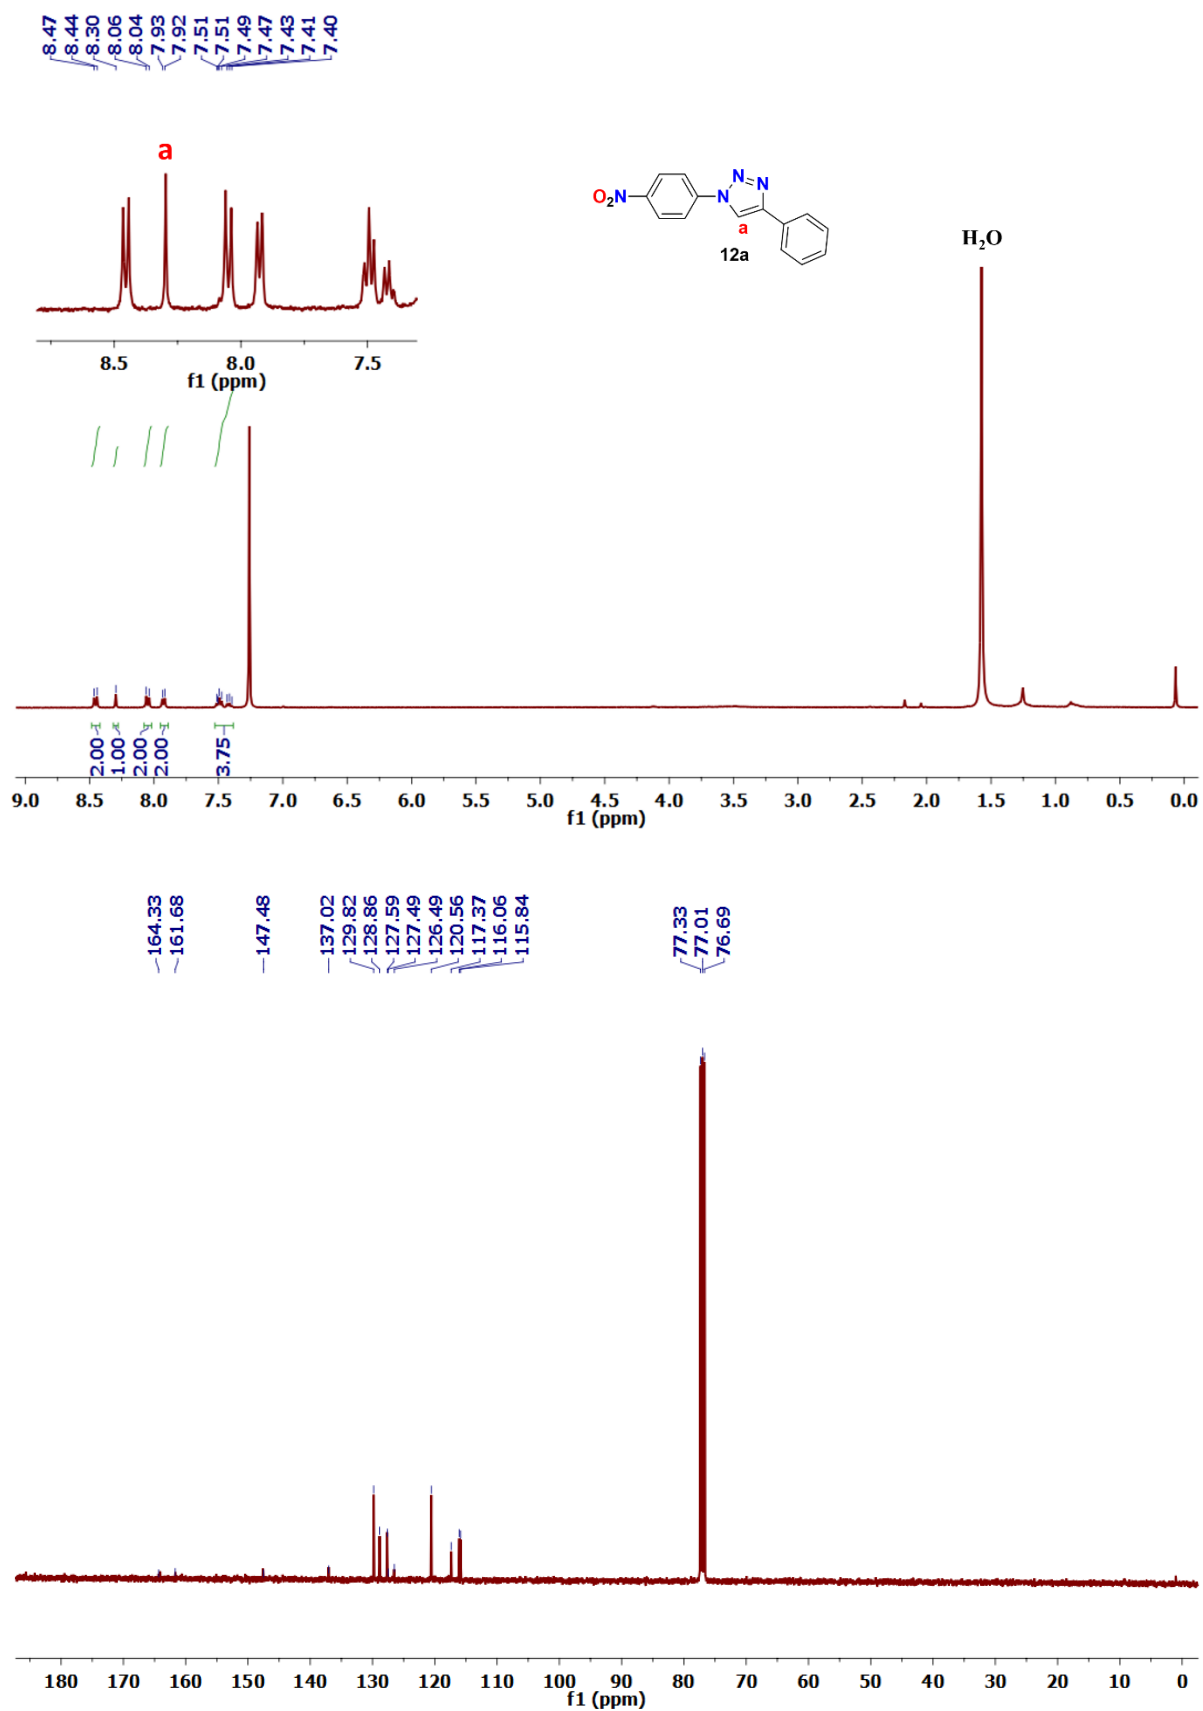

Figure S28: <sup>1</sup>H and <sup>13</sup>C NMR spectra of 1-(4-nitrophenyl)-4-phenyl-1H-1,2,3-triazole (**12a**)

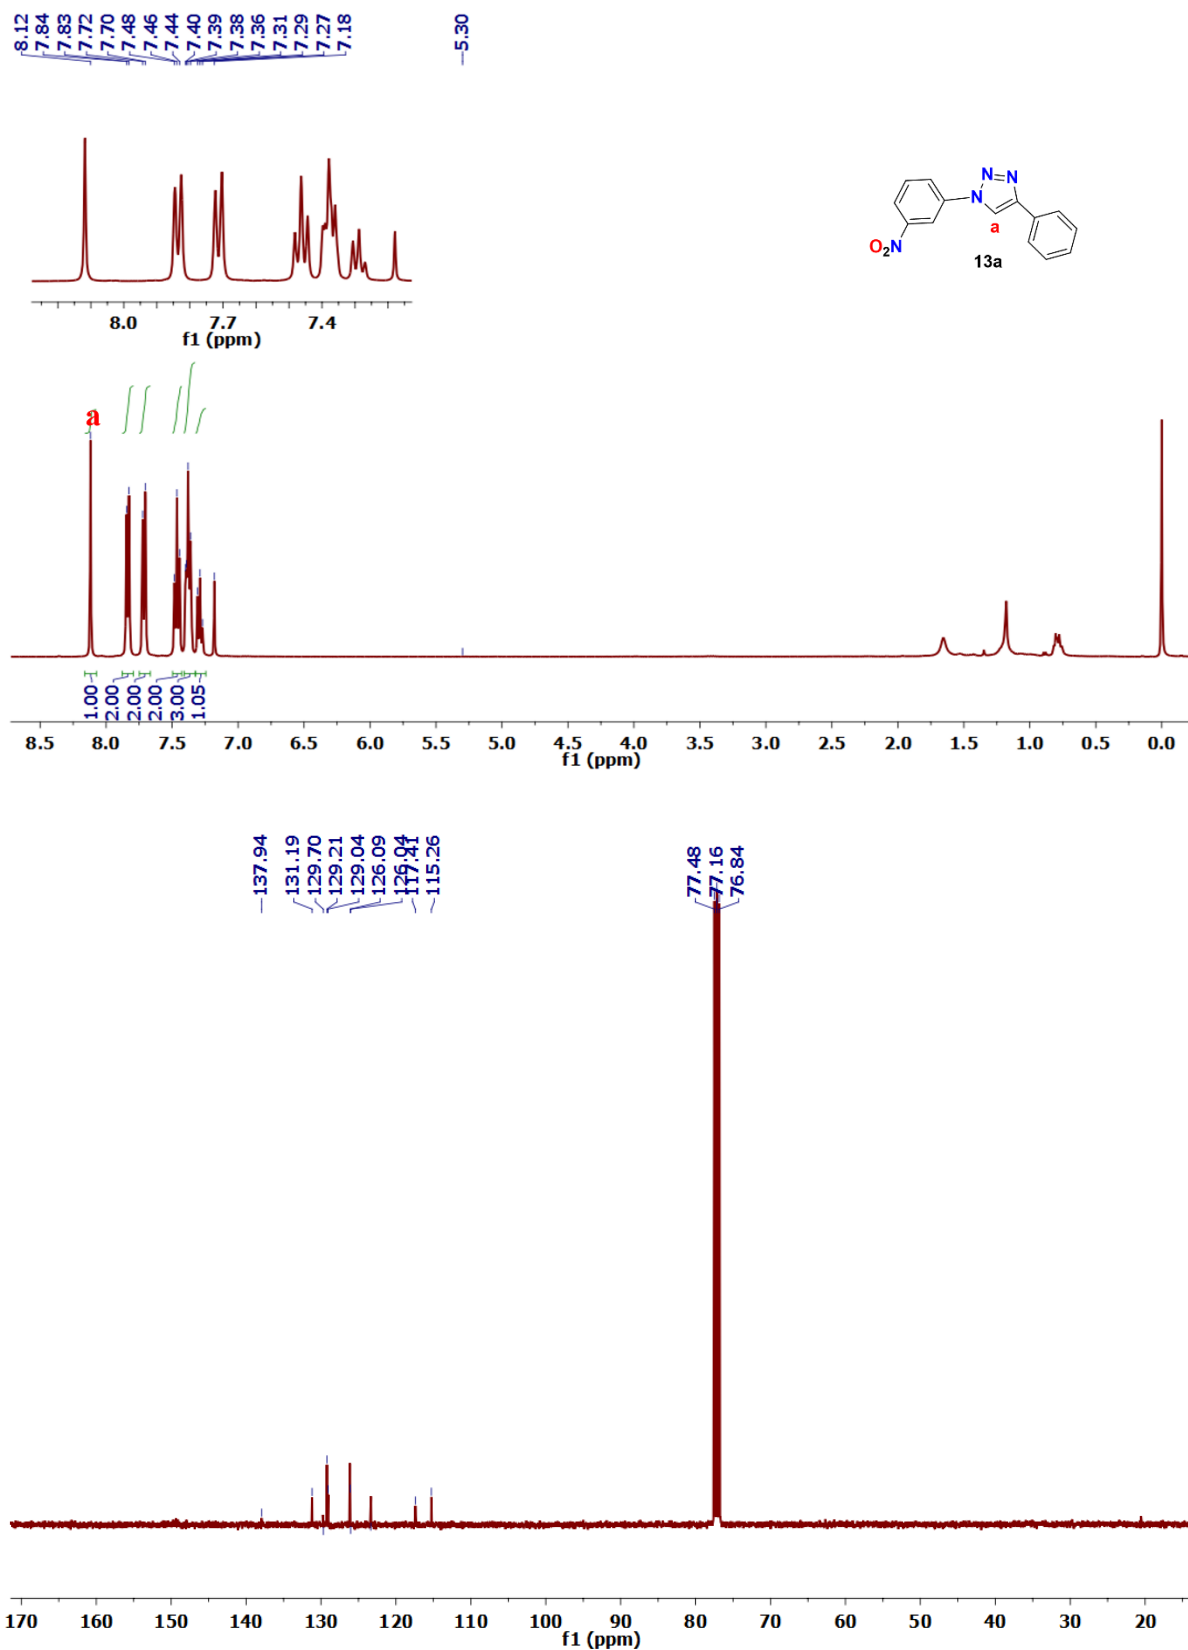

**Figure S29:** <sup>1</sup>H and <sup>13</sup>C NMR spectra of 1-(3-nitrophenyl)-4-phenyl-1H-1,2,3-triazole (**13a**)

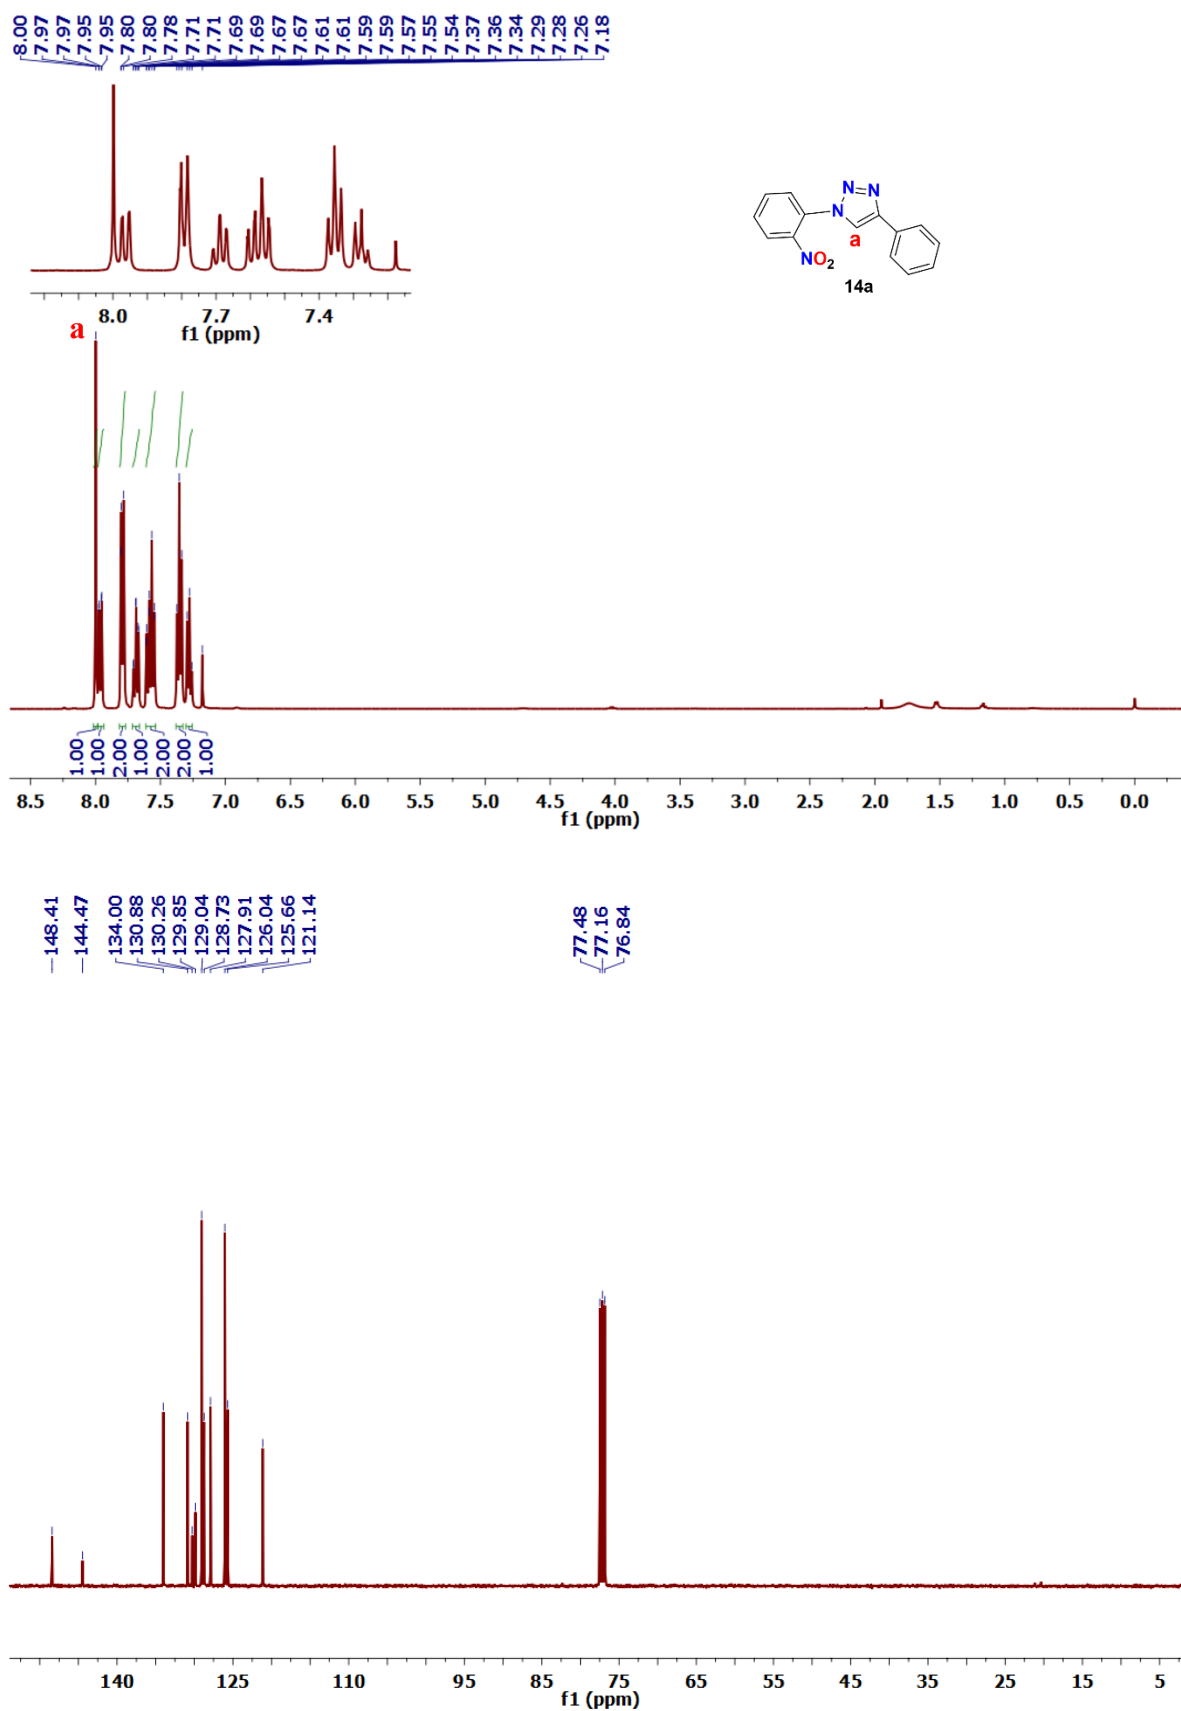

**Figure S30:** <sup>1</sup>H and <sup>13</sup>C NMR spectra of 1-(2-nitrophenyl)-4-phenyl-1H-1,2,3-triazole (**14a**)

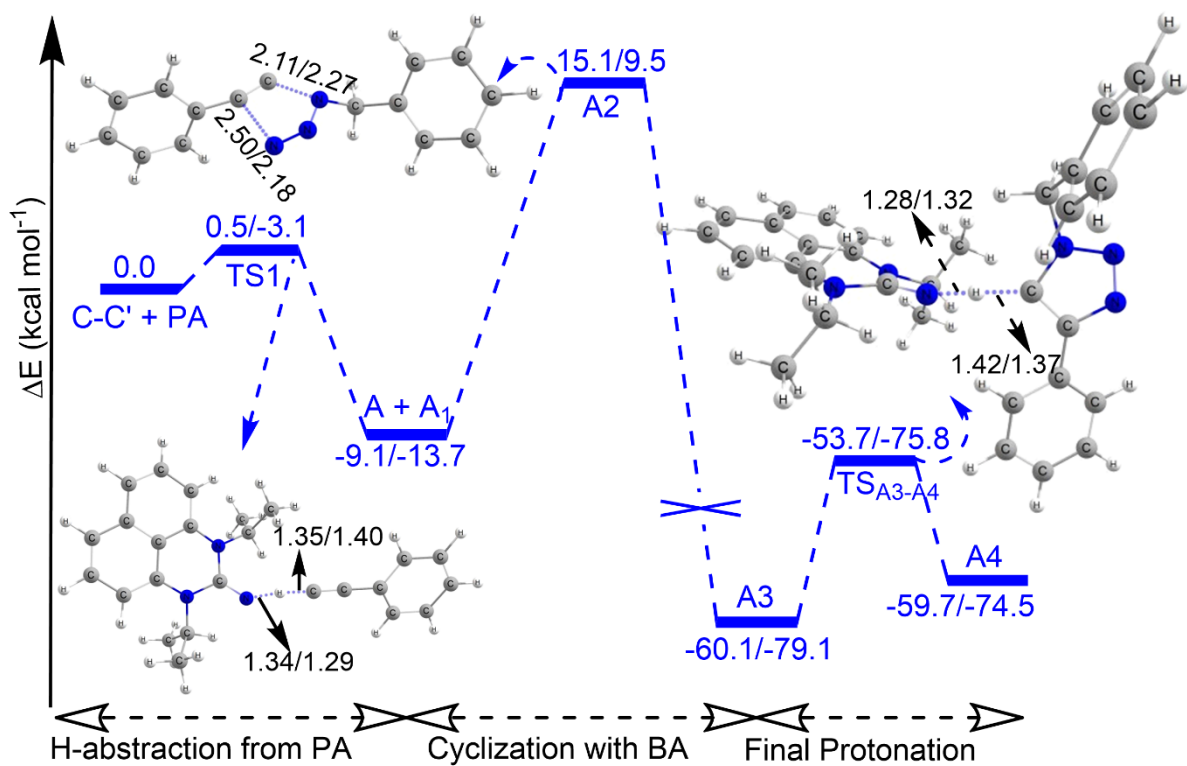

**Figure S31:** The potential energy profile and geometries of the transition states with important geometrical parameters

## 5. Computational Details

The Pka computed at the M062X/6-311++G\*\* level of theory in the presence of water is considered as SMD solvation model.

| Compound           | PKa  |
|--------------------|------|
| Phenyl acetylene   | 20.1 |
| C-C (Pre-catalyst) | 30.4 |

The values from a benchmark study used to determine whether to use this method to calculate phenol's pka are as follows:

| Method                     | PKa  | Expt |
|----------------------------|------|------|
| S                          | 12.6 |      |
| B3LYP/6-31++G** SCRf (SMD) | 10.6 | 9.95 |
| M062X/6-31++G** SCRf (SMD) | 9.6  |      |

The geometries have been optimized in two different density functional theory method (M062X and B3LYP) in combination with pople's split valance triple zeta basis set 6-311+G(d,p)<sup>3</sup>. M06-2X is a meta-GGA DFT functional with remarkable success in kinetic and thermodynamic calculations of the leading group elements.<sup>4</sup> B3LYP is the most popular DFT method consists of Becke's three-parameter hybrid exchange along with the Lee–Yang–Parr correlation.<sup>5-7</sup> Frequency calculations have also been performed to verify the stationary points as minima or transition states and to calculate free energy correction. Intrinsic reaction coordinate (IRC) analyses<sup>8</sup> were performed to confirm whether obtained transition states connect the exact minima. The self-consistent reaction field (SCRf), with solvation model density (SMD)<sup>9</sup>, and polarizable continuum model (PCM)<sup>10</sup> were used to consider the influence of solvent dimethylsulphoxide on the reaction. All the computations were carried out using the Gaussian 16 program<sup>11</sup>, and for the visualization and result analysis, Chemcraft software was used<sup>12</sup>.

Thermochemistry and optimized coordinates of all the species computed at B3LYP/6-311+G\*\* and M062X/6-311+G\*\* level of theory.

**B3LYP data:**

**C-C**

Zero-point correction= 0.349425 (Hartree/Particle)

Thermal correction to Energy = 0.367838

Thermal correction to Enthalpy = 0.368783

Thermal correction to Gibbs Free Energy = 0.304098

Sum of electronic and zero-point Energies = -824.597336

Sum of electronic and thermal Energies = -824.578923

Sum of electronic and thermal Enthalpies = -824.577979

Sum of electronic and thermal Free Energies= -824.642664

|   |              |              |              |
|---|--------------|--------------|--------------|
| C | -2.313318000 | 2.580296000  | -0.605243000 |
| C | -1.175972000 | 3.289766000  | -0.301671000 |
| C | 0.020971000  | 2.597987000  | 0.018225000  |
| C | 0.010230000  | 1.170540000  | 0.019031000  |
| C | -1.204722000 | 0.458013000  | -0.192633000 |
| C | -2.340652000 | 1.171449000  | -0.550065000 |
| H | 1.244669000  | 4.355233000  | 0.339985000  |
| H | -3.223580000 | 3.104103000  | -0.875628000 |
| H | -1.175314000 | 4.373778000  | -0.309334000 |
| C | 1.230126000  | 3.271243000  | 0.334026000  |
| C | 1.216067000  | 0.447665000  | 0.228636000  |
| H | -3.267945000 | 0.668024000  | -0.766555000 |
| C | 2.364782000  | 1.138694000  | 0.582700000  |
| C | 2.359715000  | 2.548287000  | 0.634659000  |
| H | 3.282089000  | 0.616276000  | 0.801738000  |
| H | 3.277418000  | 3.060535000  | 0.901697000  |
| C | -0.013282000 | -1.662314000 | 0.094687000  |
| N | -1.203307000 | -0.925772000 | 0.045277000  |
| N | 1.184951000  | -0.941348000 | 0.003137000  |
| C | 2.403656000  | -1.692453000 | -0.427673000 |
| H | 2.002488000  | -2.592498000 | -0.891833000 |
| C | -2.462926000 | -1.680653000 | 0.328048000  |
| H | -2.091287000 | -2.618834000 | 0.728597000  |
| C | 3.297541000  | -2.140202000 | 0.738510000  |
| H | 4.045068000  | -2.847233000 | 0.368983000  |
| H | 3.830255000  | -1.309321000 | 1.203501000  |
| H | 2.714388000  | -2.640651000 | 1.515158000  |
| C | 3.177818000  | -0.985896000 | -1.549170000 |
| H | 3.888022000  | -1.701471000 | -1.970899000 |
| H | 2.500552000  | -0.673276000 | -2.347261000 |
| H | 3.742384000  | -0.116945000 | -1.214673000 |
| C | -3.243080000 | -2.039767000 | -0.943752000 |
| H | -4.040637000 | -2.742661000 | -0.686961000 |
| H | -3.706241000 | -1.180137000 | -1.430820000 |
| H | -2.584760000 | -2.527549000 | -1.666081000 |

|   |              |              |             |
|---|--------------|--------------|-------------|
| C | -3.316138000 | -1.044003000 | 1.432967000 |
| H | -2.701119000 | -0.810269000 | 2.305730000 |
| H | -3.839908000 | -0.137743000 | 1.130892000 |
| H | -4.069726000 | -1.773596000 | 1.741258000 |
| N | -0.084327000 | -2.948623000 | 0.200178000 |
| H | 0.827069000  | -3.367462000 | 0.334675000 |

### C-C'

Zero-point correction= 0.334031 (Hartree/Particle)

Thermal correction to Energy = 0.352778

Thermal correction to Enthalpy = 0.353722

Thermal correction to Gibbs Free Energy = 0.287914

Sum of electronic and zero-point Energies = -824.087086

Sum of electronic and thermal Energies = -824.068339

Sum of electronic and thermal Enthalpies = -824.067395

Sum of electronic and thermal Free Energies = -824.133204

|   |              |              |              |
|---|--------------|--------------|--------------|
| C | 2.415685000  | 2.595805000  | -0.027062000 |
| C | 1.234740000  | 3.300419000  | -0.068140000 |
| C | 0.000001000  | 2.599613000  | -0.064115000 |
| C | 0.000000000  | 1.166060000  | -0.033795000 |
| C | 1.244070000  | 0.448489000  | -0.002797000 |
| C | 2.433504000  | 1.192609000  | 0.007350000  |
| H | -1.227303000 | 4.384568000  | -0.092908000 |
| H | 3.363601000  | 3.125328000  | -0.021921000 |
| H | 1.227308000  | 4.384566000  | -0.092912000 |
| C | -1.234736000 | 3.300420000  | -0.068138000 |
| C | -1.244070000 | 0.448491000  | -0.002795000 |
| H | 3.388948000  | 0.698771000  | 0.037038000  |
| C | -2.433503000 | 1.192613000  | 0.007353000  |
| C | -2.415682000 | 2.595808000  | -0.027058000 |
| H | -3.388948000 | 0.698777000  | 0.037044000  |
| H | -3.363598000 | 3.125333000  | -0.021914000 |
| C | -0.000001000 | -1.720234000 | -0.298660000 |
| N | 1.215538000  | -0.931133000 | 0.019885000  |
| N | -1.215540000 | -0.931131000 | 0.019886000  |
| C | -2.437293000 | -1.758707000 | 0.118654000  |
| H | -2.013671000 | -2.762878000 | 0.102008000  |
| C | 2.437291000  | -1.758708000 | 0.118657000  |
| H | 2.013669000  | -2.762879000 | 0.102020000  |
| C | -3.366491000 | -1.698785000 | -1.107427000 |
| H | -4.086343000 | -2.521390000 | -1.048220000 |
| H | -3.936055000 | -0.772423000 | -1.194616000 |
| H | -2.787916000 | -1.827911000 | -2.025340000 |
| C | -3.171136000 | -1.595164000 | 1.458255000  |
| H | -3.940134000 | -2.369476000 | 1.540506000  |
| H | -2.473736000 | -1.727449000 | 2.290070000  |
| H | -3.663363000 | -0.629130000 | 1.582901000  |
| C | 3.171139000  | -1.595157000 | 1.458254000  |
| H | 3.940136000  | -2.369471000 | 1.540509000  |
| H | 3.663369000  | -0.629125000 | 1.582893000  |

|   |              |              |              |
|---|--------------|--------------|--------------|
| H | 2.473741000  | -1.727435000 | 2.290073000  |
| C | 3.366487000  | -1.698795000 | -1.107425000 |
| H | 2.787910000  | -1.827918000 | -2.025338000 |
| H | 3.936058000  | -0.772436000 | -1.194617000 |
| H | 4.086332000  | -2.521405000 | -1.048217000 |
| N | -0.000004000 | -2.892691000 | -0.683447000 |

### BA (benzyl azide)

Zero-point correction = 0.131665 (Hartree/Particle)

Thermal correction to Energy = 0.140118

Thermal correction to Enthalpy = 0.141062

Thermal correction to Gibbs Free Energy = 0.096436

Sum of electronic and zero-point Energies = -435.135950

Sum of electronic and thermal Energies = -435.127497

Sum of electronic and thermal Enthalpies = -435.126553

Sum of electronic and thermal Free Energies = -435.171179

|   |              |              |              |
|---|--------------|--------------|--------------|
| C | -2.253531000 | -0.796041000 | -0.756280000 |
| C | -1.016950000 | -1.242356000 | -0.296411000 |
| C | -0.215763000 | -0.418546000 | 0.504255000  |
| C | -0.677747000 | 0.858734000  | 0.838134000  |
| C | -1.917042000 | 1.307463000  | 0.378927000  |
| C | -2.705959000 | 0.481648000  | -0.419971000 |
| H | -2.866486000 | -1.444673000 | -1.371889000 |
| H | -0.670988000 | -2.237290000 | -0.556743000 |
| H | -0.071701000 | 1.502903000  | 1.466696000  |
| H | -2.264922000 | 2.298318000  | 0.648183000  |
| H | -3.669792000 | 0.827955000  | -0.775473000 |
| C | 1.135676000  | -0.896450000 | 0.981099000  |
| H | 1.462321000  | -0.330521000 | 1.857601000  |
| H | 1.105708000  | -1.951319000 | 1.247292000  |
| N | 2.196036000  | -0.815487000 | -0.076191000 |
| N | 2.499316000  | 0.311274000  | -0.454349000 |
| N | 2.859471000  | 1.299630000  | -0.882915000 |

### A3

Zero-point correction = 0.234901 (Hartree/Particle)

Thermal correction to Energy = 0.248853

Thermal correction to Enthalpy = 0.249798

Thermal correction to Gibbs Free Energy = 0.190622

Sum of electronic and zero-point Energies = -743.094268

Sum of electronic and thermal Energies = -743.080316

Sum of electronic and thermal Enthalpies = -743.079372

Sum of electronic and thermal Free Energies = -743.138547

|   |             |              |              |
|---|-------------|--------------|--------------|
| C | 4.753645000 | 1.419732000  | -0.295521000 |
| C | 3.840309000 | 0.669516000  | -1.039119000 |
| C | 2.976830000 | -0.232498000 | -0.411679000 |
| C | 3.041964000 | -0.369617000 | 0.980240000  |
| C | 3.948899000 | 0.380719000  | 1.725879000  |



|   |              |              |              |
|---|--------------|--------------|--------------|
| C | 4.809749000  | 1.278016000  | 1.089847000  |
| H | 5.414501000  | 2.116918000  | -0.798749000 |
| H | 3.797513000  | 0.790050000  | -2.116877000 |
| H | 2.374861000  | -1.064070000 | 1.479550000  |
| H | 3.986267000  | 0.264617000  | 2.803540000  |
| H | 5.515208000  | 1.861810000  | 1.670445000  |
| C | 2.013897000  | -1.069536000 | -1.234202000 |
| H | 2.029408000  | -0.736407000 | -2.272284000 |
| H | 2.320284000  | -2.118745000 | -1.213928000 |
| N | 0.633858000  | -1.025698000 | -0.761550000 |
| N | 0.178784000  | -2.084949000 | -0.011051000 |
| N | -1.049910000 | -1.796038000 | 0.305040000  |
| C | -3.060801000 | 1.225540000  | -0.649200000 |
| C | -2.705423000 | 0.005195000  | -0.044377000 |
| C | -3.678098000 | -0.635331000 | 0.746909000  |
| C | -4.944138000 | -0.080956000 | 0.924007000  |
| C | -5.280054000 | 1.130806000  | 0.317246000  |
| C | -4.326303000 | 1.778977000  | -0.470970000 |
| H | -2.327463000 | 1.733499000  | -1.263871000 |
| H | -3.429537000 | -1.575088000 | 1.224776000  |
| H | -5.672518000 | -0.598064000 | 1.540286000  |
| H | -6.265419000 | 1.561662000  | 0.455537000  |
| H | -4.570336000 | 2.721161000  | -0.951041000 |
| C | -1.367096000 | -0.572540000 | -0.236263000 |
| C | -0.275363000 | -0.029782000 | -0.950207000 |

#### A4

Zero-point correction = 0.248442 (Hartree/Particle)

Thermal correction to Energy = 0.262552

Thermal correction to Enthalpy = 0.263496

Thermal correction to Gibbs Free Energy = 0.202966

Sum of electronic and zero-point Energies = -743.603633

Sum of electronic and thermal Energies = -743.589523

Sum of electronic and thermal Enthalpies = -743.588579

Sum of electronic and thermal Free Energies = -743.649109

|   |              |              |              |
|---|--------------|--------------|--------------|
| C | -4.406934000 | 1.652920000  | 0.401351000  |
| C | -3.554249000 | 0.770323000  | 1.066685000  |
| C | -2.977525000 | -0.305544000 | 0.387506000  |
| C | -3.267271000 | -0.489926000 | -0.969645000 |
| C | -4.114552000 | 0.392087000  | -1.635737000 |
| C | -4.686781000 | 1.466342000  | -0.950930000 |
| H | -4.849295000 | 2.483329000  | 0.939788000  |
| H | -3.339052000 | 0.919692000  | 2.119532000  |
| H | -2.829141000 | -1.325405000 | -1.505419000 |
| H | -4.332891000 | 0.239449000  | -2.686594000 |
| H | -5.348260000 | 2.151002000  | -1.469455000 |
| C | -2.059685000 | -1.267405000 | 1.113865000  |
| H | -2.065629000 | -1.072168000 | 2.186594000  |
| H | -2.363837000 | -2.302018000 | 0.954241000  |
| N | -0.667707000 | -1.194966000 | 0.647799000  |

|   |              |              |              |
|---|--------------|--------------|--------------|
| N | -0.141531000 | -2.189985000 | -0.089155000 |
| N | 1.086098000  | -1.858879000 | -0.382081000 |
| C | 2.877004000  | 1.345125000  | 0.397726000  |
| C | 2.682346000  | 0.009728000  | 0.012730000  |
| C | 3.768851000  | -0.701309000 | -0.519404000 |
| C | 5.013561000  | -0.092907000 | -0.660272000 |
| C | 5.198100000  | 1.234255000  | -0.270909000 |
| C | 4.123796000  | 1.949715000  | 0.259266000  |
| H | 2.051464000  | 1.920376000  | 0.801090000  |
| H | 3.631493000  | -1.732978000 | -0.818129000 |
| H | 5.842124000  | -0.657947000 | -1.072402000 |
| H | 6.167800000  | 1.706220000  | -0.379984000 |
| H | 4.254500000  | 2.982599000  | 0.561669000  |
| C | 1.371448000  | -0.636976000 | 0.161761000  |
| C | 0.236667000  | -0.207005000 | 0.828379000  |
| H | 0.014050000  | 0.678125000  | 1.398902000  |

### PA (phenylacetylene)

Zero-point correction = 0.109099 (Hartree/Particle)

Thermal correction to Energy = 0.115526

Thermal correction to Enthalpy = 0.116470

Thermal correction to Gibbs Free Energy = 0.078666

Sum of electronic and zero-point Energies = -308.372595

Sum of electronic and thermal Energies = -308.366168

Sum of electronic and thermal Enthalpies = -308.365224

Sum of electronic and thermal Free Energies = -308.403028

|   |              |              |              |
|---|--------------|--------------|--------------|
| C | -0.119161000 | -1.212383000 | 0.000027000  |
| C | 0.593029000  | -0.000014000 | 0.000055000  |
| C | -0.119133000 | 1.212372000  | 0.000027000  |
| C | -1.510610000 | 1.207654000  | -0.000027000 |
| C | -2.210103000 | 0.000018000  | -0.000055000 |
| C | -1.510638000 | -1.207634000 | -0.000026000 |
| H | 0.424323000  | -2.149569000 | 0.000051000  |
| H | 0.424373000  | 2.149545000  | 0.000051000  |
| H | -2.049452000 | 2.148114000  | -0.000047000 |
| H | -3.293961000 | 0.000031000  | -0.000099000 |
| H | -2.049501000 | -2.148082000 | -0.000047000 |
| C | 2.022730000  | -0.000026000 | 0.000137000  |
| C | 3.229030000  | -0.000024000 | 0.000070000  |
| H | 4.293358000  | 0.000186000  | -0.001155000 |

### A1

Zero-point correction= 0.097215 (Hartree/Particle)

Thermal correction to Energy= 0.103458

Thermal correction to Enthalpy= 0.104402

Thermal correction to Gibbs Free Energy= 0.066858

Sum of electronic and zero-point Energies= -307.876782

Sum of electronic and thermal Energies= -307.870539

Sum of electronic and thermal Enthalpies= -307.869595

Sum of electronic and thermal Free Energies= -307.907139

|   |              |              |              |
|---|--------------|--------------|--------------|
| C | -0.048411000 | -1.206744000 | -0.000002000 |
| C | 0.685112000  | 0.000000000  | 0.000017000  |
| C | -0.048411000 | 1.206744000  | -0.000002000 |
| C | -1.440911000 | 1.204379000  | -0.000041000 |
| C | -2.147793000 | 0.000000000  | -0.000060000 |
| C | -1.440911000 | -1.204379000 | -0.000041000 |
| H | 0.490415000  | -2.147421000 | 0.000013000  |
| H | 0.490415000  | 2.147421000  | 0.000013000  |
| H | -1.977262000 | 2.147467000  | -0.000055000 |
| H | -3.231920000 | 0.000000000  | -0.000090000 |
| H | -1.977262000 | -2.147467000 | -0.000055000 |
| C | 2.116839000  | 0.000000000  | 0.000060000  |
| C | 3.358755000  | 0.000000000  | 0.000099000  |

## TS1

Zero-point correction = 0.440632 (Hartree/Particle)

Thermal correction to Energy = 0.467395

Thermal correction to Enthalpy = 0.468339

Thermal correction to Gibbs Free Energy = 0.379365

Sum of electronic and zero-point Energies = -1132.458785

Sum of electronic and thermal Energies = -1132.432022

Sum of electronic and thermal Enthalpies = -1132.431078

Sum of electronic and thermal Free Energies = -1132.520052

|   |              |              |              |
|---|--------------|--------------|--------------|
| C | -5.640659000 | 0.943951000  | -0.636984000 |
| C | -5.741910000 | -0.426461000 | -0.677313000 |
| C | -4.592221000 | -1.221964000 | -0.434174000 |
| C | -3.339084000 | -0.584279000 | -0.156852000 |
| C | -3.254760000 | 0.845667000  | -0.124043000 |
| C | -4.418946000 | 1.582673000  | -0.365370000 |
| H | -5.616771000 | -3.116621000 | -0.657273000 |
| H | -6.515828000 | 1.559094000  | -0.820571000 |
| H | -6.687218000 | -0.914170000 | -0.887515000 |
| C | -4.666493000 | -2.639002000 | -0.446173000 |
| C | -2.175930000 | -1.376287000 | 0.110833000  |
| H | -4.401497000 | 2.658127000  | -0.356114000 |
| C | -2.304500000 | -2.768248000 | 0.089565000  |
| C | -3.539033000 | -3.380693000 | -0.185916000 |
| H | -1.457356000 | -3.403509000 | 0.277400000  |
| H | -3.587849000 | -4.464899000 | -0.192742000 |
| C | -0.777397000 | 0.684202000  | 0.119974000  |
| N | -2.027283000 | 1.432628000  | 0.140662000  |
| N | -0.975478000 | -0.728975000 | 0.376738000  |
| C | 0.252587000  | -1.461438000 | 0.776471000  |
| H | 0.959317000  | -0.659036000 | 0.964724000  |
| C | -1.855142000 | 2.900193000  | 0.277847000  |
| H | -0.796371000 | 2.974451000  | 0.517043000  |
| C | 0.880942000  | -2.306394000 | -0.344364000 |
| H | 1.879645000  | -2.624386000 | -0.033083000 |
| H | 0.312441000  | -3.202602000 | -0.595214000 |

|   |              |              |              |
|---|--------------|--------------|--------------|
| H | 0.991060000  | -1.707040000 | -1.250566000 |
| C | 0.099986000  | -2.208101000 | 2.111738000  |
| H | 1.089265000  | -2.536645000 | 2.442999000  |
| H | -0.302775000 | -1.537604000 | 2.875507000  |
| H | -0.540258000 | -3.089046000 | 2.063965000  |
| C | -2.623009000 | 3.490397000  | 1.470374000  |
| H | -2.273492000 | 4.513158000  | 1.639877000  |
| H | -3.704619000 | 3.531813000  | 1.336632000  |
| H | -2.416694000 | 2.913218000  | 2.375793000  |
| C | -2.026680000 | 3.685004000  | -1.033122000 |
| H | -1.405645000 | 3.243019000  | -1.815775000 |
| H | -3.053569000 | 3.728187000  | -1.398427000 |
| H | -1.688265000 | 4.714245000  | -0.878937000 |
| N | 0.327929000  | 1.246991000  | -0.030606000 |
| C | 6.093339000  | -0.928696000 | -0.742716000 |
| C | 5.566606000  | 0.265269000  | -0.210299000 |
| C | 6.471556000  | 1.229290000  | 0.277689000  |
| C | 7.845006000  | 1.005687000  | 0.234486000  |
| C | 8.351219000  | -0.182313000 | -0.295914000 |
| C | 7.467746000  | -1.146884000 | -0.783702000 |
| H | 5.412786000  | -1.681626000 | -1.123105000 |
| H | 6.084889000  | 2.153881000  | 0.690492000  |
| H | 8.522522000  | 1.761750000  | 0.616010000  |
| H | 9.421016000  | -0.354275000 | -0.328718000 |
| H | 7.850400000  | -2.073265000 | -1.198006000 |
| C | 4.154039000  | 0.492127000  | -0.166885000 |
| C | 2.943847000  | 0.686453000  | -0.131460000 |
| H | 1.622029000  | 0.878359000  | -0.074088000 |

## A2 (Cyclization transition state)

Zero-point correction = 0.228611 (Hartree/Particle)

Thermal correction to Energy = 0.244183

Thermal correction to Enthalpy = 0.245128

Thermal correction to Gibbs Free Energy = 0.181749

Sum of electronic and zero-point Energies = -742.974256

Sum of electronic and thermal Energies = -742.958683

Sum of electronic and thermal Enthalpies = -742.957739

Sum of electronic and thermal Free Energies = -743.021117

|   |              |              |              |
|---|--------------|--------------|--------------|
| C | -5.047873000 | -1.333538000 | 0.225688000  |
| C | -3.837691000 | -1.111231000 | -0.427754000 |
| C | -3.279638000 | 0.172308000  | -0.482252000 |
| C | -3.962934000 | 1.228291000  | 0.128082000  |
| C | -5.177052000 | 1.009986000  | 0.782007000  |
| C | -5.721974000 | -0.272074000 | 0.833960000  |
| H | -5.468348000 | -2.332706000 | 0.257124000  |
| H | -3.319304000 | -1.939637000 | -0.899627000 |
| H | -3.544053000 | 2.228836000  | 0.090811000  |
| H | -5.694766000 | 1.840625000  | 1.248944000  |
| H | -6.664843000 | -0.444172000 | 1.340843000  |
| C | -1.958114000 | 0.409614000  | -1.184184000 |

|   |              |              |              |
|---|--------------|--------------|--------------|
| H | -1.947741000 | -0.094843000 | -2.151820000 |
| H | -1.815091000 | 1.480295000  | -1.365441000 |
| N | -0.797545000 | -0.159549000 | -0.478128000 |
| N | -0.389098000 | 0.435450000  | 0.566810000  |
| N | 0.607386000  | 0.624519000  | 1.147901000  |
| C | 3.864823000  | -1.231926000 | 0.408585000  |
| C | 3.221426000  | -0.190181000 | -0.296610000 |
| C | 3.960864000  | 0.992862000  | -0.520478000 |
| C | 5.271394000  | 1.121649000  | -0.068951000 |
| C | 5.890892000  | 0.079326000  | 0.624667000  |
| C | 5.175419000  | -1.097500000 | 0.858263000  |
| H | 3.320251000  | -2.149888000 | 0.599603000  |
| H | 3.491275000  | 1.810913000  | -1.055136000 |
| H | 5.812902000  | 2.042503000  | -0.259686000 |
| H | 6.910948000  | 0.182351000  | 0.976912000  |
| H | 5.641473000  | -1.917152000 | 1.395423000  |
| C | 1.878433000  | -0.332362000 | -0.775270000 |
| C | 0.944041000  | -0.613568000 | -1.578089000 |

#### TS<sub>A3-A4</sub>

Zero-point correction = 0.579109 (Hartree/Particle)

Thermal correction to Energy = 0.613595

Thermal correction to Enthalpy = 0.614539

Thermal correction to Gibbs Free Energy = 0.505858

Sum of electronic and zero-point Energies = -1567.681181

Sum of electronic and thermal Energies = -1567.646695

Sum of electronic and thermal Enthalpies = -1567.645750

Sum of electronic and thermal Free Energies = -1567.754432

|   |              |              |              |
|---|--------------|--------------|--------------|
| C | 5.894671000  | -1.514276000 | 1.134366000  |
| C | 6.268381000  | -1.058394000 | -0.107366000 |
| C | 5.332662000  | -0.350172000 | -0.904926000 |
| C | 4.007502000  | -0.127742000 | -0.406864000 |
| C | 3.636853000  | -0.617844000 | 0.886769000  |
| C | 4.598808000  | -1.302630000 | 1.635303000  |
| H | 6.695349000  | -0.016137000 | -2.554052000 |
| H | 6.605274000  | -2.054658000 | 1.751533000  |
| H | 7.269283000  | -1.225073000 | -0.489463000 |
| C | 5.691801000  | 0.155480000  | -2.181105000 |
| C | 3.061420000  | 0.605282000  | -1.192092000 |
| H | 4.364178000  | -1.691418000 | 2.610280000  |
| C | 3.466663000  | 1.084573000  | -2.440156000 |
| C | 4.768643000  | 0.857016000  | -2.918646000 |
| H | 2.788072000  | 1.634622000  | -3.067352000 |
| H | 5.035967000  | 1.247782000  | -3.895152000 |
| C | 1.283397000  | 0.083986000  | 0.466414000  |
| N | 2.342745000  | -0.397459000 | 1.335691000  |
| N | 1.783380000  | 0.806655000  | -0.680283000 |
| C | 0.791360000  | 1.690687000  | -1.345347000 |
| H | -0.042112000 | 1.682051000  | -0.650279000 |
| C | 1.885078000  | -0.809360000 | 2.687247000  |

|   |              |              |              |
|---|--------------|--------------|--------------|
| H | 0.857860000  | -0.451857000 | 2.688254000  |
| C | 0.230286000  | 1.143514000  | -2.668708000 |
| H | -0.658016000 | 1.719495000  | -2.941886000 |
| H | 0.928373000  | 1.201184000  | -3.504324000 |
| H | -0.072524000 | 0.101432000  | -2.550246000 |
| C | 1.256341000  | 3.153564000  | -1.426821000 |
| H | 0.410748000  | 3.772294000  | -1.740063000 |
| H | 1.580567000  | 3.502758000  | -0.443090000 |
| H | 2.069705000  | 3.324833000  | -2.132048000 |
| C | 2.612092000  | -0.072658000 | 3.822400000  |
| H | 2.076344000  | -0.257636000 | 4.758139000  |
| H | 3.647835000  | -0.379545000 | 3.971983000  |
| H | 2.602380000  | 1.005385000  | 3.640360000  |
| C | 1.782089000  | -2.330516000 | 2.884191000  |
| H | 1.203154000  | -2.773761000 | 2.070554000  |
| H | 2.743899000  | -2.842501000 | 2.934045000  |
| H | 1.252399000  | -2.532564000 | 3.820145000  |
| N | 0.075995000  | -0.071606000 | 0.762125000  |
| H | -1.039671000 | 0.186238000  | 0.174465000  |
| C | -4.201278000 | -5.185924000 | -0.903187000 |
| C | -3.615504000 | -4.100123000 | -1.556806000 |
| C | -3.123528000 | -3.011765000 | -0.831656000 |
| C | -3.230806000 | -3.025348000 | 0.563912000  |
| C | -3.819365000 | -4.105335000 | 1.218509000  |
| C | -4.305694000 | -5.190759000 | 0.486612000  |
| H | -4.579744000 | -6.021931000 | -1.480831000 |
| H | -3.543733000 | -4.099642000 | -2.639655000 |
| H | -2.855393000 | -2.184821000 | 1.137558000  |
| H | -3.896962000 | -4.101835000 | 2.300145000  |
| H | -4.763384000 | -6.030916000 | 0.996634000  |
| C | -2.452634000 | -1.856148000 | -1.551916000 |
| H | -1.381606000 | -1.849657000 | -1.342886000 |
| H | -2.584392000 | -1.962842000 | -2.629939000 |
| N | -2.955127000 | -0.542799000 | -1.154516000 |
| N | -4.181601000 | -0.146923000 | -1.596659000 |
| N | -4.400494000 | 1.027187000  | -1.073591000 |
| C | -2.230399000 | 2.929308000  | 1.323478000  |
| C | -3.278658000 | 2.651924000  | 0.427481000  |
| C | -4.274115000 | 3.630019000  | 0.255172000  |
| C | -4.222330000 | 4.836101000  | 0.950745000  |
| C | -3.175340000 | 5.099178000  | 1.835807000  |
| C | -2.179746000 | 4.136868000  | 2.015851000  |
| H | -1.454063000 | 2.187765000  | 1.475851000  |
| H | -5.089038000 | 3.437101000  | -0.431850000 |
| H | -5.002527000 | 5.574712000  | 0.799548000  |
| H | -3.135817000 | 6.038231000  | 2.376332000  |
| H | -1.360763000 | 4.326253000  | 2.701784000  |
| C | -3.324138000 | 1.375953000  | -0.299261000 |
| C | -2.355500000 | 0.360421000  | -0.336712000 |

## M062X Data:

### C-C

Zero-point correction = 0.353246 (Hartree/Particle)

Thermal correction to Energy = 0.371364

Thermal correction to Enthalpy = 0.372309

Thermal correction to Gibbs Free Energy = 0.308412

Sum of electronic and zero-point Energies = -824.256814

Sum of electronic and thermal Energies = -824.238696

Sum of electronic and thermal Enthalpies = -824.237751

Sum of electronic and thermal Free Energies = -824.301648

|   |              |              |              |
|---|--------------|--------------|--------------|
| C | -2.316344000 | 2.554651000  | -0.629067000 |
| C | -1.188992000 | 3.269277000  | -0.319128000 |
| C | 0.008308000  | 2.582863000  | 0.010358000  |
| C | 0.002857000  | 1.165064000  | 0.015286000  |
| C | -1.205987000 | 0.445935000  | -0.197165000 |
| C | -2.339635000 | 1.144498000  | -0.568340000 |
| H | 1.220499000  | 4.345904000  | 0.335370000  |
| H | -3.226611000 | 3.072892000  | -0.909616000 |
| H | -1.189926000 | 4.353456000  | -0.329155000 |
| C | 1.212060000  | 3.261653000  | 0.332923000  |
| C | 1.207351000  | 0.443464000  | 0.231049000  |
| H | -3.261695000 | 0.633663000  | -0.795459000 |
| C | 2.347914000  | 1.132031000  | 0.594561000  |
| C | 2.336313000  | 2.542837000  | 0.644741000  |
| H | 3.265055000  | 0.611378000  | 0.822537000  |
| H | 3.250492000  | 3.057419000  | 0.919018000  |
| C | -0.007609000 | -1.662618000 | 0.064434000  |
| N | -1.193443000 | -0.929917000 | 0.057389000  |
| N | 1.181667000  | -0.938322000 | -0.008638000 |
| C | 2.405886000  | -1.667964000 | -0.432481000 |
| H | 2.025939000  | -2.541694000 | -0.960009000 |
| C | -2.441467000 | -1.672895000 | 0.371617000  |
| H | -2.079577000 | -2.575028000 | 0.855856000  |
| C | 3.249922000  | -2.160235000 | 0.742026000  |
| H | 4.045911000  | -2.806665000 | 0.363881000  |
| H | 3.716272000  | -1.336918000 | 1.285178000  |
| H | 2.649122000  | -2.738078000 | 1.448317000  |
| C | 3.226728000  | -0.907298000 | -1.475025000 |
| H | 3.862789000  | -1.633960000 | -1.985567000 |
| H | 2.576038000  | -0.445166000 | -2.221034000 |
| H | 3.876210000  | -0.142952000 | -1.051716000 |
| C | -3.190678000 | -2.115298000 | -0.882995000 |
| H | -4.034335000 | -2.746656000 | -0.591830000 |
| H | -3.583648000 | -1.276024000 | -1.459120000 |
| H | -2.535391000 | -2.701990000 | -1.530371000 |
| C | -3.328015000 | -0.961569000 | 1.395058000  |
| H | -2.725092000 | -0.529094000 | 2.197353000  |
| H | -3.959835000 | -0.181225000 | 0.973480000  |
| H | -3.986909000 | -1.712022000 | 1.838241000  |

|   |              |              |             |
|---|--------------|--------------|-------------|
| N | -0.076204000 | -2.946904000 | 0.119908000 |
| H | 0.838891000  | -3.367608000 | 0.226916000 |

**C-C'**

Zero-point correction = 0.338379 (Hartree/Particle)

Thermal correction to Energy = 0.356842

Thermal correction to Enthalpy = 0.357786

Thermal correction to Gibbs Free Energy= 0.292601

Sum of electronic and zero-point Energies= -823.747609

Sum of electronic and thermal Energies= -823.729147

Sum of electronic and thermal Enthalpies= -823.728202

Sum of electronic and thermal Free Energies= -823.793387

|   |              |              |              |
|---|--------------|--------------|--------------|
| C | 2.409407000  | 2.579470000  | -0.052692000 |
| C | 1.233279000  | 3.283347000  | -0.089217000 |
| C | -0.000011000 | 2.581520000  | -0.076664000 |
| C | -0.000005000 | 1.157660000  | -0.033655000 |
| C | 1.241768000  | 0.438662000  | 0.002939000  |
| C | 2.428845000  | 1.175470000  | -0.006258000 |
| H | -1.223027000 | 4.366987000  | -0.123445000 |
| H | 3.357580000  | 3.107455000  | -0.062008000 |
| H | 1.222986000  | 4.366999000  | -0.123453000 |
| C | -1.233309000 | 3.283335000  | -0.089207000 |
| C | -1.241770000 | 0.438651000  | 0.002948000  |
| H | 3.385683000  | 0.683270000  | 0.010284000  |
| C | -2.428854000 | 1.175448000  | -0.006240000 |
| C | -2.409429000 | 2.579447000  | -0.052674000 |
| H | -3.385687000 | 0.683237000  | 0.010307000  |
| H | -3.357608000 | 3.107423000  | -0.061983000 |
| C | 0.000007000  | -1.699982000 | -0.322731000 |
| N | 1.203070000  | -0.935771000 | 0.047602000  |
| N | -1.203061000 | -0.935782000 | 0.047601000  |
| C | -2.420326000 | -1.756472000 | 0.165081000  |
| H | -2.014617000 | -2.764274000 | 0.228080000  |
| C | 2.420339000  | -1.756455000 | 0.165097000  |
| H | 2.014633000  | -2.764254000 | 0.228146000  |
| C | -3.311793000 | -1.752062000 | -1.080569000 |
| H | -4.072919000 | -2.530561000 | -0.975252000 |
| H | -3.828705000 | -0.806785000 | -1.248695000 |
| H | -2.718557000 | -1.980986000 | -1.968885000 |
| C | -3.191104000 | -1.512334000 | 1.465078000  |
| H | -3.882118000 | -2.345718000 | 1.618253000  |
| H | -2.503252000 | -1.487153000 | 2.314190000  |
| H | -3.780531000 | -0.595582000 | 1.474804000  |
| C | 3.191139000  | -1.512262000 | 1.465073000  |
| H | 3.882140000  | -2.345649000 | 1.618281000  |
| H | 3.780582000  | -0.595519000 | 1.474742000  |
| H | 2.503299000  | -1.487025000 | 2.314193000  |
| C | 3.311791000  | -1.752100000 | -1.080564000 |
| H | 2.718543000  | -1.981055000 | -1.968864000 |
| H | 3.828707000  | -0.806835000 | -1.248733000 |



|   |             |              |              |
|---|-------------|--------------|--------------|
| H | 4.072912000 | -2.530601000 | -0.975226000 |
| N | 0.000009000 | -2.842938000 | -0.779376000 |

### BA (benzyl azide)

Zero-point correction = 0.133127 (Hartree/Particle)  
Thermal correction to Energy = 0.141483  
Thermal correction to Enthalpy = 0.142427  
Thermal correction to Gibbs Free Energy = 0.098305  
Sum of electronic and zero-point Energies = -434.945350  
Sum of electronic and thermal Energies = -434.936994  
Sum of electronic and thermal Enthalpies = -434.936050  
Sum of electronic and thermal Free Energies = -434.980171

|   |              |              |              |
|---|--------------|--------------|--------------|
| C | -2.251752000 | -0.749169000 | -0.716567000 |
| C | -1.027536000 | -1.267807000 | -0.309459000 |
| C | -0.164684000 | -0.504021000 | 0.479793000  |
| C | -0.540847000 | 0.788133000  | 0.850361000  |
| C | -1.766559000 | 1.309385000  | 0.441707000  |
| C | -2.622736000 | 0.541270000  | -0.341493000 |
| H | -2.918433000 | -1.350913000 | -1.323812000 |
| H | -0.736252000 | -2.272299000 | -0.600085000 |
| H | 0.125128000  | 1.382914000  | 1.468344000  |
| H | -2.052352000 | 2.312258000  | 0.737919000  |
| H | -3.578297000 | 0.944343000  | -0.657200000 |
| C | 1.184970000  | -1.042801000 | 0.873556000  |
| H | 1.530582000  | -0.587314000 | 1.805128000  |
| H | 1.161181000  | -2.123499000 | 0.992403000  |
| N | 2.207623000  | -0.800357000 | -0.190721000 |
| N | 2.350282000  | 0.385225000  | -0.467620000 |
| N | 2.528281000  | 1.450071000  | -0.783100000 |

### A3

Zero-point correction = 0.238016 (Hartree/Particle)  
Thermal correction to Energy = 0.251750  
Thermal correction to Enthalpy = 0.252695  
Thermal correction to Gibbs Free Energy = 0.194443  
Sum of electronic and zero-point Energies = -742.797255  
Sum of electronic and thermal Energies = -742.783520  
Sum of electronic and thermal Enthalpies = -742.782576  
Sum of electronic and thermal Free Energies = -742.840827

|   |             |              |              |
|---|-------------|--------------|--------------|
| C | 5.182049000 | 0.631454000  | -0.341161000 |
| C | 4.276678000 | -0.334961000 | -0.763945000 |
| C | 2.958450000 | -0.327213000 | -0.300850000 |
| C | 2.560251000 | 0.665821000  | 0.591889000  |
| C | 3.467667000 | 1.636404000  | 1.015637000  |
| C | 4.778939000 | 1.622935000  | 0.552390000  |
| H | 6.201461000 | 0.613261000  | -0.710132000 |
| H | 4.591788000 | -1.104991000 | -1.461825000 |
| H | 1.539695000 | 0.687960000  | 0.959578000  |
| H | 3.144723000 | 2.404439000  | 1.709585000  |

|   |              |              |              |
|---|--------------|--------------|--------------|
| H | 5.482484000  | 2.378734000  | 0.882397000  |
| C | 2.016624000  | -1.413274000 | -0.781245000 |
| H | 2.021239000  | -1.452420000 | -1.871021000 |
| H | 2.352939000  | -2.383027000 | -0.406829000 |
| N | 0.646504000  | -1.219085000 | -0.349282000 |
| N | 0.287640000  | -1.736304000 | 0.847137000  |
| N | -0.934270000 | -1.364811000 | 1.054215000  |
| C | -3.129471000 | 0.727910000  | -1.135380000 |
| C | -2.703946000 | -0.052221000 | -0.050715000 |
| C | -3.615257000 | -0.286768000 | 0.989305000  |
| C | -4.902093000 | 0.239952000  | 0.945383000  |
| C | -5.312305000 | 1.013807000  | -0.137886000 |
| C | -4.416188000 | 1.253694000  | -1.177953000 |
| H | -2.440946000 | 0.920374000  | -1.950170000 |
| H | -3.308203000 | -0.887888000 | 1.837126000  |
| H | -5.588071000 | 0.044024000  | 1.762454000  |
| H | -6.315320000 | 1.423512000  | -0.171612000 |
| H | -4.720649000 | 1.854037000  | -2.028486000 |
| C | -1.340397000 | -0.607030000 | -0.009563000 |
| C | -0.314376000 | -0.479947000 | -0.965166000 |

#### A4

Zero-point correction = 0.251217 (Hartree/Particle)

Thermal correction to Energy = 0.265153

Thermal correction to Enthalpy = 0.266097

Thermal correction to Gibbs Free Energy = 0.206719

Sum of electronic and zero-point Energies = -743.299928

Sum of electronic and thermal Energies = -743.285992

Sum of electronic and thermal Enthalpies = -743.285048

Sum of electronic and thermal Free Energies = -743.344426

|   |              |              |              |
|---|--------------|--------------|--------------|
| C | -4.851026000 | 1.126589000  | 0.505865000  |
| C | -4.004034000 | 0.161408000  | 1.044434000  |
| C | -2.941122000 | -0.339692000 | 0.294865000  |
| C | -2.726161000 | 0.140444000  | -0.997483000 |
| C | -3.569366000 | 1.108870000  | -1.533429000 |
| C | -4.635052000 | 1.602566000  | -0.784116000 |
| H | -5.673914000 | 1.511186000  | 1.097644000  |
| H | -4.166032000 | -0.203451000 | 2.053619000  |
| H | -1.897702000 | -0.239790000 | -1.587638000 |
| H | -3.394131000 | 1.477948000  | -2.537573000 |
| H | -5.290350000 | 2.357815000  | -1.202673000 |
| C | -2.064616000 | -1.423145000 | 0.882787000  |
| H | -2.092870000 | -1.392614000 | 1.972087000  |
| H | -2.390796000 | -2.411849000 | 0.555349000  |
| N | -0.676062000 | -1.297788000 | 0.456710000  |
| N | -0.159441000 | -2.134994000 | -0.439709000 |
| N | 1.061767000  | -1.764231000 | -0.671954000 |
| C | 2.849618000  | 1.224604000  | 0.688173000  |
| C | 2.660795000  | -0.004251000 | 0.047660000  |
| C | 3.737358000  | -0.597526000 | -0.618893000 |

|   |              |              |              |
|---|--------------|--------------|--------------|
| C | 4.978816000  | 0.028813000  | -0.642687000 |
| C | 5.162013000  | 1.251171000  | -0.000923000 |
| C | 4.092834000  | 1.846155000  | 0.664977000  |
| H | 2.020663000  | 1.698811000  | 1.202490000  |
| H | 3.599365000  | -1.551445000 | -1.114276000 |
| H | 5.806267000  | -0.441532000 | -1.161673000 |
| H | 6.130709000  | 1.737069000  | -0.019681000 |
| H | 4.225664000  | 2.798661000  | 1.165213000  |
| C | 1.348500000  | -0.664704000 | 0.077373000  |
| C | 0.219753000  | -0.357291000 | 0.810456000  |
| H | -0.010582000 | 0.414195000  | 1.527419000  |

### PA (phenylacetylene)

Zero-point correction = 0.110185 (Hartree/Particle)

Thermal correction to Energy = 0.116554

Thermal correction to Enthalpy = 0.117498

Thermal correction to Gibbs Free Energy = 0.079785

Sum of electronic and zero-point Energies = -308.235104

Sum of electronic and thermal Energies = -308.228736

Sum of electronic and thermal Enthalpies = -308.227792

Sum of electronic and thermal Free Energies = -308.265505

|   |              |              |              |
|---|--------------|--------------|--------------|
| C | -0.118344000 | -1.211258000 | 0.000017000  |
| C | 0.584625000  | 0.000024000  | 0.000036000  |
| C | -0.118394000 | 1.211277000  | 0.000017000  |
| C | -1.507800000 | 1.206344000  | -0.000018000 |
| C | -2.204293000 | -0.000034000 | -0.000037000 |
| C | -1.507751000 | -1.206383000 | -0.000019000 |
| H | 0.429490000  | -2.146282000 | 0.000034000  |
| H | 0.429401000  | 2.146323000  | 0.000033000  |
| H | -2.047552000 | 2.146106000  | -0.000031000 |
| H | -3.288207000 | -0.000056000 | -0.000066000 |
| H | -2.047463000 | -2.146167000 | -0.000032000 |
| C | 2.020259000  | 0.000056000  | 0.000097000  |
| C | 3.223737000  | 0.000067000  | 0.000057000  |
| H | 4.292100000  | -0.000479000 | -0.000833000 |

### A1

Zero-point correction = 0.098327 (Hartree/Particle)

Thermal correction to Energy = 0.104561

Thermal correction to Enthalpy = 0.105505

Thermal correction to Gibbs Free Energy = 0.067920

Sum of electronic and zero-point Energies = -307.747691

Sum of electronic and thermal Energies = -307.741457

Sum of electronic and thermal Enthalpies = -307.740513

Sum of electronic and thermal Free Energies = -307.778098

|   |              |              |              |
|---|--------------|--------------|--------------|
| C | -0.046888000 | -1.205763000 | -0.000005000 |
| C | 0.674219000  | 0.000000000  | 0.000013000  |
| C | -0.046888000 | 1.205763000  | -0.000005000 |
| C | -1.437061000 | 1.203285000  | -0.000041000 |

|   |              |              |              |
|---|--------------|--------------|--------------|
| C | -2.139534000 | 0.000000000  | -0.000059000 |
| C | -1.437061000 | -1.203284000 | -0.000041000 |
| H | 0.495415000  | -2.144665000 | 0.000010000  |
| H | 0.495415000  | 2.144665000  | 0.000010000  |
| H | -1.973980000 | 2.145431000  | -0.000054000 |
| H | -3.223479000 | 0.000000000  | -0.000085000 |
| H | -1.973981000 | -2.145431000 | -0.000054000 |
| C | 2.113751000  | 0.000000000  | 0.000059000  |
| C | 3.349563000  | 0.000000000  | 0.000107000  |

## TS1

Zero-point correction = 0.446074 (Hartree/Particle)

Thermal correction to Energy = 0.472241

Thermal correction to Enthalpy = 0.473185

Thermal correction to Gibbs Free Energy = 0.386703

Sum of electronic and zero-point Energies = -1131.987505

Sum of electronic and thermal Energies = -1131.961338

Sum of electronic and thermal Enthalpies = -1131.960394

Sum of electronic and thermal Free Energies = -1132.046876

|   |              |              |              |
|---|--------------|--------------|--------------|
| C | -5.666959000 | 0.714108000  | -0.557442000 |
| C | -5.669059000 | -0.651869000 | -0.664874000 |
| C | -4.459779000 | -1.367961000 | -0.473072000 |
| C | -3.263646000 | -0.658285000 | -0.169121000 |
| C | -3.282062000 | 0.769888000  | -0.062690000 |
| C | -4.492896000 | 1.430093000  | -0.263414000 |
| H | -5.343747000 | -3.315031000 | -0.803869000 |
| H | -6.585560000 | 1.271877000  | -0.707066000 |
| H | -6.575357000 | -1.200397000 | -0.895485000 |
| C | -4.427933000 | -2.782781000 | -0.572526000 |
| C | -2.041197000 | -1.372166000 | 0.044464000  |
| H | -4.556501000 | 2.503033000  | -0.214243000 |
| C | -2.055092000 | -2.759066000 | -0.077806000 |
| C | -3.244889000 | -3.445991000 | -0.379366000 |
| H | -1.155172000 | -3.336102000 | 0.042579000  |
| H | -3.208185000 | -4.527149000 | -0.462893000 |
| C | -0.808880000 | 0.771899000  | 0.131867000  |
| N | -2.099875000 | 1.424431000  | 0.222758000  |
| N | -0.904321000 | -0.650372000 | 0.361203000  |
| C | 0.373567000  | -1.307479000 | 0.705316000  |
| H | 0.992590000  | -0.481245000 | 1.044033000  |
| C | -2.038673000 | 2.885554000  | 0.427018000  |
| H | -1.001756000 | 3.037726000  | 0.714859000  |
| C | 1.090111000  | -1.922085000 | -0.498670000 |
| H | 2.088307000  | -2.249940000 | -0.194719000 |
| H | 0.565671000  | -2.785460000 | -0.911141000 |
| H | 1.208538000  | -1.178421000 | -1.289906000 |
| C | 0.274040000  | -2.258306000 | 1.903987000  |
| H | 1.269355000  | -2.344282000 | 2.347502000  |
| H | -0.396606000 | -1.850368000 | 2.664373000  |
| H | -0.055112000 | -3.266759000 | 1.656329000  |

|   |              |              |              |
|---|--------------|--------------|--------------|
| C | -2.888238000 | 3.370816000  | 1.605096000  |
| H | -2.522201000 | 4.356277000  | 1.904955000  |
| H | -3.951143000 | 3.472984000  | 1.389047000  |
| H | -2.773365000 | 2.697862000  | 2.458692000  |
| C | -2.235906000 | 3.699422000  | -0.853604000 |
| H | -1.534943000 | 3.364057000  | -1.621640000 |
| H | -3.245478000 | 3.638620000  | -1.261446000 |
| H | -2.025587000 | 4.751549000  | -0.641972000 |
| N | 0.252095000  | 1.399996000  | -0.042428000 |
| C | 5.962590000  | -0.925927000 | 0.203250000  |
| C | 5.485402000  | 0.335479000  | -0.182495000 |
| C | 6.404116000  | 1.311503000  | -0.595204000 |
| C | 7.764968000  | 1.029691000  | -0.621081000 |
| C | 8.230136000  | -0.225799000 | -0.236247000 |
| C | 7.324630000  | -1.201149000 | 0.175775000  |
| H | 5.257049000  | -1.684538000 | 0.523154000  |
| H | 6.041785000  | 2.288261000  | -0.894820000 |
| H | 8.464141000  | 1.793150000  | -0.942906000 |
| H | 9.291878000  | -0.442929000 | -0.257318000 |
| H | 7.679744000  | -2.180192000 | 0.476908000  |
| C | 4.076193000  | 0.618346000  | -0.156196000 |
| C | 2.877611000  | 0.843762000  | -0.135832000 |
| H | 1.607434000  | 1.038836000  | -0.096528000 |

## A2 (transition state for cyclization)

Zero-point correction = 0.231734 (Hartree/Particle)

Thermal correction to Energy = 0.246922

Thermal correction to Enthalpy = 0.247866

Thermal correction to Gibbs Free Energy = 0.186028

Sum of electronic and zero-point Energies = -742.656001

Sum of electronic and thermal Energies = -742.640813

Sum of electronic and thermal Enthalpies = -742.639869

Sum of electronic and thermal Free Energies = -742.701707

|   |              |              |              |
|---|--------------|--------------|--------------|
| C | -4.833807000 | 0.981610000  | -0.308018000 |
| C | -4.262672000 | -0.288847000 | -0.301886000 |
| C | -2.959140000 | -0.479167000 | 0.157241000  |
| C | -2.227705000 | 0.625530000  | 0.601855000  |
| C | -2.795786000 | 1.896099000  | 0.590591000  |
| C | -4.100800000 | 2.077948000  | 0.137346000  |
| H | -5.847963000 | 1.114672000  | -0.667877000 |
| H | -4.832888000 | -1.140761000 | -0.658932000 |
| H | -1.211152000 | 0.484432000  | 0.956197000  |
| H | -2.218247000 | 2.746193000  | 0.936523000  |
| H | -4.541073000 | 3.068572000  | 0.127533000  |
| C | -2.364137000 | -1.869347000 | 0.183298000  |
| H | -2.414921000 | -2.284837000 | 1.193321000  |
| H | -2.939284000 | -2.533178000 | -0.468457000 |
| N | -0.942182000 | -1.932040000 | -0.155337000 |
| N | -0.529363000 | -1.244732000 | -1.122620000 |
| N | 0.418086000  | -0.664255000 | -1.447700000 |

|   |             |              |              |
|---|-------------|--------------|--------------|
| C | 2.636784000 | 1.168658000  | -0.076602000 |
| C | 2.660748000 | -0.189721000 | 0.283462000  |
| C | 3.908919000 | -0.830211000 | 0.359749000  |
| C | 5.084883000 | -0.135848000 | 0.094443000  |
| C | 5.046771000 | 1.213002000  | -0.251347000 |
| C | 3.814619000 | 1.860315000  | -0.333260000 |
| H | 1.680211000 | 1.674486000  | -0.153855000 |
| H | 3.947552000 | -1.879779000 | 0.629709000  |
| H | 6.036194000 | -0.652706000 | 0.160241000  |
| H | 5.964069000 | 1.752611000  | -0.456892000 |
| H | 3.770120000 | 2.909832000  | -0.603528000 |
| C | 1.438596000 | -0.904576000 | 0.571492000  |
| C | 0.616325000 | -1.520839000 | 1.305904000  |

### TS<sub>A3-A4</sub>

Zero-point correction = 0.586406 (Hartree/Particle)

Thermal correction to Energy = 0.620069

Thermal correction to Enthalpy = 0.621013

Thermal correction to Gibbs Free Energy = 0.517281

Sum of electronic and zero-point Energies = -1567.048910

Sum of electronic and thermal Energies = -1567.015246

Sum of electronic and thermal Enthalpies = -1567.014302

Sum of electronic and thermal Free Energies = -1567.118035

|   |              |              |              |
|---|--------------|--------------|--------------|
| C | 5.697840000  | -2.126107000 | 0.198405000  |
| C | 6.092469000  | -1.104594000 | -0.624700000 |
| C | 5.164743000  | -0.088533000 | -0.969767000 |
| C | 3.840429000  | -0.141237000 | -0.450384000 |
| C | 3.452338000  | -1.210345000 | 0.418179000  |
| C | 4.392479000  | -2.192496000 | 0.718367000  |
| H | 6.551058000  | 1.015997000  | -2.210176000 |
| H | 6.396675000  | -2.913490000 | 0.460662000  |
| H | 7.099377000  | -1.055963000 | -1.023651000 |
| C | 5.539870000  | 0.982468000  | -1.820563000 |
| C | 2.896386000  | 0.879609000  | -0.787716000 |
| H | 4.140153000  | -3.031152000 | 1.343247000  |
| C | 3.306215000  | 1.905560000  | -1.634062000 |
| C | 4.619969000  | 1.947418000  | -2.135364000 |
| H | 2.626119000  | 2.682181000  | -1.936713000 |
| H | 4.894408000  | 2.766955000  | -2.791201000 |
| C | 1.112654000  | -0.401149000 | 0.354697000  |
| N | 2.161187000  | -1.221148000 | 0.912587000  |
| N | 1.616257000  | 0.796558000  | -0.264646000 |
| C | 0.608620000  | 1.853360000  | -0.494079000 |
| H | -0.216606000 | 1.546148000  | 0.137854000  |
| C | 1.701922000  | -2.232423000 | 1.887583000  |
| H | 0.705876000  | -1.879385000 | 2.140279000  |
| C | 0.062739000  | 1.889090000  | -1.922757000 |
| H | -0.793485000 | 2.569594000  | -1.958414000 |
| H | 0.792334000  | 2.232055000  | -2.657537000 |
| H | -0.286710000 | 0.896801000  | -2.220112000 |

|   |              |              |              |
|---|--------------|--------------|--------------|
| C | 1.018565000  | 3.228109000  | 0.043282000  |
| H | 0.109891000  | 3.830626000  | 0.143943000  |
| H | 1.465875000  | 3.130351000  | 1.036127000  |
| H | 1.706672000  | 3.782693000  | -0.593508000 |
| C | 2.503833000  | -2.230911000 | 3.192775000  |
| H | 1.883580000  | -2.683642000 | 3.970688000  |
| H | 3.435355000  | -2.794498000 | 3.155545000  |
| H | 2.731158000  | -1.207184000 | 3.500782000  |
| C | 1.509555000  | -3.625561000 | 1.285277000  |
| H | 0.854727000  | -3.571321000 | 0.412338000  |
| H | 2.443036000  | -4.102446000 | 0.983310000  |
| H | 1.030681000  | -4.271335000 | 2.026898000  |
| N | -0.093883000 | -0.698404000 | 0.485019000  |
| H | -1.203859000 | -0.108702000 | 0.066186000  |
| C | -5.314406000 | -3.992846000 | -0.551432000 |
| C | -4.775257000 | -3.002525000 | -1.369507000 |
| C | -3.484860000 | -2.526153000 | -1.140762000 |
| C | -2.736572000 | -3.049554000 | -0.084450000 |
| C | -3.274779000 | -4.038620000 | 0.733529000  |
| C | -4.564898000 | -4.511706000 | 0.501156000  |
| H | -6.317601000 | -4.359797000 | -0.737101000 |
| H | -5.357348000 | -2.597363000 | -2.191418000 |
| H | -1.734486000 | -2.669672000 | 0.097356000  |
| H | -2.687186000 | -4.441914000 | 1.550983000  |
| H | -4.983340000 | -5.283816000 | 1.136927000  |
| C | -2.909251000 | -1.425118000 | -1.999620000 |
| H | -1.835053000 | -1.563303000 | -2.132972000 |
| H | -3.390660000 | -1.399534000 | -2.977017000 |
| N | -3.105574000 | -0.112683000 | -1.388750000 |
| N | -4.104561000 | 0.675996000  | -1.816037000 |
| N | -4.065837000 | 1.755530000  | -1.095497000 |
| C | -1.956818000 | 2.445263000  | 1.888868000  |
| C | -2.683493000 | 2.725462000  | 0.723894000  |
| C | -3.011556000 | 4.056855000  | 0.441535000  |
| C | -2.619629000 | 5.079794000  | 1.300029000  |
| C | -1.888893000 | 4.792082000  | 2.450597000  |
| C | -1.559310000 | 3.469150000  | 2.741105000  |
| H | -1.702913000 | 1.415354000  | 2.121007000  |
| H | -3.564080000 | 4.288001000  | -0.462452000 |
| H | -2.878156000 | 6.106290000  | 1.064327000  |
| H | -1.579382000 | 5.590732000  | 3.115046000  |
| H | -0.993733000 | 3.233977000  | 3.636051000  |
| C | -3.045125000 | 1.640873000  | -0.198848000 |
| C | -2.395028000 | 0.417419000  | -0.367939000 |

## 6. References

1. G. M. Sheldrick, *Acta Crystallogr. Sect. A Found. Crystallogr.* 2015, **71**, 3–8.
2. G. M. Sheldrick, *Acta Crystallogr. Sect. C Struct. Chem.* 2015, **71**, 3–8.
3. R. Krishnan, J. S Binkley, R. Seeger, J. A. Pople; Self-Consistent Molecular Orbital Methods. XX. A Basis Set for Correlated Wave Functions. *J. Chem. Phys.* 1980, **72**, 650–655.
4. Y. Zhao, D. G. Truhlar; Density Functionals with Broad Applicability in Chemistry. *Acc. Chem. Res.* 2008, **41**, 157–167.
5. A. D. Becke; *J. Chem. Phys.* 1992, **96**, 2155–2160.
6. A. D. Becke; *J. Chem. Phys.* 1993, **98**, 5648–5652.
7. C. Lee, W. Yang, R. G. Parr; *Phys. Rev. B* 1988, **37**, 785–789.
8. C. Gonzales, H. B. Schlegel; Improved Algorithms for Reaction Path Following: Higher-Order Implicit Algorithms. *J. Phys. Chem.* 1991, **95**, 5853–5860.
9. A. V. Marenich, R. M. Olson, C. P. Kelly, C. J. Cramer, D. G. Truhlar; Self-Consistent Reaction Field Model for Aqueous and Nonaqueous Solutions Based on Accurate Polarized Partial Charges. *J. Chem. Theory Comput.* 2007, **3**, 2011–2033.
10. J. Tomasi, M. Persico; *Chem. Rev.* 1994, **94**, 2027–2094.
11. M. J. Frisch; Gaussian 09, revision B.01; Gaussian, Inc.: Pittsburgh, PA, **2009**.
12. G. A. Andrienko; Chemcraft Molecular Visualization Program, Version 1.8 (build 445).
